# Supplementary material for: The Potential Impact of Connexin 43 Expression on Bcl-2 Protein Level and Taxane Sensitivity in Head and Neck Cancers–In Vitro Studies
Source: PubMed Central journal article supplement (PMC6966683; doi:10.3390/cancers11121848), 2019-11-22
Supplement: cancers-11-01848-s001.pdf [file cancers-11-01848-s001.pdf]

# Supplementary Materials: The Potential Impact of Connexin 43 Expression on Bcl-2 Protein Level and Taxane Sensitivity in Head and Neck Cancers–in Vitro Studies

Bianka Gurbi, Diána Brauswetter, Attila Varga, Pál Gyulavári, Kinga Péntzes, József Murányi, Veronika Zámbo, Ede Birtalan, Tibor Krenács, David Laurence Becker, Miklós Csala, István Vályi-Nagy, István Peták and Kornél Dános

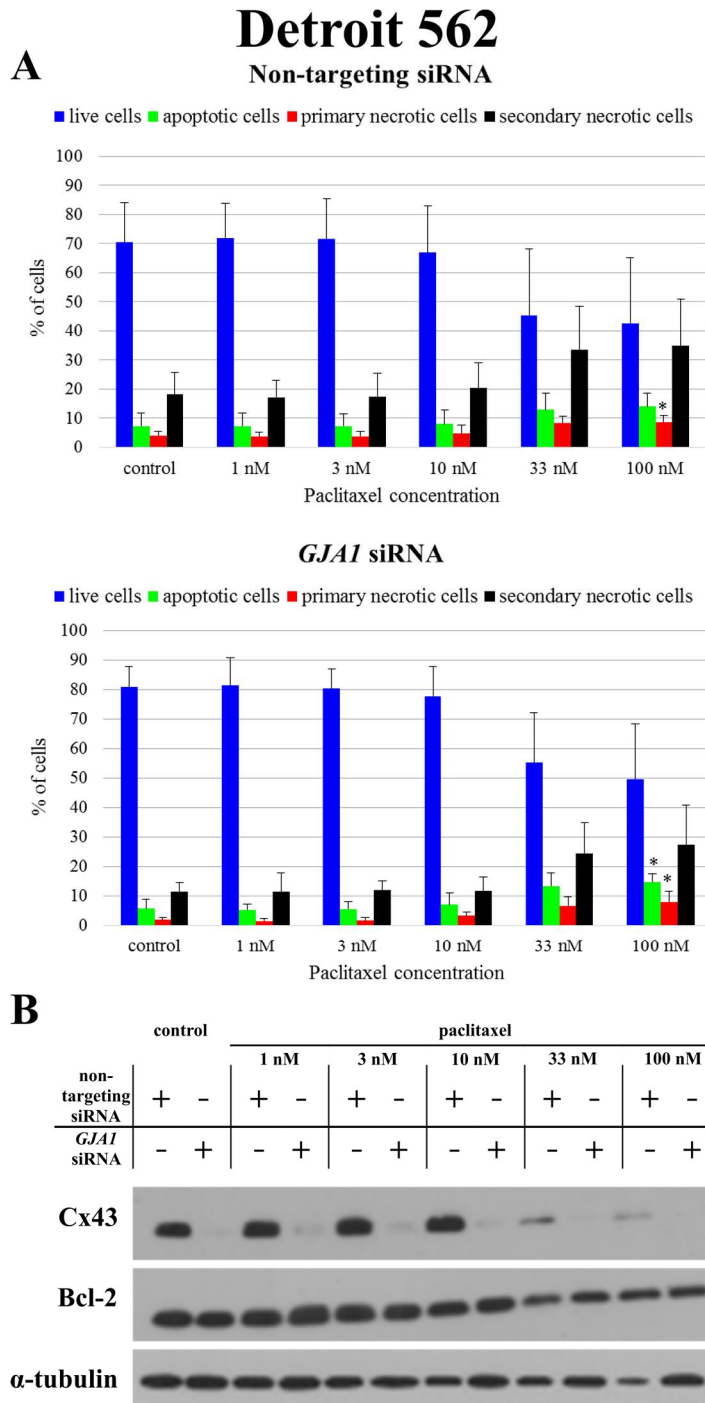

**Figure S1.** Changes in the paclitaxel-induced apoptosis of Detroit 562 after knocking down Cx43. (A) Annexin V-FLUOS/PI (Ann/PI)-stained HNSCC cells were analyzed by FACS after 48 h of treatment

with paclitaxel at different concentrations. Live cells are presented by the Ann-/PI- fraction, apoptotic cells by the Ann+/PI- fraction, secondary necrotic cells by the Ann+/PI+ fraction and primary necrotic cells are detected in the Ann-/PI+ fraction. Data are presented as mean ± SD. Statistical analysis was performed by Student's t-test, the cell fractions in all concentration were compared to negative control fractions in non-targeting siRNA or *GJA1* siRNA treated samples. The cell fractions in *GJA1* siRNA treated samples were also compared to cell fractions in non-targeting siRNA treated samples. \*p < 0.05 (B) Cells were subjected to western blot analysis with antibodies against Cx43, Bcl-2 and the loading control,  $\alpha$ -tubulin.

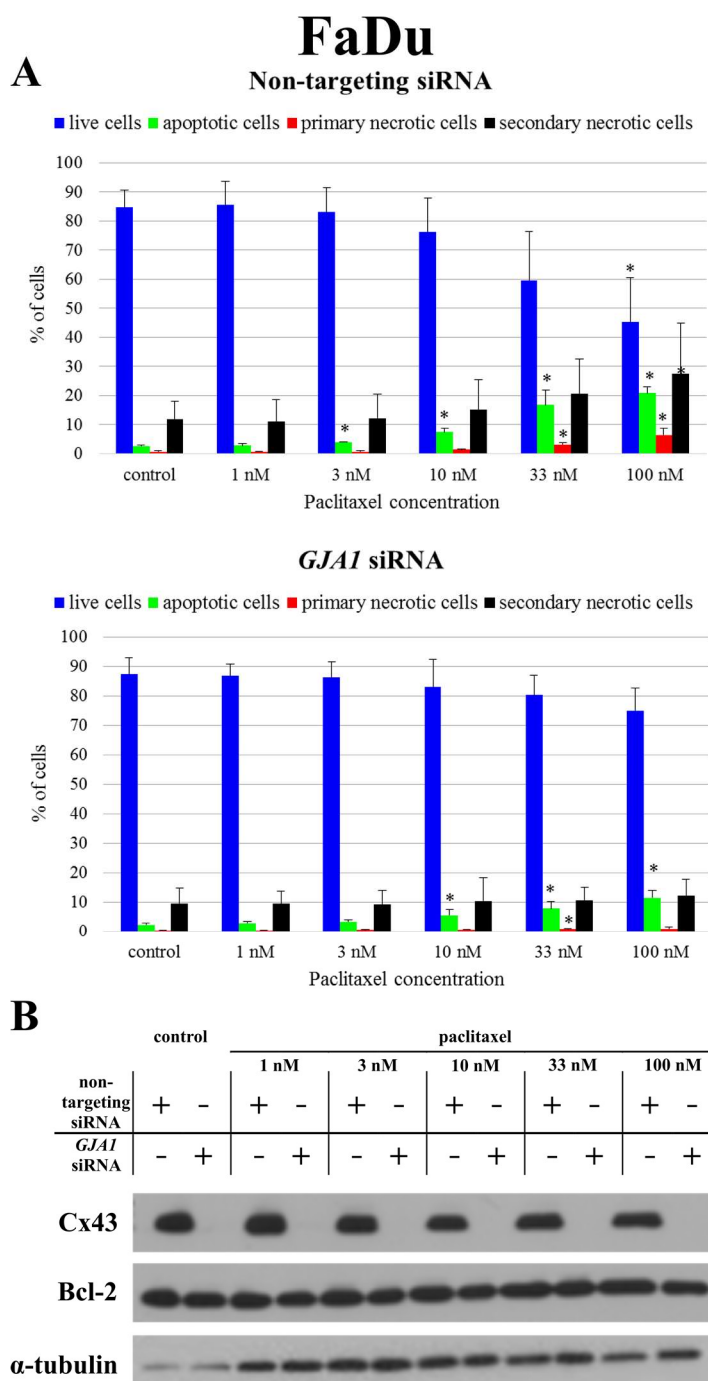

**Figure S2.** Changes in the paclitaxel-induced apoptosis of FaDu after knocking down Cx43. (A) Annexin V-FLUOS/PI (Ann/PI)-stained HNSCC cells were analyzed by FACS after 48 h of treatment with paclitaxel at different concentrations. Live cells are presented by the Ann-/PI- fraction, apoptotic cells by the Ann+/PI- fraction, secondary necrotic cells by the Ann+/PI+ fraction and primary necrotic cells by the Ann-/PI+ fraction. Data are presented as mean ± SD. Statistical analysis was performed by Student's t-test, the cell fractions in all concentration were compared to negative control fractions in non-targeting siRNA or *GJA1* siRNA treated samples. The cell fractions in *GJA1* siRNA treated samples were also compared to cell fractions in non-targeting siRNA treated samples. \*p < 0.05 (B) Cells were subjected to western blot analysis with antibodies against Cx43, Bcl-2 and the loading control,  $\alpha$ -tubulin.

cells are detected in the Ann-/PI+ fraction. Data are presented as mean  $\pm$  SD. Statistical analysis was performed by Student's t-test, the cell fractions in all concentration were compared to negative control fractions in non-targeting siRNA or *GJA1* siRNA treated samples. The cell fractions in *GJA1* siRNA treated samples were also compared to cell fractions in non-targeting siRNA treated samples. \* $p < 0.05$  (B) Cells were subjected to western blot analysis with antibodies against Cx43, Bcl-2 and the loading control,  $\alpha$ -tubulin.

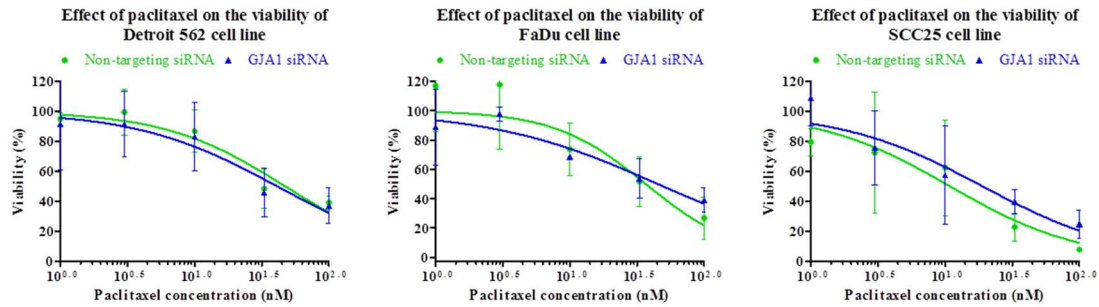

**Figure S3.** Changes in the effect of paclitaxel on cell viability after knocking down Cx43. HNSCC cell lines were analyzed by trypan blue exclusion test after 48 h of treatment with paclitaxel at different concentrations. IC<sub>50</sub> curves of paclitaxel on Detroit 562, FaDu and SCC25 cell lines. The results represent the mean of three independent experiments with SD.

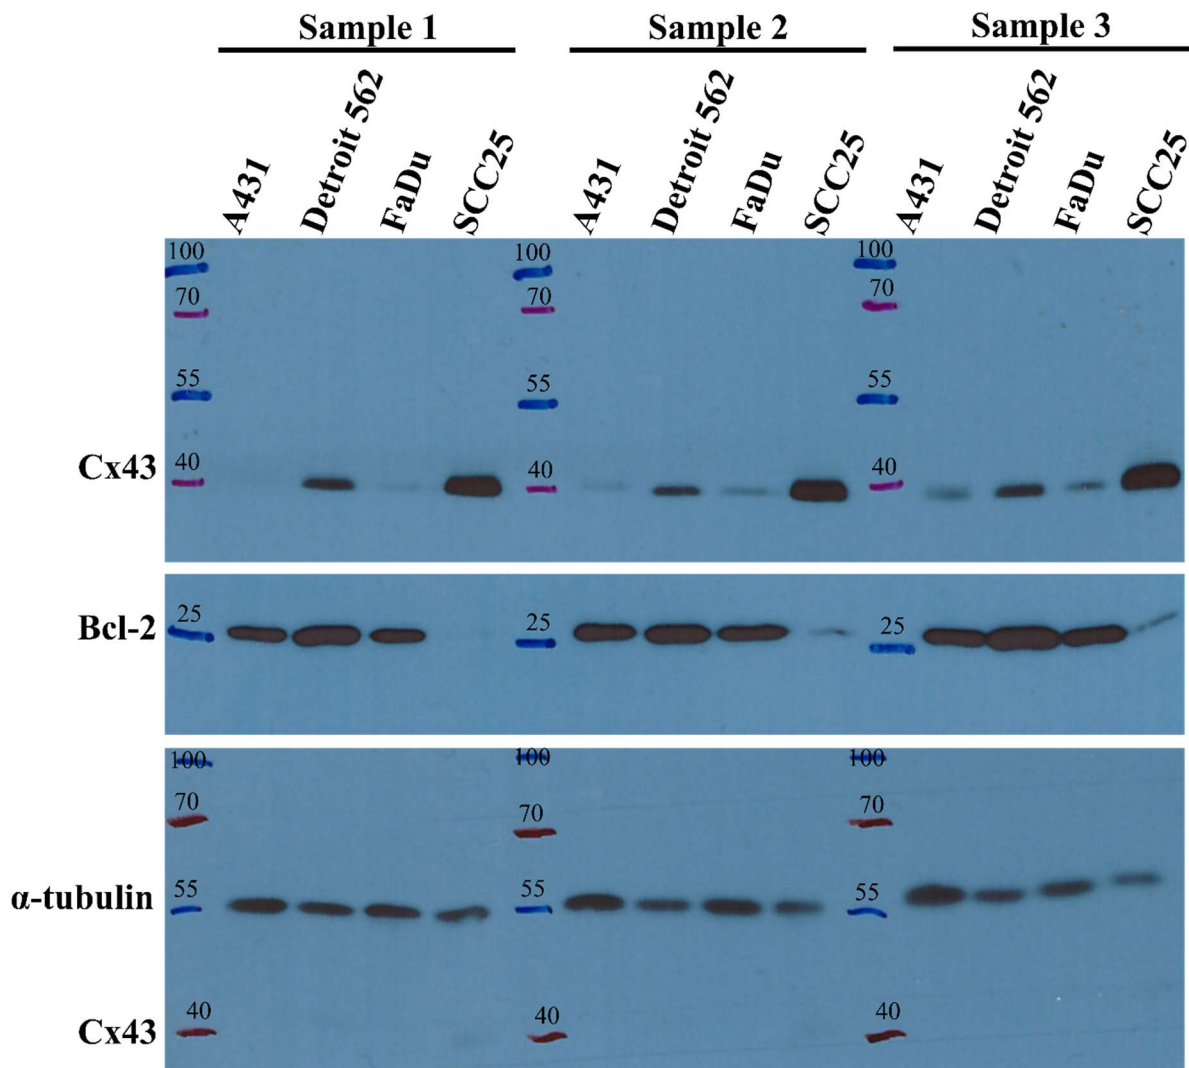

**Figure S4.** Expression of Cx43 and Bcl-2 in HNSCC cell lines and human skin epidermoid carcinoma cell line, A431. We were not used A431 in this article. Cells were subjected to western blot analysis with antibodies against Cx43, Bcl-2 and the loading control,  $\alpha$ -tubulin. (Figure 1A).

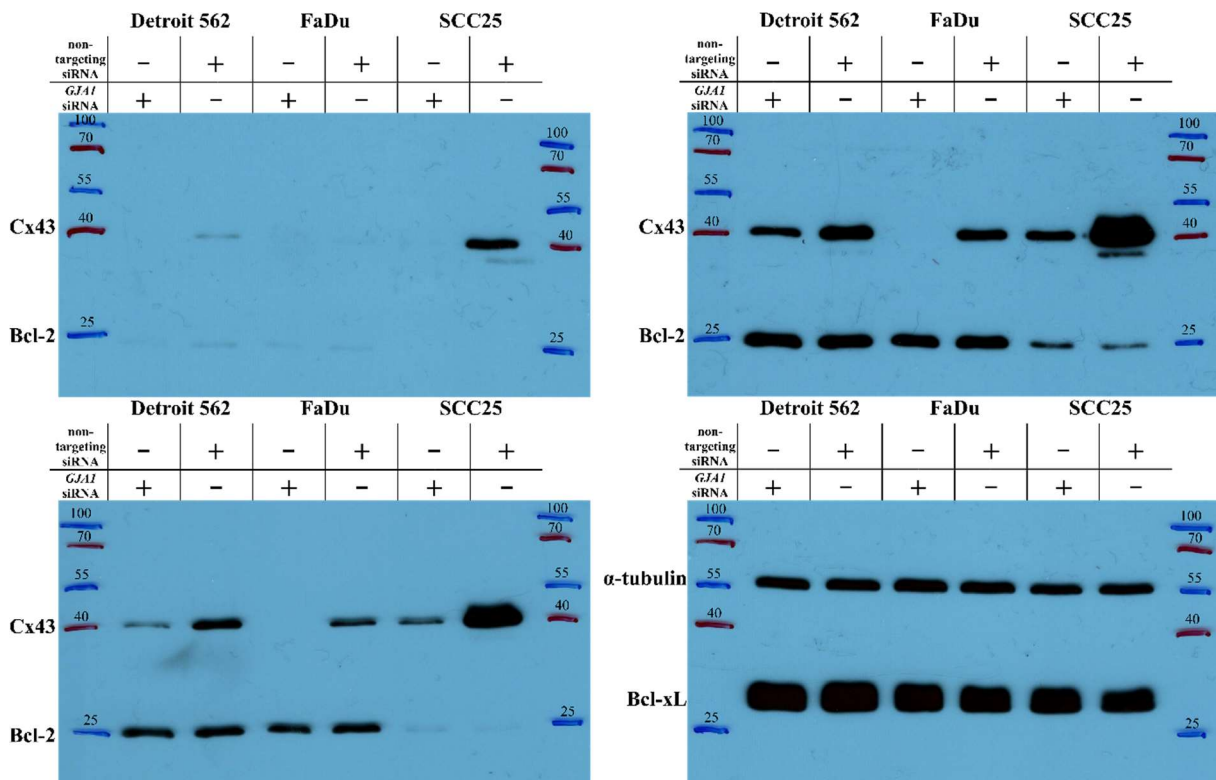

**Figure S5.** Changes in the levels of Cx43 and Bcl-2 after *GJA1* siRNA knockdown in HNSCC cell lines. Cells were subjected to western blot analysis with antibodies against Cx43, Bcl-2, Bcl-xL and the loading control,  $\alpha$ -tubulin. We have not used Bcl-xL in this article. (Figure 4A).

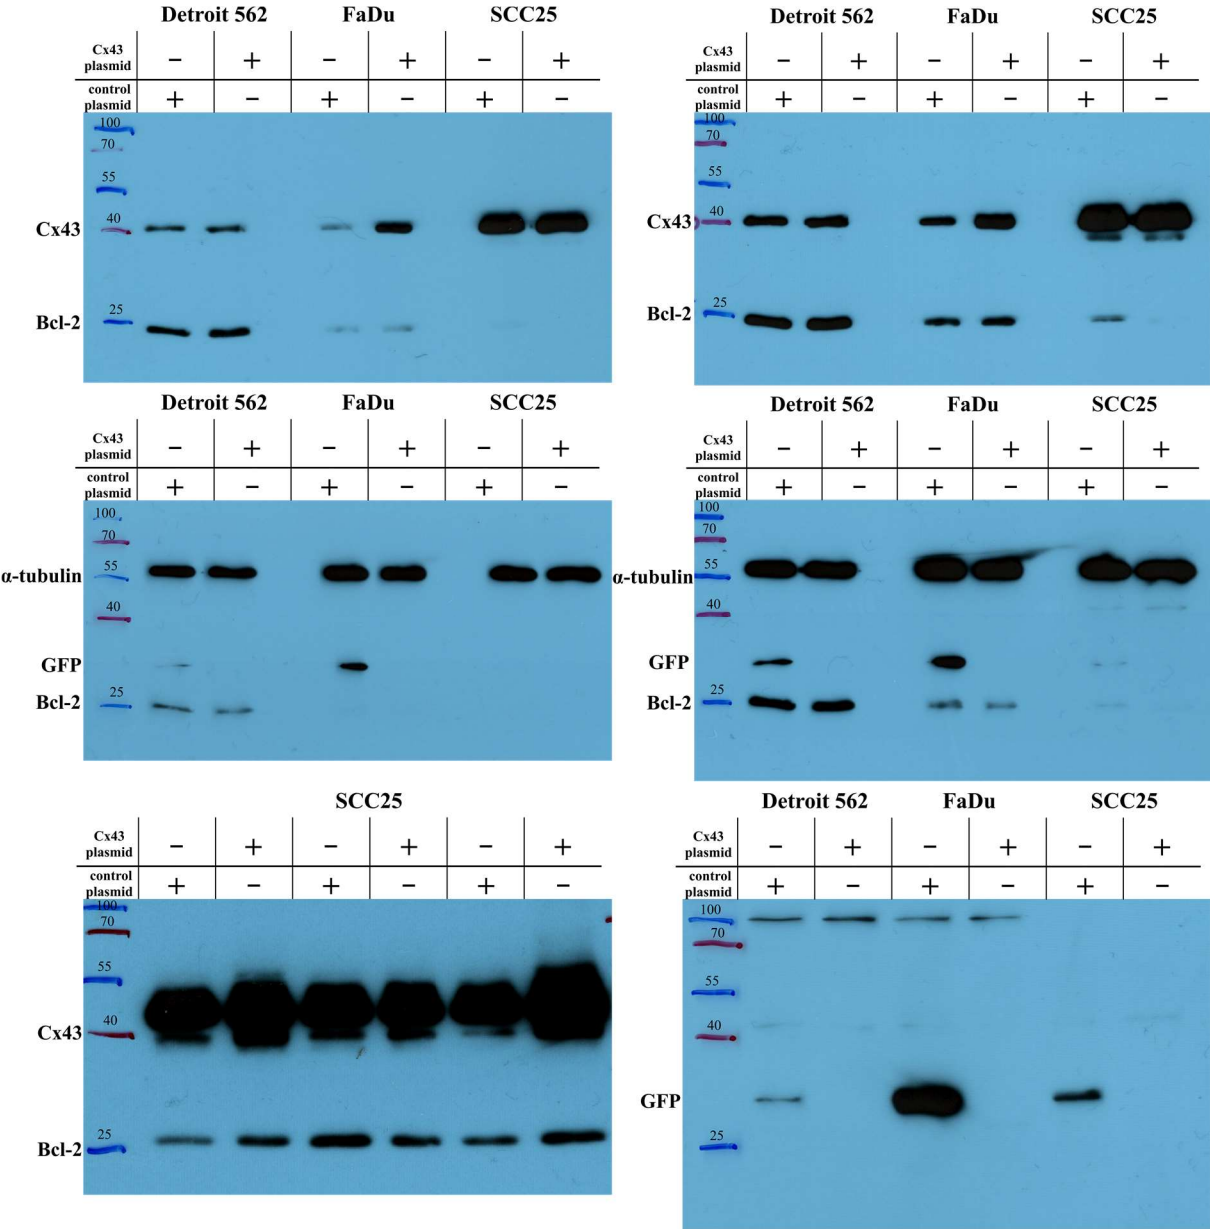

**Figure S6.** Changes in the levels of Cx43 and Bcl-2 after Cx43 plasmid transfection in HNSCC cell lines. Cells were subjected to western blot analysis with antibodies against Cx43, Bcl-2, GFP and the loading control,  $\alpha$ -tubulin. (Figure 4B).

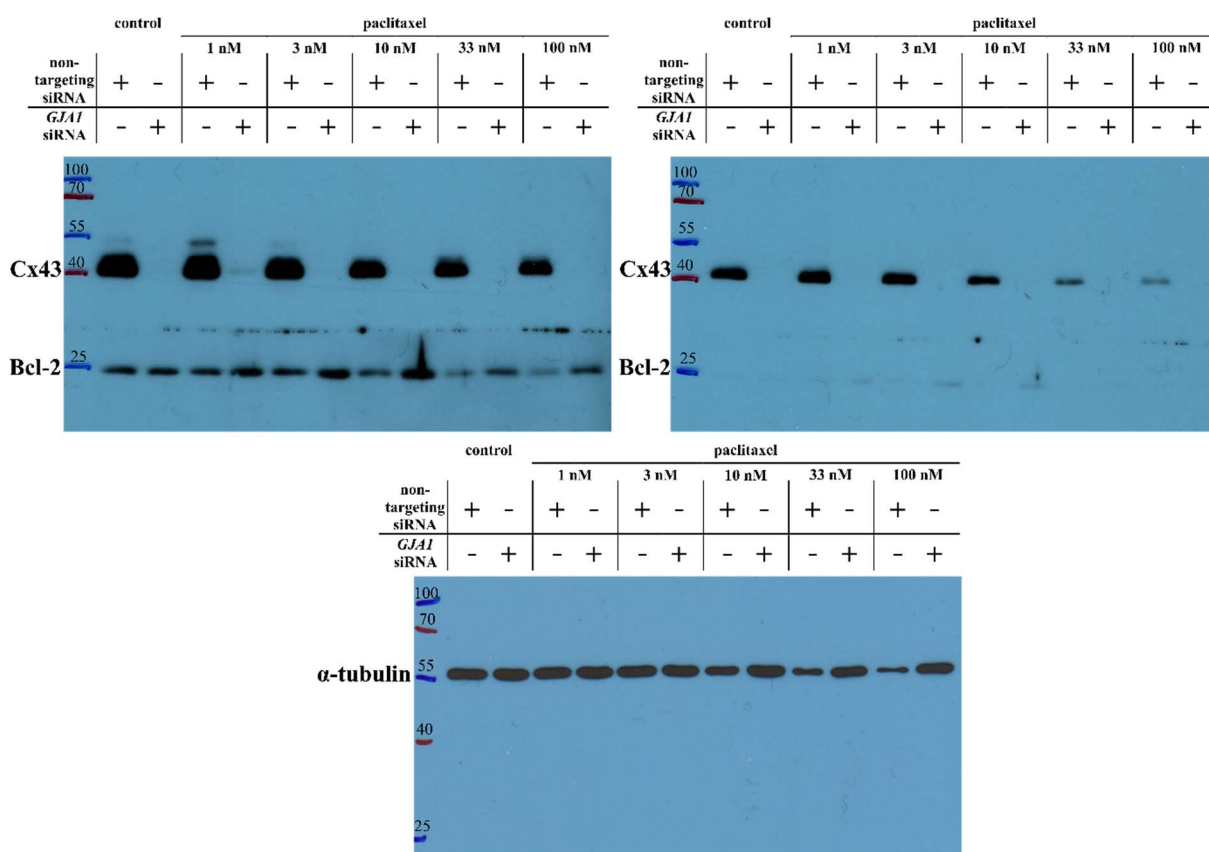

**Figure S7.** Changes in the paclitaxel-induced apoptosis of SCC25 after knocking down Cx43. Cells were subjected to a western blot analysis with antibodies against Cx43, Bcl-2 and the loading control,  $\alpha$ -tubulin. (Figure 5B).

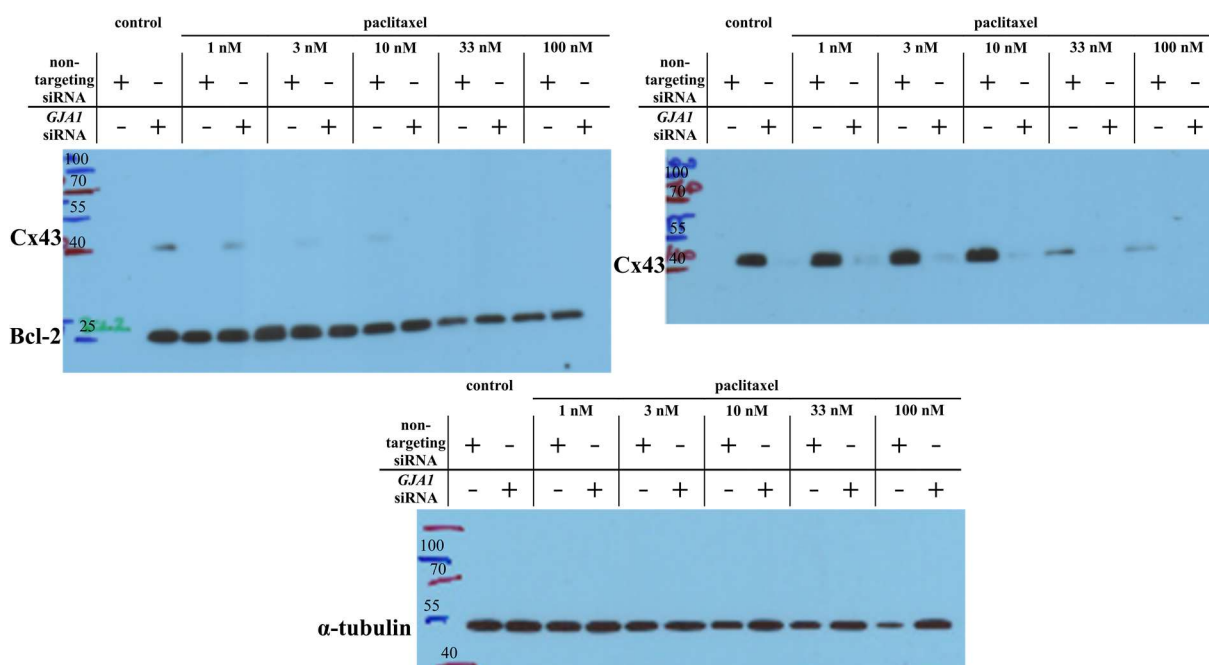

**Figure S8.** Changes in the paclitaxel-induced apoptosis of Detroit 562 after knocking down Cx43. Cells were subjected to a western blot analysis with antibodies against Cx43, Bcl-2 and the loading control,  $\alpha$ -tubulin. (Figure S1).

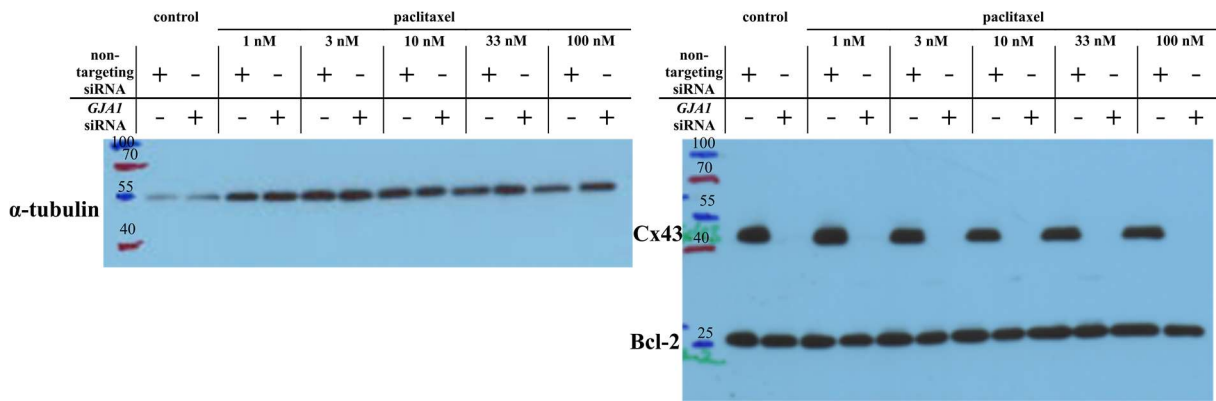

**Figure S9.** Changes in the paclitaxel-induced apoptosis of FaDu after knocking down Cx43. Cells were subjected to a western blot analysis with antibodies against Cx43, Bcl-2 and the loading control,  $\alpha$ -tubulin. (Figure S2).

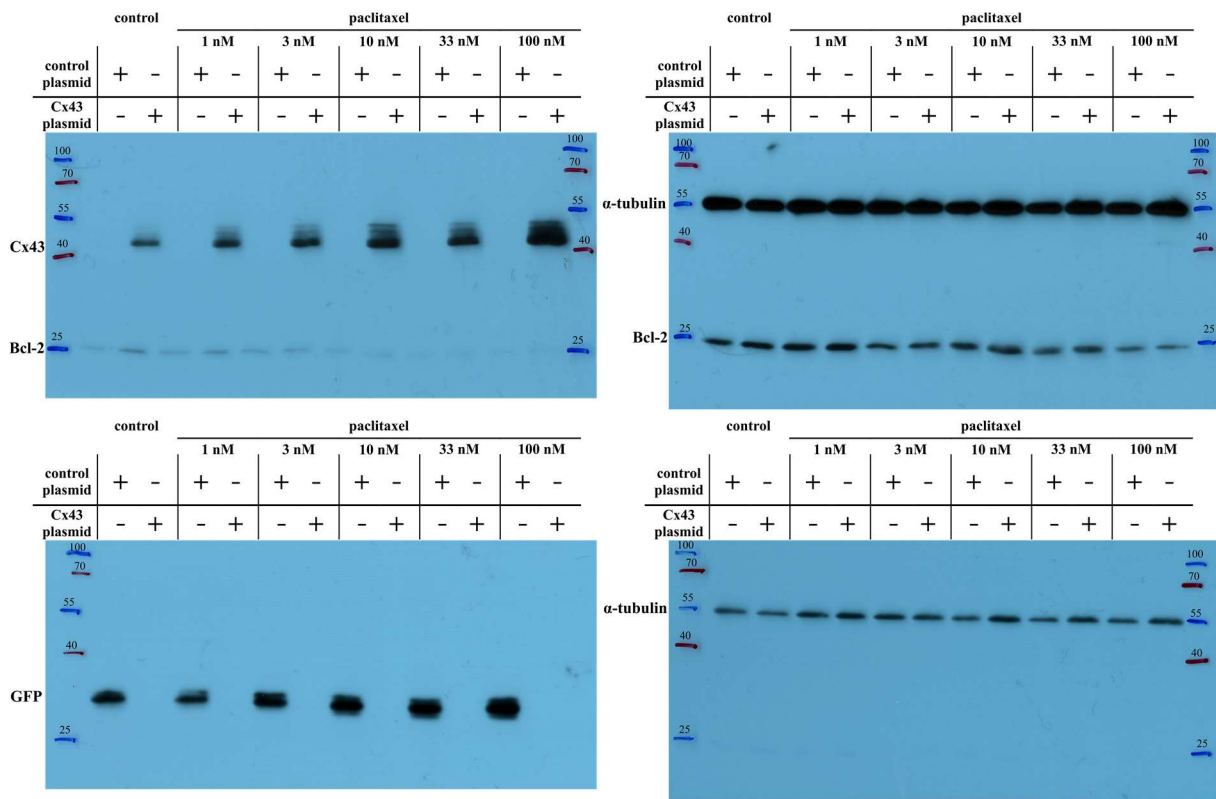

**Figure S10.** Changes in the effect of paclitaxel on cell viability of FaDu after transfection Cx43. FaDu cells were subjected to a western blot analysis with antibodies against Cx43, Bcl-2, GFP and the loading control,  $\alpha$ -tubulin. (Figure 6C).

**Table S1.** Changes in the effect of paclitaxel on cell viability after knocking down Cx43. HNSCC cell lines were analyzed by trypan blue exclusion test after 48 h of treatment with paclitaxel at different concentrations. IC<sub>50</sub> concentrations of paclitaxel measured on Detroit 562, FaDu and SCC25 cell lines. IC<sub>50</sub> values are the mean of three different measurements.

|                     | Detroit 562 |   | FaDu |   | SCC25 |   |
|---------------------|-------------|---|------|---|-------|---|
| Non-targeting siRNA | +           | - | +    | - | +     | - |
| GJA1 siRNA          | -           | + | -    | + | -     | + |

|                   |          |          |          |          |          |          |
|-------------------|----------|----------|----------|----------|----------|----------|
| <i>paclitaxel</i> | 47.04 nM | 41.01 nM | 36.73 nM | 45.11 nM | 10.84 nM | 18.93 nM |
|-------------------|----------|----------|----------|----------|----------|----------|

**Table S2.** Expression of Cx43 and Bcl-2 in HNSCC cell lines. Densitometry analysis was performed using three independent experiments. The expressions of all proteins were normalized to the expression of  $\alpha$ -tubulin. (Figure 1B).

| Cell line   | Densitometry intensity of $\alpha$ -tubulin |          |           |          |          |
|-------------|---------------------------------------------|----------|-----------|----------|----------|
|             | Sample 1                                    | Sample 2 | Sample 3  | Mean     | SD       |
| Detroit 562 | 9493.397                                    | 22227    | 30829.075 | 20849.66 | 10734.27 |
| FaDu        | 14972.418                                   | 28803    | 33806.246 | 25860.68 | 9755.657 |
| SCC25       | 8620.933                                    | 15800    | 22190.953 | 15537.18 | 6788.816 |

  

| Cell line   | Densitometry intensity of Cx43 |          |           |          |          |
|-------------|--------------------------------|----------|-----------|----------|----------|
|             | Sample 1                       | Sample 2 | Sample 3  | Mean     | SD       |
| Detroit 562 | 9949.619                       | 11556    | 18387.453 | 13297.83 | 4480.364 |
| FaDu        | 4781.426                       | 5814     | 9385.533  | 6660.246 | 2415.953 |
| SCC25       | 21749.953                      | 28788    | 33362.541 | 27966.81 | 5849.677 |

  

| Cell line   | Densitometry intensity ratio of Cx43 |          |          |      |      |
|-------------|--------------------------------------|----------|----------|------|------|
|             | Sample 1                             | Sample 2 | Sample 3 | Mean | SD   |
| Detroit 562 | 1.05                                 | 0.52     | 0.60     | 0.72 | 0.29 |
| FaDu        | 0.32                                 | 0.20     | 0.28     | 0.27 | 0.06 |
| SCC25       | 2.52                                 | 1.82     | 1.50     | 1.95 | 0.52 |

  

| Cell line   | Densitometry intensity of Bcl-2 |           |           |          |         |
|-------------|---------------------------------|-----------|-----------|----------|---------|
|             | Sample 1                        | Sample 2  | Sample 3  | Mean     | SD      |
| Detroit 562 | 17638.912                       | 17397.569 | 22557.276 | 19197.92 | 2911.79 |
| FaDu        | 11103.083                       | 14597.983 | 16935.296 | 14212.12 | 2935.19 |
| SCC25       | 690.456                         | 1744.406  | 2769.497  | 1734.79  | 1039.55 |

  

| Cell line   | Densitometry intensity ratio of Bcl-2 |          |          |      |      |
|-------------|---------------------------------------|----------|----------|------|------|
|             | Sample 1                              | Sample 2 | Sample 3 | Mean | SD   |
| Detroit 562 | 1.86                                  | 0.78     | 0.73     | 1.12 | 0.64 |
| FaDu        | 0.74                                  | 0.51     | 0.50     | 0.58 | 0.14 |
| SCC25       | 0.08                                  | 0.11     | 0.12     | 0.11 | 0.02 |



**Table S3.** Expression of Cx43 and Bcl-2 in HNSCC cell lines. Densitometry analysis was performed using three independent experiments. The expressions of all proteins were normalized to the expression of  $\alpha$ -tubulin. Statistical analysis was performed by Student's t-test, the Cx43 expression of the cell lines were compared to each other. Red color indicate if  $p < 0.05$ . (Figure 1B).

| Group 1 vs. Group 2                             | T-test for Independent Samples (Cx43. Bcl2 exp) Note: Variables were treated as independent samples |             |          |    |          |     |     |                |                |                   |            |
|-------------------------------------------------|-----------------------------------------------------------------------------------------------------|-------------|----------|----|----------|-----|-----|----------------|----------------|-------------------|------------|
|                                                 | Mean Group1                                                                                         | Mean Group2 | t-value  | df | p        | N 1 | N 2 | Std.Dev Group1 | Std.Dev Group2 | F-ratio Variances | p Variance |
| Detroit 562 Cx43/tubulin vs. FaDu Cx43/tubulin  | 0.721476                                                                                            | 0.266273    | 2.70426  | 4  | 0.053856 | 3   | 3   | 0.28540        | 0.059570       | 22.95436          | 0.083492   |
| Detroit 562 Cx43/tubulin vs. SCC25 Cx43/tubulin | 0.721476                                                                                            | 1.949472    | -3.57751 | 4  | 0.023219 | 3   | 3   | 0.28540        | 0.521552       | 3.33950           | 0.460883   |
| FaDu Cx43/tubulin vs. SCC25 Cx43/tubulin        | 0.266273                                                                                            | 1.949472    | -5.55372 | 4  | 0.005144 | 3   | 3   | 0.05957        | 0.521552       | 76.65604          | 0.025755   |

**Table S4.** Expression of Cx43 and Bcl-2 in HNSCC cell lines. Densitometry analysis was performed using three independent experiments. The expressions of all proteins were normalized to the expression of  $\alpha$ -tubulin. Statistical analysis was performed by Student's t-test, the Bcl-2 expression of the cell lines were compared to each other. Red color indicate if  $p < 0.05$ . (Figure 1B).

| Group 1 vs. Group 2                             | T-test for Independent Samples (Cx43. Bcl2 exp) Note: Variables were treated as independent samples |              |         |    |          |     |     |                  |                  |                  |            |
|-------------------------------------------------|-----------------------------------------------------------------------------------------------------|--------------|---------|----|----------|-----|-----|------------------|------------------|------------------|------------|
|                                                 | Mean Group 1                                                                                        | Mean Group 2 | t-value | df | p        | N 1 | N 2 | Std.Dev. Group 1 | Std.Dev. Group 2 | F-ratio Variance | p Variance |
| Detroit 562 Bcl2/tubulin vs. FaDu Bcl2/tubulin  | 1.124149                                                                                            | 0.583112     | 1.44014 | 4  | 0.223251 | 3   | 3   | 0.636063         | 0.137259         | 21.4742          | 0.088991   |
| Detroit 562 Bcl2/tubulin vs. SCC25 Bcl2/tubulin | 1.124149                                                                                            | 0.105101     | 2.77317 | 4  | 0.050168 | 3   | 3   | 0.636063         | 0.022824         | 776.6460         | 0.002572   |
| FaDu Bcl2/tubulin vs. SCC25 Bcl2/tubulin        | 0.583112                                                                                            | 0.105101     | 5.95024 | 4  | 0.004003 | 3   | 3   | 0.137259         | 0.022824         | 36.1665          | 0.053812   |

**Table S5.** Quantitative PCR analysis of Cx43 and Bcl-2 mRNA expression in HNSCC cell lines. Quantitative PCR analysis was performed using three independent experiments. The expressions of all mRNAs were normalized to the expression of  $\alpha$ -tubulin. (Figure 1B).

| Cell line   | Ct of $\alpha$ -tubulin         |          |          |         |        |
|-------------|---------------------------------|----------|----------|---------|--------|
|             | Sample 1                        | Sample 2 | Sample 3 | Mean    | SD     |
| Detroit 562 | 25.5667                         | 24.7533  | 26.1200  | 25.4800 | 0.6874 |
| FaDu        | 27.9167                         | 28.6100  | 28.8467  | 28.4578 | 0.4833 |
| SCC25       | 25.2867                         | 25.2800  | 25.3933  | 25.3200 | 0.0636 |
| Cell line   | Ct of Cx43                      |          |          |         |        |
|             | Sample 1                        | Sample 2 | Sample 3 | Mean    | SD     |
| Detroit 562 | 28.5867                         | 28.3467  | 28.9600  | 28.6311 | 0.3091 |
| FaDu        | 31.3833                         | 31.2000  | 31.3267  | 31.3033 | 0.0939 |
| SCC25       | 26.4733                         | 25.8433  | 25.5467  | 25.9544 | 0.4732 |
| Cell line   | $2^{-\Delta\Delta Ct}$ of Cx43  |          |          |         |        |
|             | Sample 1                        | Sample 2 | Sample 3 | Mean    | SD     |
| Detroit 562 | 1.00                            | 0.67     | 1.13     | 0.93    | 0.24   |
| FaDu        | 0.73                            | 1.35     | 1.45     | 1.18    | 0.39   |
| SCC25       | 3.56                            | 5.49     | 7.29     | 5.45    | 1.87   |
| Cell line   | Ct of Bcl-2                     |          |          |         |        |
|             | Sample 1                        | Sample 2 | Sample 3 | Mean    | SD     |
| Detroit 562 | 28.8967                         | 29.0400  | 29.4967  | 29.1444 | 0.3133 |
| FaDu        | 32.2200                         | 32.7267  | 32.6367  | 32.5278 | 0.1848 |
| SCC25       | 34.1600                         | 33.7967  | 34.0367  | 33.9978 | 0.2703 |
| Cell line   | $2^{-\Delta\Delta Ct}$ of Bcl-2 |          |          |         |        |
|             | Sample 1                        | Sample 2 | Sample 3 | Mean    | SD     |
| Detroit 562 | 1.00                            | 0.52     | 0.97     | 0.83    | 0.27   |
| FaDu        | 0.51                            | 0.58     | 0.73     | 0.61    | 0.11   |
| SCC25       | 0.02                            | 0.03     | 0.03     | 0.02    | 0.00   |

**Table S6.** Quantitative PCR analysis of Cx43 and Bcl-2 mRNA expression in HNSCC cell lines. Quantitative PCR analysis was performed using three independent experiments. The expressions of all mRNAs were normalized to the expression of  $\alpha$ -tubulin. Statistical analysis was performed by Student's t-test, the Cx43 mRNA expression of the cell lines were compared to each other. Red color indicate if  $p < 0.05$ . (Figure 1B).

| Group 1 vs. Group 2                             | T-test for Independent Samples (Spreadsheet1)<br>Note: Variables were treated as independent samples |             |          |    |          |     |     |                |                |                   |            |
|-------------------------------------------------|------------------------------------------------------------------------------------------------------|-------------|----------|----|----------|-----|-----|----------------|----------------|-------------------|------------|
|                                                 | Mean Group1                                                                                          | Mean Group2 | t-value  | df | p        | N 1 | N 2 | Std.Dev Group1 | Std.Dev Group2 | F-ratio Variances | p Variance |
| Detroit 562 Cx43/tubulin vs. FaDu Cx43/tubulin  | 0.83                                                                                                 | 0.606667    | 1.327318 | 4  | 0.255094 | 3   | 3   | 0.26889        | 0.112398       | 5.722955          | 0.297488   |
| Detroit 562 Cx43/tubulin vs. SCC25 Cx43/tubulin | 0.83                                                                                                 | 0.026667    | 5.173532 | 4  | 0.006636 | 3   | 3   | 0.26889        | 0.005774       | 2169              | 0.000922   |
| FaDu Cx43/tubulin vs. SCC25 Cx43/tubulin        | 0.6066667                                                                                            | 0.026667    | 8.926012 | 4  | 0.000871 | 3   | 3   | 0.1124         | 0.005774       | 379               | 0.005263   |

**Table S7.** Quantitative PCR analysis of Cx43 and Bcl-2 mRNA expression in HNSCC cell lines. Quantitative PCR analysis was performed using three independent experiments. The expressions of all mRNAs were normalized to the expression of  $\alpha$ -tubulin. Statistical analysis was performed by Student's t-test, the Bcl-2 mRNA expression of the cell lines were compared to each other. Red color indicate if  $p < 0.05$ . (Figure 1B).

| Group 1 vs. Group 2                             | T-test for Independent Samples (Spreadsheet1)<br>Note: Variables were treated as independent samples |              |           |    |          |     |     |                  |                  |                  |            |
|-------------------------------------------------|------------------------------------------------------------------------------------------------------|--------------|-----------|----|----------|-----|-----|------------------|------------------|------------------|------------|
|                                                 | Mean Group 1                                                                                         | Mean Group 2 | t-value   | df | p        | N 1 | N 2 | Std.Dev. Group 1 | Std.Dev. Group 2 | F-ratio Variance | p Variance |
| Detroit 562 Bcl2/tubulin vs. FaDu Bcl2/tubulin  | 0.93333333                                                                                           | 1.176667     | -0.923311 | 4  | 0.4081   | 3   | 3   | 0.237136         | 0.390043         | 2.705394         | 0.539754   |
| Detroit 562 Bcl2/tubulin vs. SCC25 Bcl2/tubulin | 0.93333333                                                                                           | 5.446667     | -4.157288 | 4  | 0.014177 | 3   | 3   | 0.237136         | 1.865378         | 61.87848         | 0.031807   |
| FaDu Bcl2/tubulin vs. SCC25 Bcl2/tubulin        | 1.17666667                                                                                           | 5.446667     | -3.880874 | 4  | 0.017828 | 3   | 3   | 0.390043         | 1.865378         | 22.87226         | 0.083779   |

**Table S8.** Effect of paclitaxel on cell viability. HNSCC cell lines were analyzed in parallel by MTT after 72 h of treatment with paclitaxel at different concentrations. (Figure 2A).

| Concentration<br>(nM) | Effect of paclitaxel on Detroit 562 cell viability (%) |          |          |             |          |
|-----------------------|--------------------------------------------------------|----------|----------|-------------|----------|
|                       | Sample 1                                               | Sample 2 | Sample 3 | Mean        | SD       |
| 100.00                | 10.97397                                               | 17.44524 | 16.26879 | 14.89599946 | 3.447132 |
| 33.33                 | 11.82995                                               | 19.23695 | 16.93683 | 16.00124435 | 3.791092 |
| 11.11                 | 13.67327                                               | 24.68054 | 20.85667 | 19.73682617 | 5.588427 |
| 3.70                  | 32.6012                                                | 36.0533  | 30.11101 | 32.9218389  | 2.984093 |
| 1.23                  | 76.37317                                               | 81.49781 | 68.76903 | 75.54667124 | 6.40451  |
| 0.41                  | 98.64927                                               | 99.36199 | 116.6716 | 104.8942815 | 10.20566 |
| 0.14                  | 93.33649                                               | 106.569  | 128.8044 | 109.5699646 | 17.92338 |
| 0.05                  | 103.9467                                               | 104.5035 | 136.3199 | 114.9233522 | 18.53202 |
| 0.02                  | 107.449                                                | 110.042  | 135.9564 | 117.815795  | 15.76361 |
| 0.01                  | 113.148                                                | 105.0265 | 134.915  | 117.6964845 | 15.45471 |
| Concentration<br>(nM) | Effect of paclitaxel on FaDu cell viability (%)        |          |          |             |          |
|                       | Sample 1                                               | Sample 2 | Sample 3 | Mean        | SD       |
| 100.00                | 26.97407                                               | 18.69288 | 17.36308 | 21.01000832 | 5.20765  |
| 33.33                 | 21.90802                                               | 18.58977 | 17.91108 | 19.46962489 | 2.138807 |
| 11.11                 | 26.42613                                               | 26.10844 | 22.50121 | 25.01192614 | 2.180138 |
| 3.70                  | 34.58415                                               | 38.98146 | 34.92637 | 36.16399514 | 2.445991 |
| 1.23                  | 44.62818                                               | 46.50157 | 39.06974 | 43.39983209 | 3.865186 |
| 0.41                  | 59.59638                                               | 58.12052 | 64.75204 | 60.82297985 | 3.481764 |
| 0.14                  | 75.50636                                               | 80.74625 | 79.59072 | 78.61444257 | 2.752988 |
| 0.05                  | 107.3973                                               | 100.6244 | 98.78542 | 102.2690208 | 4.535369 |
| 0.02                  | 106.8664                                               | 123.8793 | 99.95448 | 110.2334131 | 12.31267 |
| 0.01                  | 112.6663                                               | 131.623  | 102.8749 | 115.7214018 | 14.61549 |
| Concentration<br>(nM) | Effect of paclitaxel on SCC25 cell viability (%)       |          |          |             |          |
|                       | Sample 1                                               | Sample 2 | Sample 3 | Mean        | SD       |
| 100.00                | 7.531455                                               | 9.819512 | 7.07535  | 8.142105351 | 1.470468 |
| 33.33                 | 7.336523                                               | 8.296825 | 6.449693 | 7.361013998 | 0.92381  |
| 11.11                 | 8.924331                                               | 8.047916 | 7.475839 | 8.149362276 | 0.729555 |
| 3.70                  | 11.71008                                               | 10.30137 | 11.23868 | 11.08337893 | 0.717081 |
| 1.23                  | 25.79833                                               | 20.11295 | 18.74177 | 21.55101838 | 3.741631 |
| 0.41                  | 39.48254                                               | 28.35175 | 35.93697 | 34.59041981 | 5.68626  |
| 0.14                  | 68.25093                                               | 55.27339 | 57.31832 | 60.28087928 | 6.977587 |

|      |          |          |          |             |          |
|------|----------|----------|----------|-------------|----------|
| 0.05 | 85.3624  | 80.34327 | 74.89183 | 80.19916739 | 5.236769 |
| 0.02 | 94.06699 | 95.1515  | 85.4544  | 91.55762868 | 5.313292 |
| 0.01 | 104.0121 | 106.7755 | 93.04794 | 101.2784911 | 7.260549 |

**Table S9.** Effect of paclitaxel on cell viability. HNSCC cell lines were analyzed in parallel by MTT after 72 h of treatment with paclitaxel at different concentrations. Statistical analysis was performed by Student's t-test, the IC<sub>50</sub> concentrations of the cell lines were compared to each other. Red color indicate if  $p < 0.05$ . (Figure 2B).

| Group 1 vs. Group 2             | T-test for Independent Samples (Paclitaxel_IC50) Note: Variables were treated as independent samples |              |         |    |          |     |     |                  |                  |                   |             |
|---------------------------------|------------------------------------------------------------------------------------------------------|--------------|---------|----|----------|-----|-----|------------------|------------------|-------------------|-------------|
|                                 | Mean Group 1                                                                                         | Mean Group 2 | t-value | df | p        | N 1 | N 2 | Std.Dev. Group 1 | Std.Dev. Group 2 | F-ratio Variances | p Variances |
| Detroit 562 IC50 vs. FaDu IC50  | 2.920667                                                                                             | 1.513000     | 3.7537  | 4  | 0.019883 | 3   | 3   | 0.616249         | 0.205263         | 9.01342           | 0.199732    |
| Detroit 562 IC50 vs. SCC25 IC50 | 2.920667                                                                                             | 0.238200     | 7.4872  | 4  | 0.001702 | 3   | 3   | 0.616249         | 0.072920         | 71.42055          | 0.027616    |
| FaDu IC50 vs. SCC25 IC50        | 1.513000                                                                                             | 0.238200     | 10.1364 | 4  | 0.000533 | 3   | 3   | 0.205263         | 0.072920         | 7.92380           | 0.224120    |

**Table S10.** Paclitaxel-induced apoptosis of Detroit 562, FaDu and SCC25 cells. Annexin V-FLUOS/PI (Ann/PI)-stained HNSCC cells were analyzed by FACS after 48 h of treatment with paclitaxel at different concentrations. Live cells are presented by the Ann-/PI- fraction (LL), apoptotic cells by the Ann+/PI- fraction (LR), secondary necrotic cells by the Ann+/PI+ fraction (UR) and primary necrotic cells are detected in the Ann-/PI+ fraction (UL). (Figure 3).

| Concentration (nM) | Paclitaxel-induced apoptosis of Detroit 562 cell (%) |          |          |       |      |          |
|--------------------|------------------------------------------------------|----------|----------|-------|------|----------|
|                    | Sample 1                                             | Sample 2 | Sample 3 | Mean  | SD   |          |
| Control            | UL                                                   | 3.14     | 0.5      | 2.86  | 2.2  | 1.450149 |
|                    | UR                                                   | 3.6      | 3.2      | 7.72  | 4.8  | 2.502159 |
|                    | LL                                                   | 81.22    | 93.39    | 87.35 | 87.3 | 6.085055 |
|                    | LR                                                   | 12.03    | 2.91     | 2.07  | 5.7  | 5.523912 |
| 1                  | UL                                                   | 2.36     | 0.31     | 2.58  | 1.8  | 1.251919 |
|                    | UR                                                   | 4.88     | 2.29     | 8.93  | 5.4  | 3.346645 |
|                    | LL                                                   | 80.55    | 94.86    | 84.19 | 86.5 | 7.437233 |
|                    | LR                                                   | 12.21    | 2.54     | 4.3   | 6.4  | 5.150641 |
| 3                  | UL                                                   | 4.78     | 0.26     | 6.94  | 4.0  | 3.408773 |
|                    | UR                                                   | 5.36     | 2.41     | 16.3  | 8.0  | 7.317994 |
|                    | LL                                                   | 74.43    | 94.43    | 70.94 | 79.9 | 12.67517 |
|                    | LR                                                   | 15.43    | 2.9      | 5.82  | 8.1  | 6.555906 |
| 10                 | UL                                                   | 12.23    | 0.81     | 5.9   | 6.3  | 5.721209 |
|                    | UR                                                   | 14.22    | 11.29    | 21.12 | 15.5 | 5.046844 |
|                    | LL                                                   | 51.36    | 76.25    | 62.87 | 63.5 | 12.4567  |
|                    | LR                                                   | 22.19    | 11.65    | 10.11 | 14.7 | 6.575074 |

|     |    |       |       |       |      |          |
|-----|----|-------|-------|-------|------|----------|
| 33  | UL | 9.16  | 0.89  | 7.03  | 5.7  | 4.293976 |
|     | UR | 12.73 | 12.01 | 31.64 | 18.8 | 11.13136 |
|     | LL | 52.86 | 74.33 | 51.25 | 59.5 | 12.88565 |
|     | LR | 25.25 | 12.77 | 10.07 | 16.0 | 8.098074 |
| 100 | UL | 8.93  | 1.54  | 5.15  | 5.2  | 3.695326 |
|     | UR | 9.35  | 13.56 | 31.65 | 18.2 | 11.84808 |
|     | LL | 51.21 | 71.28 | 52.2  | 58.2 | 11.31247 |
|     | LR | 30.5  | 13.62 | 11    | 18.4 | 10.58339 |

| Concentration<br>(nM) | Paclitaxel-induced apoptosis of FaDu cell (%) |          |          |       |      |          |
|-----------------------|-----------------------------------------------|----------|----------|-------|------|----------|
|                       | Sample 1                                      | Sample 2 | Sample 3 | Mean  | SD   |          |
| Control               | UL                                            | 1.46     | 1.44     | 0.52  | 1.1  | 0.537029 |
|                       | UR                                            | 1.65     | 3.21     | 1.43  | 2.1  | 0.970429 |
|                       | LL                                            | 93.44    | 88.89    | 96.83 | 93.1 | 3.984098 |
|                       | LR                                            | 3.46     | 6.46     | 1.23  | 3.7  | 2.62443  |
| 1                     | UL                                            | 1.36     | 3.19     | 0.24  | 1.6  | 1.489172 |
|                       | UR                                            | 1.77     | 3.45     | 2.36  | 2.5  | 0.852311 |
|                       | LL                                            | 93.53    | 85.76    | 95.67 | 91.7 | 5.214732 |
|                       | LR                                            | 3.34     | 7.6      | 1.73  | 4.2  | 3.033057 |
| 3                     | UL                                            | 1.84     | 2.1      | 0.61  | 1.5  | 0.795885 |
|                       | UR                                            | 2.71     | 4.29     | 2.25  | 3.1  | 1.070016 |
|                       | LL                                            | 89.84    | 85.34    | 95.42 | 90.2 | 5.049634 |
|                       | LR                                            | 5.62     | 8.27     | 1.72  | 5.2  | 3.294819 |

Table S10. Continuation

|     |    |       |       |       |      |          |
|-----|----|-------|-------|-------|------|----------|
| 10  | UL | 3.51  | 2.17  | 1.49  | 2.4  | 1.027813 |
|     | UR | 4.43  | 10.06 | 4.3   | 6.3  | 3.288652 |
|     | LL | 84.86 | 74.97 | 90.37 | 83.4 | 7.803121 |
|     | LR | 7.2   | 12.8  | 3.83  | 7.9  | 4.530964 |
| 33  | UL | 4.72  | 1.86  | 1.87  | 2.8  | 1.648343 |
|     | UR | 6.64  | 10.75 | 9.92  | 9.1  | 2.1733   |
|     | LL | 79.26 | 70.3  | 78.37 | 76.0 | 4.936237 |
|     | LR | 9.38  | 17.08 | 9.84  | 12.1 | 4.318935 |
| 100 | UL | 5.39  | 2.26  | 2.25  | 3.3  | 1.81     |
|     | UR | 11.26 | 13.17 | 10.53 | 11.7 | 1.363244 |
|     | LL | 71.58 | 64.85 | 74.9  | 70.4 | 5.120511 |
|     | LR | 11.77 | 19.72 | 12.33 | 14.6 | 4.43712  |

| Concentration<br>(nM) | Paclitaxel-induced apoptosis of SCC25 cell (%) |          |          |       |       |          |
|-----------------------|------------------------------------------------|----------|----------|-------|-------|----------|
|                       | Sample 1                                       | Sample 2 | Sample 3 | Mean  | SD    |          |
| Control               | UL                                             | 2.18     | 0.37     | 0.35  | 0.97  | 1.050825 |
|                       | UR                                             | 1.08     | 22.19    | 2.01  | 8.43  | 11.92846 |
|                       | LL                                             | 94.41    | 74.71    | 95.46 | 88.19 | 11.68871 |
| 1                     | LR                                             | 2.32     | 2.73     | 2.18  | 2.41  | 0.285832 |
|                       | UL                                             | 2.28     | 0.39     | 0.66  | 1.11  | 1.022204 |
|                       | UR                                             | 1.93     | 18.92    | 3.61  | 8.15  | 9.361967 |
| 3                     | LL                                             | 91.62    | 78.13    | 93.47 | 87.74 | 8.373751 |
|                       | LR                                             | 4.18     | 2.56     | 2.26  | 3.00  | 1.03286  |
|                       | UL                                             | 2.4      | 0.35     | 1.36  | 1.37  | 1.025037 |
| 10                    | UR                                             | 4.63     | 19.9     | 7.27  | 10.60 | 8.161489 |
|                       | LL                                             | 83.66    | 74.68    | 87.09 | 81.81 | 6.408502 |
|                       | LR                                             | 9.31     | 5.07     | 4.28  | 6.22  | 2.705014 |
| 33                    | UL                                             | 4.15     | 0.61     | 4.12  | 2.96  | 2.035215 |
|                       | UR                                             | 13.09    | 26.89    | 18.08 | 19.35 | 6.987563 |
|                       | LL                                             | 59.94    | 59.54    | 68.28 | 62.59 | 4.934626 |
| 100                   | LR                                             | 22.82    | 12.96    | 9.52  | 15.10 | 6.903419 |
|                       | UL                                             | 4.97     | 0.4      | 4.26  | 3.21  | 2.459289 |
|                       | UR                                             | 12.06    | 34.6     | 37.6  | 28.09 | 13.96032 |
| 33                    | LL                                             | 61.62    | 35.36    | 46.77 | 47.92 | 13.1675  |
|                       | LR                                             | 21.34    | 29.64    | 11.37 | 20.78 | 9.147712 |
|                       | UL                                             | 5.52     | 0.28     | 5.56  | 3.79  | 3.036928 |
| 100                   | UR                                             | 15.29    | 38.17    | 54.76 | 36.07 | 19.81836 |
|                       | LL                                             | 55.73    | 25.97    | 26.24 | 35.98 | 17.10453 |
|                       | LR                                             | 23.47    | 35.58    | 13.44 | 24.16 | 11.08627 |

**Table S11.** Paclitaxel-induced apoptosis of Detroit 562 cells. Annexin V-FLUOS/PI (Ann/PI)-stained HNSCC cells were analyzed by FACS after 48 h of treatment with paclitaxel at different concentrations. Live cells are presented by the Ann-/PI- fraction (LL), apoptotic cells by the Ann+/PI- fraction (LR), secondary necrotic cells by the Ann+/PI+ fraction (UR) and primary necrotic cells are detected in the Ann-/PI+ fraction (UL). Statistical analysis was performed by Student’s t-test, the cell fractions in all concentration were compared to control fractions in each cell line. Red color indicate if  $p < 0.05$ . (Figure 3).

| Group 1 vs. Group 2      | T-test for Independent Samples (Paclitaxel_FACS_Detroit562) Note: Variables were treated as independent samples |              |          |    |          |                 |                 |                  |                  |                   |             |
|--------------------------|-----------------------------------------------------------------------------------------------------------------|--------------|----------|----|----------|-----------------|-----------------|------------------|------------------|-------------------|-------------|
|                          | Mean Group 1                                                                                                    | Mean Group 2 | t-value  | df | p        | Valid N Group 1 | Valid N Group 2 | Std.Dev. Group 1 | Std.Dev. Group 2 | F-ratio Variances | p Variances |
| Control UL vs. 1 nM UL   | 2.166667                                                                                                        | 1.750000     | 0.37671  | 4  | 0.725523 | 3               | 3               | 1.450149         | 1.251919         | 1.34176           | 0.854060    |
| Control UL vs. 3 nM UL   | 2.166667                                                                                                        | 3.993333     | -0.85408 | 4  | 0.441191 | 3               | 3               | 1.450149         | 3.408773         | 5.52549           | 0.306490    |
| Control UL vs. 10 nM UL  | 2.166667                                                                                                        | 6.313333     | -1.21689 | 4  | 0.290534 | 3               | 3               | 1.450149         | 5.721209         | 15.56504          | 0.120736    |
| Control UL vs. 33 nM UL  | 2.166667                                                                                                        | 5.693333     | -1.34776 | 4  | 0.249009 | 3               | 3               | 1.450149         | 4.293976         | 8.76786           | 0.204753    |
| Control UL vs. 100 nM UL | 2.166667                                                                                                        | 5.206667     | -1.32641 | 4  | 0.255366 | 3               | 3               | 1.450149         | 3.695326         | 6.49352           | 0.266897    |
| 1 nM UL vs. 3 nM UL      | 1.750000                                                                                                        | 3.993333     | -1.06999 | 4  | 0.344892 | 3               | 3               | 1.251919         | 3.408773         | 7.41385           | 0.237703    |
| 1 nM UL vs. 10 nM UL     | 1.750000                                                                                                        | 6.313333     | -1.34958 | 4  | 0.248474 | 3               | 3               | 1.251919         | 5.721209         | 20.88447          | 0.091389    |
| 1 nM UL vs. 33 nM UL     | 1.750000                                                                                                        | 5.693333     | -1.52704 | 4  | 0.201463 | 3               | 3               | 1.251919         | 4.293976         | 11.76433          | 0.156687    |
| 1 nM UL vs. 100 nM UL    | 1.750000                                                                                                        | 5.206667     | -1.53452 | 4  | 0.199691 | 3               | 3               | 1.251919         | 3.695326         | 8.71271           | 0.205916    |
| 3 nM UL vs. 10 nM UL     | 3.993333                                                                                                        | 6.313333     | -0.60338 | 4  | 0.578799 | 3               | 3               | 3.408773         | 5.721209         | 2.81695           | 0.523978    |
| 3 nM UL vs. 33 nM UL     | 3.993333                                                                                                        | 5.693333     | -0.53707 | 4  | 0.619703 | 3               | 3               | 3.408773         | 4.293976         | 1.58680           | 0.773155    |
| 3 nM UL vs. 100 nM UL    | 3.993333                                                                                                        | 5.206667     | -0.41802 | 4  | 0.697400 | 3               | 3               | 3.408773         | 3.695326         | 1.17519           | 0.919458    |
| 10 nM UL vs. 33 nM UL    | 6.313333                                                                                                        | 5.693333     | 0.15012  | 4  | 0.887934 | 3               | 3               | 5.721209         | 4.293976         | 1.77524           | 0.720659    |
| 10 nM UL vs. 100 nM UL   | 6.313333                                                                                                        | 5.206667     | 0.28143  | 4  | 0.792337 | 3               | 3               | 5.721209         | 3.695326         | 2.39701           | 0.588753    |
| 33 nM UL vs. 100 nM UL   | 5.693333                                                                                                        | 5.206667     | 0.14879  | 4  | 0.888917 | 3               | 3               | 4.293976         | 3.695326         | 1.35025           | 0.850974    |

*Table S11. Continuation.*

| Group 1 vs. Group 2      | T-test for Independent Samples (Paclitaxel_FACS_Detroit562) Note: Variables were treated as independent samples |              |          |    |          |                 |                 |                  |                  |                   |             |
|--------------------------|-----------------------------------------------------------------------------------------------------------------|--------------|----------|----|----------|-----------------|-----------------|------------------|------------------|-------------------|-------------|
|                          | Mean Group 1                                                                                                    | Mean Group 2 | t-value  | df | p        | Valid N Group 1 | Valid N Group 2 | Std.Dev. Group 1 | Std.Dev. Group 2 | F-ratio Variances | p Variances |
| Control UR vs. 100 nM UR | 4.84000                                                                                                         | 18.18667     | -1.90902 | 4  | 0.128891 | 3               | 3               | 2.50216          | 11.84808         | 22.42158          | 0.085391    |



|                         |          |          |          |   |          |   |   |          |          |          |          |
|-------------------------|----------|----------|----------|---|----------|---|---|----------|----------|----------|----------|
| Control UR vs. 33 nM UR | 4.84000  | 18.79333 | -2.11829 | 4 | 0.101537 | 3 | 3 | 2.50216  | 11.13136 | 19.79096 | 0.096196 |
| Control UR vs. 10 nM UR | 4.84000  | 15.54333 | -3.29105 | 4 | 0.030186 | 3 | 3 | 2.50216  | 5.04684  | 4.06827  | 0.394612 |
| Control UR vs. 3 nM UR  | 4.84000  | 8.02333  | -0.71292 | 4 | 0.515277 | 3 | 3 | 2.50216  | 7.31799  | 8.55370  | 0.209343 |
| Control UR vs. 1 nM UR  | 4.84000  | 5.36667  | -0.21831 | 4 | 0.837877 | 3 | 3 | 2.50216  | 3.34665  | 1.78891  | 0.717125 |
| 1 nM UR vs. 100 nM UR   | 5.36667  | 18.18667 | -1.80357 | 4 | 0.145633 | 3 | 3 | 3.34665  | 11.84808 | 12.53363 | 0.147780 |
| 1 nM UR vs. 33 nM UR    | 5.36667  | 18.79333 | -2.00073 | 4 | 0.116019 | 3 | 3 | 3.34665  | 11.13136 | 11.06311 | 0.165795 |
| 1 nM UR vs. 10 nM UR    | 5.36667  | 15.54333 | -2.91076 | 4 | 0.043645 | 3 | 3 | 3.34665  | 5.04684  | 2.27416  | 0.610844 |
| 1 nM UR vs. 3 nM UR     | 5.36667  | 8.02333  | -0.57183 | 4 | 0.598037 | 3 | 3 | 3.34665  | 7.31799  | 4.78151  | 0.345931 |
| 3 nM UR vs. 100 nM UR   | 8.02333  | 18.18667 | -1.26408 | 4 | 0.274846 | 3 | 3 | 7.31799  | 11.84808 | 2.62127  | 0.552292 |
| 3 nM UR vs. 33 nM UR    | 8.02333  | 18.79333 | -1.40032 | 4 | 0.234013 | 3 | 3 | 7.31799  | 11.13136 | 2.31373  | 0.603550 |
| 3 nM UR vs. 10 nM UR    | 8.02333  | 15.54333 | -1.46521 | 4 | 0.216731 | 3 | 3 | 7.31799  | 5.04684  | 2.10254  | 0.644633 |
| 10 nM UR vs. 100 nM UR  | 15.54333 | 18.18667 | -0.35551 | 4 | 0.740159 | 3 | 3 | 5.04684  | 11.84808 | 5.51133  | 0.307157 |
| 10 nM UR vs. 33 nM UR   | 15.54333 | 18.79333 | -0.46058 | 4 | 0.669030 | 3 | 3 | 5.04684  | 11.13136 | 4.86471  | 0.341023 |
| 33 nM UR vs. 100 nM UR  | 18.79333 | 18.18667 | 0.06464  | 4 | 0.951565 | 3 | 3 | 11.13136 | 11.84808 | 1.13292  | 0.937681 |

Table S11. Continuation.

| Group 1 vs. Group 2      | T-test for Independent Samples (Paclitaxel_FACS_Detroit562) Note: Variables were treated as independent samples |              |         |    |          |                 |                 |                  |                  |                   |             |
|--------------------------|-----------------------------------------------------------------------------------------------------------------|--------------|---------|----|----------|-----------------|-----------------|------------------|------------------|-------------------|-------------|
|                          | Mean Group 1                                                                                                    | Mean Group 2 | t-value | df | P        | Valid N Group 1 | Valid N Group 2 | Std.Dev. Group 1 | Std.Dev. Group 2 | F-ratio Variances | p Variances |
| Control LL vs. 1 nM LL   | 87.32000                                                                                                        | 86.53333     | 0.14179 | 4  | 0.894098 | 3               | 3               | 6.08506          | 7.43723          | 1.493804          | 0.801988    |
| Control LL vs. 3 nM LL   | 87.32000                                                                                                        | 79.93333     | 0.90995 | 4  | 0.414320 | 3               | 3               | 6.08506          | 12.67517         | 4.338891          | 0.374610    |
| Control LL vs. 10 nM LL  | 87.32000                                                                                                        | 63.49333     | 2.97680 | 4  | 0.040868 | 3               | 3               | 6.08506          | 12.45670         | 4.190609          | 0.385311    |
| Control LL vs. 33 nM LL  | 87.32000                                                                                                        | 59.48000     | 3.38384 | 4  | 0.027687 | 3               | 3               | 6.08506          | 12.88565         | 4.484184          | 0.364685    |
| Control LL vs. 100 nM LL | 87.32000                                                                                                        | 58.23000     | 3.92250 | 4  | 0.017211 | 3               | 3               | 6.08506          | 11.31247         | 3.456094          | 0.448824    |
| 1 nM LL vs. 3 nM LL      | 86.53333                                                                                                        | 79.93333     | 0.77787 | 4  | 0.480090 | 3               | 3               | 7.43723          | 12.67517         | 2.904592          | 0.512217    |
| 1 nM LL vs. 10 nM LL     | 86.53333                                                                                                        | 63.49333     | 2.75065 | 4  | 0.051340 | 3               | 3               | 7.43723          | 12.45670         | 2.805326          | 0.525579    |
| 1 nM LL vs. 33 nM LL     | 86.53333                                                                                                        | 59.48000     | 3.14948 | 4  | 0.034531 | 3               | 3               | 7.43723          | 12.88565         | 3.001855          | 0.499768    |
| 1 nM LL vs. 100 nM LL    | 86.53333                                                                                                        | 58.23000     | 3.62106 | 4  | 0.022336 | 3               | 3               | 7.43723          | 11.31247         | 2.313619          | 0.603570    |
| 3 nM LL vs. 10 nM LL     | 79.93333                                                                                                        | 63.49333     | 1.60227 | 4  | 0.184355 | 3               | 3               | 12.67517         | 12.45670         | 1.035385          | 0.982615    |
| 3 nM LL vs. 33 nM LL     | 79.93333                                                                                                        | 59.48000     | 1.95997 | 4  | 0.121558 | 3               | 3               | 12.67517         | 12.88565         | 1.033486          | 0.983533    |
| 3 nM LL vs. 100 nM LL    | 79.93333                                                                                                        | 58.23000     | 2.21266 | 4  | 0.091355 | 3               | 3               | 12.67517         | 11.31247         | 1.255432          | 0.886748    |

|                        |          |          |         |   |          |   |   |          |          |          |          |
|------------------------|----------|----------|---------|---|----------|---|---|----------|----------|----------|----------|
| 10 nM LL vs. 33 nM LL  | 63.49333 | 59.48000 | 0.38786 | 4 | 0.717878 | 3 | 3 | 12.45670 | 12.88565 | 1.070055 | 0.966158 |
| 10 nM LL vs. 100 nM LL | 63.49333 | 58.23000 | 0.54178 | 4 | 0.616740 | 3 | 3 | 12.45670 | 11.31247 | 1.212527 | 0.903944 |
| 33 nM LL vs. 100 nM LL | 59.48000 | 58.23000 | 0.12627 | 4 | 0.905613 | 3 | 3 | 12.88565 | 11.31247 | 1.297472 | 0.870522 |

Table S11. Continuation.

| Group 1 vs. Group 2      | T-test for Independent Samples (Paclitaxel_FACS_Detroit562) Note: Variables were treated as independent samples |              |          |    |          |                 |                 |                  |                  |                   |             |
|--------------------------|-----------------------------------------------------------------------------------------------------------------|--------------|----------|----|----------|-----------------|-----------------|------------------|------------------|-------------------|-------------|
|                          | Mean Group 1                                                                                                    | Mean Group 2 | t-value  | df | p        | Valid N Group 1 | Valid N Group 2 | Std.Dev. Group 1 | Std.Dev. Group 2 | F-ratio Variances | p Variances |
| Control LR vs. 1 nM LR   | 5.67000                                                                                                         | 6.35000      | -0.15594 | 4  | 0.883631 | 3               | 3               | 5.52391          | 5.15064          | 1.150194          | 0.930149    |
| Control LR vs. 3 nM LR   | 5.67000                                                                                                         | 8.05000      | -0.48085 | 4  | 0.655739 | 3               | 3               | 5.52391          | 6.55591          | 1.408549          | 0.830375    |
| Control LR vs. 10 nM LR  | 5.67000                                                                                                         | 14.65000     | -1.81122 | 4  | 0.144343 | 3               | 3               | 5.52391          | 6.57507          | 1.416798          | 0.827541    |
| Control LR vs. 33 nM LR  | 5.67000                                                                                                         | 16.03000     | -1.83053 | 4  | 0.141141 | 3               | 3               | 5.52391          | 8.09807          | 2.149166          | 0.635089    |
| Control LR vs. 100 nM LR | 5.67000                                                                                                         | 18.37333     | -1.84305 | 4  | 0.139105 | 3               | 3               | 5.52391          | 10.58339         | 3.670761          | 0.428196    |
| 1 nM LR vs. 3 nM LR      | 6.35000                                                                                                         | 8.05000      | -0.35317 | 4  | 0.741784 | 3               | 3               | 5.15064          | 6.55591          | 1.620104          | 0.763328    |
| 1 nM LR vs. 10 nM LR     | 6.35000                                                                                                         | 14.65000     | -1.72121 | 4  | 0.160323 | 3               | 3               | 5.15064          | 6.57507          | 1.629592          | 0.760574    |
| 1 nM LR vs. 33 nM LR     | 6.35000                                                                                                         | 16.03000     | -1.74698 | 4  | 0.155564 | 3               | 3               | 5.15064          | 8.09807          | 2.471957          | 0.576044    |
| 1 nM LR vs. 100 nM LR    | 6.35000                                                                                                         | 18.37333     | -1.76930 | 4  | 0.151563 | 3               | 3               | 5.15064          | 10.58339         | 4.222086          | 0.382989    |
| 3 nM LR vs. 10 nM LR     | 8.05000                                                                                                         | 14.65000     | -1.23118 | 4  | 0.285695 | 3               | 3               | 6.55591          | 6.57507          | 1.005856          | 0.997080    |
| 3 nM LR vs. 33 nM LR     | 8.05000                                                                                                         | 16.03000     | -1.32657 | 4  | 0.255318 | 3               | 3               | 6.55591          | 8.09807          | 1.525802          | 0.791828    |
| 3 nM LR vs. 100 nM LR    | 8.05000                                                                                                         | 18.37333     | -1.43625 | 4  | 0.224278 | 3               | 3               | 6.55591          | 10.58339         | 2.606058          | 0.554622    |
| 10 nM LR vs. 33 nM LR    | 14.65000                                                                                                        | 16.03000     | -0.22914 | 4  | 0.829998 | 3               | 3               | 6.57507          | 8.09807          | 1.516918          | 0.794623    |
| 10 nM LR vs. 100 nM LR   | 14.65000                                                                                                        | 18.37333     | -0.51760 | 4  | 0.632048 | 3               | 3               | 6.57507          | 10.58339         | 2.590886          | 0.556966    |
| 33 nM LR vs. 100 nM LR   | 16.03000                                                                                                        | 18.37333     | -0.30457 | 4  | 0.775881 | 3               | 3               | 8.09807          | 10.58339         | 1.707993          | 0.738554    |

**Table S12.** Paclitaxel-induced apoptosis of FaDu cells. Annexin V-FLUOS/PI (Ann/PI)-stained HNSCC cells were analyzed by FACS after 48 h of treatment with paclitaxel at different concentrations. Live cells are presented by the Ann-/PI- fraction (LL), apoptotic cells by the Ann+/PI- fraction (LR), secondary necrotic cells by the Ann+/PI+ fraction (UR) and primary necrotic cells are detected in the Ann-/PI+ fraction (UL). Statistical analysis was performed by Student’s t-test, the cell fractions in all concentration were compared to control fractions in each cell line. Red color indicate if  $p < 0.05$ . (Figure 3).

|  |                                                                                                           |
|--|-----------------------------------------------------------------------------------------------------------|
|  | T-test for Independent Samples (Paclitaxel_FACS_FaDu) Note: Variables were treated as independent samples |
|--|-----------------------------------------------------------------------------------------------------------|

| Group 1 vs. Group 2      | Mean Group 1 | Mean Group 2 | t-value  | df | p        | Valid N Group 1 | Valid N Group 2 | Std.Dev. Group 1 | Std.Dev. Group 2 | F-ratio Variances | p Variances |
|--------------------------|--------------|--------------|----------|----|----------|-----------------|-----------------|------------------|------------------|-------------------|-------------|
| Control UL vs. 1 nM UL   | 1.140000     | 1.596667     | -0.49965 | 4  | 0.643555 | 3               | 3               | 0.537029         | 1.489172         | 7.68944           | 0.230165    |
| Control UL vs. 3 nM UL   | 1.140000     | 1.516667     | -0.67950 | 4  | 0.534107 | 3               | 3               | 0.537029         | 0.795885         | 2.19637           | 0.625710    |
| Control UL vs. 10 nM UL  | 1.140000     | 2.390000     | -1.86699 | 4  | 0.135302 | 3               | 3               | 0.537029         | 1.027813         | 3.66297           | 0.428911    |
| Control UL vs. 33 nM UL  | 1.140000     | 2.816667     | -1.67515 | 4  | 0.169215 | 3               | 3               | 0.537029         | 1.648343         | 9.42106           | 0.191919    |
| Control UL vs. 100 nM UL | 1.140000     | 3.300000     | -1.98160 | 4  | 0.118585 | 3               | 3               | 0.537029         | 1.810000         | 11.35957          | 0.161818    |
| 1 nM UL vs. 3 nM UL      | 1.596667     | 1.516667     | 0.08206  | 4  | 0.938539 | 3               | 3               | 1.489172         | 0.795885         | 3.50097           | 0.444348    |
| 1 nM UL vs. 10 nM UL     | 1.596667     | 2.390000     | -0.75941 | 4  | 0.489901 | 3               | 3               | 1.489172         | 1.027813         | 2.09924           | 0.645320    |
| 1 nM UL vs. 33 nM UL     | 1.596667     | 2.816667     | -0.95124 | 4  | 0.395347 | 3               | 3               | 1.489172         | 1.648343         | 1.22520           | 0.898798    |
| 1 nM UL vs. 100 nM UL    | 1.596667     | 3.300000     | -1.25871 | 4  | 0.276588 | 3               | 3               | 1.489172         | 1.810000         | 1.47730           | 0.807332    |
| 3 nM UL vs. 10 nM UL     | 1.516667     | 2.390000     | -1.16364 | 4  | 0.309250 | 3               | 3               | 0.795885         | 1.027813         | 1.66774           | 0.749699    |
| 3 nM UL vs. 33 nM UL     | 1.516667     | 2.816667     | -1.23013 | 4  | 0.286047 | 3               | 3               | 0.795885         | 1.648343         | 4.28938           | 0.378116    |
| 3 nM UL vs. 100 nM UL    | 1.516667     | 3.300000     | -1.56218 | 4  | 0.193277 | 3               | 3               | 0.795885         | 1.810000         | 5.17197           | 0.324045    |
| 10 nM UL vs. 33 nM UL    | 2.390000     | 2.816667     | -0.38044 | 4  | 0.722962 | 3               | 3               | 1.027813         | 1.648343         | 2.57197           | 0.559914    |
| 10 nM UL vs. 100 nM UL   | 2.390000     | 3.300000     | -0.75724 | 4  | 0.491064 | 3               | 3               | 1.027813         | 1.810000         | 3.10119           | 0.487663    |
| 33 nM UL vs. 100 nM UL   | 2.816667     | 3.300000     | -0.34196 | 4  | 0.749589 | 3               | 3               | 1.648343         | 1.810000         | 1.20576           | 0.906715    |

Table S12. Continuation.

| Group 1 vs. Group 2      | T-test for Independent Samples (Paclitaxel_FACS_FaDu) Note: Variables were treated as independent samples |              |          |    |          |                 |                 |                  |                  |                   |             |
|--------------------------|-----------------------------------------------------------------------------------------------------------|--------------|----------|----|----------|-----------------|-----------------|------------------|------------------|-------------------|-------------|
|                          | Mean Group 1                                                                                              | Mean Group 2 | t-value  | df | p        | Valid N Group 1 | Valid N Group 2 | Std.Dev. Group 1 | Std.Dev. Group 2 | F-ratio Variances | p Variances |
| Control UR vs. 1 nM UR   | 2.09667                                                                                                   | 2.52667      | -0.57665 | 4  | 0.595075 | 3               | 3               | 0.970429         | 0.852311         | 1.29638           | 0.870936    |
| Control UR vs. 3 nM UR   | 2.09667                                                                                                   | 3.08333      | -1.18305 | 4  | 0.302299 | 3               | 3               | 0.970429         | 1.070016         | 1.21577           | 0.902620    |
| Control UR vs. 10 nM UR  | 2.09667                                                                                                   | 6.26333      | -2.10476 | 4  | 0.103098 | 3               | 3               | 0.970429         | 3.288652         | 11.48439          | 0.160200    |
| Control UR vs. 33 nM UR  | 2.09667                                                                                                   | 9.10333      | -5.09886 | 4  | 0.006988 | 3               | 3               | 0.970429         | 2.173300         | 5.01547           | 0.332476    |
| Control UR vs. 100 nM UR | 2.09667                                                                                                   | 11.65333     | -9.89180 | 4  | 0.000586 | 3               | 3               | 0.970429         | 1.363244         | 1.97342           | 0.672627    |
| 1 nM UR vs. 3 nM UR      | 2.52667                                                                                                   | 3.08333      | -0.70482 | 4  | 0.519799 | 3               | 3               | 0.852311         | 1.070016         | 1.57610           | 0.776367    |
| 1 nM UR vs. 10 nM UR     | 2.52667                                                                                                   | 6.26333      | -1.90507 | 4  | 0.129480 | 3               | 3               | 0.852311         | 3.288652         | 14.88813          | 0.125880    |
| 1 nM UR vs. 33 nM UR     | 2.52667                                                                                                   | 9.10333      | -4.87957 | 4  | 0.008163 | 3               | 3               | 0.852311         | 2.173300         | 6.50195           | 0.266597    |

|                        |         |          |          |   |          |   |   |          |          |         |          |
|------------------------|---------|----------|----------|---|----------|---|---|----------|----------|---------|----------|
| 1 nM UR vs. 100 nM UR  | 2.52667 | 11.65333 | -9.83227 | 4 | 0.000600 | 3 | 3 | 0.852311 | 1.363244 | 2.55830 | 0.562066 |
| 3 nM UR vs. 10 nM UR   | 3.08333 | 6.26333  | -1.59265 | 4 | 0.186458 | 3 | 3 | 1.070016 | 3.288652 | 9.44617 | 0.191458 |
| 3 nM UR vs. 33 nM UR   | 3.08333 | 9.10333  | -4.30433 | 4 | 0.012602 | 3 | 3 | 1.070016 | 2.173300 | 4.12533 | 0.390218 |
| 3 nM UR vs. 100 nM UR  | 3.08333 | 11.65333 | -8.56520 | 4 | 0.001020 | 3 | 3 | 1.070016 | 1.363244 | 1.62318 | 0.762433 |
| 10 nM UR vs. 33 nM UR  | 6.26333 | 9.10333  | -1.24789 | 4 | 0.280136 | 3 | 3 | 3.288652 | 2.173300 | 2.28979 | 0.607941 |
| 10 nM UR vs. 100 nM UR | 6.26333 | 11.65333 | -2.62240 | 4 | 0.058652 | 3 | 3 | 3.288652 | 1.363244 | 5.81954 | 0.293275 |
| 33 nM UR vs. 100 nM UR | 9.10333 | 11.65333 | -1.72160 | 4 | 0.160249 | 3 | 3 | 2.173300 | 1.363244 | 2.54151 | 0.564730 |

Table S12. Continuation.

| T-test for Independent Samples (Paclitaxel_FACS_FaDu) Note: Variables were treated as independent samples |              |              |         |    |          |                 |                 |                  |                  |                   |             |
|-----------------------------------------------------------------------------------------------------------|--------------|--------------|---------|----|----------|-----------------|-----------------|------------------|------------------|-------------------|-------------|
| Group 1 vs. Group 2                                                                                       | Mean Group 1 | Mean Group 2 | t-value | df | p        | Valid N Group 1 | Valid N Group 2 | Std.Dev. Group 1 | Std.Dev. Group 2 | F-ratio Variances | p Variances |
| Control LL vs. 1 nM LL                                                                                    | 93.05333     | 91.65333     | 0.36950 | 4  | 0.730482 | 3               | 3               | 3.984098         | 5.214732         | 1.713184          | 0.737141    |
| Control LL vs. 3 nM LL                                                                                    | 93.05333     | 90.20000     | 0.76835 | 4  | 0.485128 | 3               | 3               | 3.984098         | 5.049634         | 1.606423          | 0.767335    |
| Control LL vs. 10 nM LL                                                                                   | 93.05333     | 83.40000     | 1.90838 | 4  | 0.128986 | 3               | 3               | 3.984098         | 7.803121         | 3.835984          | 0.413566    |
| Control LL vs. 33 nM LL                                                                                   | 93.05333     | 75.97667     | 4.66270 | 4  | 0.009570 | 3               | 3               | 3.984098         | 4.936237         | 1.535084          | 0.788929    |
| Control LL vs. 100 nM LL                                                                                  | 93.05333     | 70.44333     | 6.03612 | 4  | 0.003798 | 3               | 3               | 3.984098         | 5.120511         | 1.651835          | 0.754195    |
| 1 nM LL vs. 3 nM LL                                                                                       | 91.65333     | 90.20000     | 0.34678 | 4  | 0.746233 | 3               | 3               | 5.214732         | 5.049634         | 1.066459          | 0.967839    |
| 1 nM LL vs. 10 nM LL                                                                                      | 91.65333     | 83.40000     | 1.52316 | 4  | 0.202386 | 3               | 3               | 5.214732         | 7.803121         | 2.239096          | 0.617456    |
| 1 nM LL vs. 33 nM LL                                                                                      | 91.65333     | 75.97667     | 3.78145 | 4  | 0.019411 | 3               | 3               | 5.214732         | 4.936237         | 1.116020          | 0.945171    |
| 1 nM LL vs. 100 nM LL                                                                                     | 91.65333     | 70.44333     | 5.02664 | 4  | 0.007351 | 3               | 3               | 5.214732         | 5.120511         | 1.037140          | 0.981769    |
| 3 nM LL vs. 10 nM LL                                                                                      | 90.20000     | 83.40000     | 1.26720 | 4  | 0.273838 | 3               | 3               | 5.049634         | 7.803121         | 2.387905          | 0.590335    |
| 3 nM LL vs. 33 nM LL                                                                                      | 90.20000     | 75.97667     | 3.48870 | 4  | 0.025153 | 3               | 3               | 5.049634         | 4.936237         | 1.046472          | 0.977291    |
| 3 nM LL vs. 100 nM LL                                                                                     | 90.20000     | 70.44333     | 4.75830 | 4  | 0.008916 | 3               | 3               | 5.049634         | 5.120511         | 1.028269          | 0.986062    |
| 10 nM LL vs. 33 nM LL                                                                                     | 83.40000     | 75.97667     | 1.39251 | 4  | 0.236182 | 3               | 3               | 7.803121         | 4.936237         | 2.498876          | 0.571612    |
| 10 nM LL vs. 100 nM LL                                                                                    | 83.40000     | 70.44333     | 2.40450 | 4  | 0.073995 | 3               | 3               | 7.803121         | 5.120511         | 2.322256          | 0.602001    |
| 33 nM LL vs. 100 nM LL                                                                                    | 75.97667     | 70.44333     | 1.34751 | 4  | 0.249083 | 3               | 3               | 4.936237         | 5.120511         | 1.076055          | 0.963365    |

Table S12. Continuation.

| Group 1 vs. Group 2      | T-test for Independent Samples (Paclitaxel_FACS_FaDu) Note: Variables were treated as independent samples |              |          |    |          |                 |                 |                  |                  |                   |             |
|--------------------------|-----------------------------------------------------------------------------------------------------------|--------------|----------|----|----------|-----------------|-----------------|------------------|------------------|-------------------|-------------|
|                          | Mean Group 1                                                                                              | Mean Group 2 | t-value  | df | p        | Valid N Group 1 | Valid N Group 2 | Std.Dev. Group 1 | Std.Dev. Group 2 | F-ratio Variances | p Variances |
| Control LR vs. 1 nM LR   | 3.71667                                                                                                   | 4.22333      | -0.21880 | 4  | 0.837517 | 3               | 3               | 2.624430         | 3.033057         | 1.335645          | 0.856294    |
| Control LR vs. 3 nM LR   | 3.71667                                                                                                   | 5.20333      | -0.61130 | 4  | 0.574035 | 3               | 3               | 2.624430         | 3.294819         | 1.576134          | 0.776357    |
| Control LR vs. 10 nM LR  | 3.71667                                                                                                   | 7.94333      | -1.39813 | 4  | 0.234620 | 3               | 3               | 2.624430         | 4.530964         | 2.980651          | 0.502430    |
| Control LR vs. 33 nM LR  | 3.71667                                                                                                   | 12.10000     | -2.87316 | 4  | 0.045324 | 3               | 3               | 2.624430         | 4.318935         | 2.708216          | 0.539343    |
| Control LR vs. 100 nM LR | 3.71667                                                                                                   | 14.60667     | -3.65887 | 4  | 0.021602 | 3               | 3               | 2.624430         | 4.437120         | 2.858461          | 0.518341    |
| 1 nM LR vs. 3 nM LR      | 4.22333                                                                                                   | 5.20333      | -0.37903 | 4  | 0.723927 | 3               | 3               | 3.033057         | 3.294819         | 1.180055          | 0.917408    |
| 1 nM LR vs. 10 nM LR     | 4.22333                                                                                                   | 7.94333      | -1.18172 | 4  | 0.302773 | 3               | 3               | 3.033057         | 4.530964         | 2.231619          | 0.618885    |
| 1 nM LR vs. 33 nM LR     | 4.22333                                                                                                   | 12.10000     | -2.58506 | 4  | 0.061001 | 3               | 3               | 3.033057         | 4.318935         | 2.027647          | 0.660579    |
| 1 nM LR vs. 100 nM LR    | 4.22333                                                                                                   | 14.60667     | -3.34613 | 4  | 0.028672 | 3               | 3               | 3.033057         | 4.437120         | 2.140135          | 0.636915    |
| 3 nM LR vs. 10 nM LR     | 5.20333                                                                                                   | 7.94333      | -0.84712 | 4  | 0.444636 | 3               | 3               | 3.294819         | 4.530964         | 1.891115          | 0.691775    |
| 3 nM LR vs. 33 nM LR     | 5.20333                                                                                                   | 12.10000     | -2.19899 | 4  | 0.092758 | 3               | 3               | 3.294819         | 4.318935         | 1.718265          | 0.735763    |
| 3 nM LR vs. 100 nM LR    | 5.20333                                                                                                   | 14.60667     | -2.94700 | 4  | 0.042095 | 3               | 3               | 3.294819         | 4.437120         | 1.813590          | 0.710836    |
| 10 nM LR vs. 33 nM LR    | 7.94333                                                                                                   | 12.10000     | -1.15016 | 4  | 0.314163 | 3               | 3               | 4.530964         | 4.318935         | 1.100596          | 0.952111    |
| 10 nM LR vs. 100 nM LR   | 7.94333                                                                                                   | 14.60667     | -1.81988 | 4  | 0.142896 | 3               | 3               | 4.530964         | 4.437120         | 1.042747          | 0.979074    |
| 33 nM LR vs. 100 nM LR   | 12.10000                                                                                                  | 14.60667     | -0.70117 | 4  | 0.521842 | 3               | 3               | 4.318935         | 4.437120         | 1.055478          | 0.973010    |

**Table S13.** Paclitaxel-induced apoptosis of SCC25 cells. Annexin V-FLUOS/PI (Ann/PI)-stained HNSCC cells were analyzed by FACS after 48 h of treatment with paclitaxel at different concentrations. Live cells are presented by the Ann-/PI- fraction (LL), apoptotic cells by the Ann+/PI- fraction (LR), secondary necrotic cells by the Ann+/PI+ fraction (UR) and primary necrotic cells are detected in the Ann-/PI+ fraction (UL). Statistical analysis was performed by Student's t-test, the cell fractions in all concentration were compared to control fractions in each cell line. Red color indicate if  $p < 0.05$ . (Figure 3).

| Group 1 vs. Group 2     | T-test for Independent Samples (Paclitaxel_FACS_SCC25) Note: Variables were treated as independent samples |              |          |    |          |                 |                 |                  |                  |                   |             |
|-------------------------|------------------------------------------------------------------------------------------------------------|--------------|----------|----|----------|-----------------|-----------------|------------------|------------------|-------------------|-------------|
|                         | Mean Group 1                                                                                               | Mean Group 2 | t-value  | df | p        | Valid N Group 1 | Valid N Group 2 | Std.Dev. Group 1 | Std.Dev. Group 2 | F-ratio Variances | p Variances |
| Control UL vs. 1 nM UL  | 0.966667                                                                                                   | 1.110000     | -0.16935 | 4  | 0.873743 | 3               | 3               | 1.050825         | 1.022204         | 1.056784          | 0.972392    |
| Control UL vs. 3 nM UL  | 0.966667                                                                                                   | 1.370000     | -0.47589 | 4  | 0.658978 | 3               | 3               | 1.050825         | 1.025037         | 1.050950          | 0.975158    |
| Control UL vs. 10 nM UL | 0.966667                                                                                                   | 2.960000     | -1.50734 | 4  | 0.206203 | 3               | 3               | 1.050825         | 2.035215         | 3.751109          | 0.420954    |

|                          |          |          |          |   |          |   |   |          |          |          |          |
|--------------------------|----------|----------|----------|---|----------|---|---|----------|----------|----------|----------|
| Control UL vs. 33 nM UL  | 0.966667 | 3.210000 | -1.45288 | 4 | 0.219912 | 3 | 3 | 1.050825 | 2.459289 | 5.477194 | 0.308776 |
| Control UL vs. 100 nM UL | 0.966667 | 3.786667 | -1.51991 | 4 | 0.203164 | 3 | 3 | 1.050825 | 3.036928 | 8.352341 | 0.213850 |
| 1 nM UL vs. 3 nM UL      | 1.110000 | 1.370000 | -0.31109 | 4 | 0.771273 | 3 | 3 | 1.022204 | 1.025037 | 1.005551 | 0.997232 |
| 1 nM UL vs. 10 nM UL     | 1.110000 | 2.960000 | -1.40694 | 4 | 0.232189 | 3 | 3 | 1.022204 | 2.035215 | 3.964111 | 0.402892 |
| 1 nM UL vs. 33 nM UL     | 1.110000 | 3.210000 | -1.36573 | 4 | 0.243778 | 3 | 3 | 1.022204 | 2.459289 | 5.788209 | 0.294629 |
| 1 nM UL vs. 100 nM UL    | 1.110000 | 3.786667 | -1.44682 | 4 | 0.221493 | 3 | 3 | 1.022204 | 3.036928 | 8.826618 | 0.203529 |
| 3 nM UL vs. 10 nM UL     | 1.370000 | 2.960000 | -1.20853 | 4 | 0.293400 | 3 | 3 | 1.025037 | 2.035215 | 3.942229 | 0.404676 |
| 3 nM UL vs. 33 nM UL     | 1.370000 | 3.210000 | -1.19615 | 4 | 0.297693 | 3 | 3 | 1.025037 | 2.459289 | 5.756258 | 0.296022 |
| 3 nM UL vs. 100 nM UL    | 1.370000 | 3.786667 | -1.30592 | 4 | 0.261619 | 3 | 3 | 1.025037 | 3.036928 | 8.777894 | 0.204543 |
| 10 nM UL vs. 33 nM UL    | 2.960000 | 3.210000 | -0.13565 | 4 | 0.898653 | 3 | 3 | 2.035215 | 2.459289 | 1.460153 | 0.812958 |
| 10 nM UL vs. 100 nM UL   | 2.960000 | 3.786667 | -0.39166 | 4 | 0.715281 | 3 | 3 | 2.035215 | 3.036928 | 2.226632 | 0.619841 |
| 33 nM UL vs. 100 nM UL   | 3.210000 | 3.786667 | -0.25559 | 4 | 0.810869 | 3 | 3 | 2.459289 | 3.036928 | 1.524931 | 0.792101 |

Table S13. Continuation.

| Group 1 vs. Group 2      | T-test for Independent Samples (Paclitaxel_FACS_SCC25) Note: Variables were treated as independent samples |              |          |    |          |                 |                 |                  |                  |                   |             |
|--------------------------|------------------------------------------------------------------------------------------------------------|--------------|----------|----|----------|-----------------|-----------------|------------------|------------------|-------------------|-------------|
|                          | Mean Group 1                                                                                               | Mean Group 2 | t-value  | df | p        | Valid N Group 1 | Valid N Group 2 | Std.Dev. Group 1 | Std.Dev. Group 2 | F-ratio Variances | p Variances |
| Control UR vs. 1 nM UR   | 8.42667                                                                                                    | 8.15333      | 0.03122  | 4  | 0.976589 | 3               | 3               | 11.92846         | 9.36197          | 1.623434          | 0.762359    |
| Control UR vs. 3 nM UR   | 8.42667                                                                                                    | 10.60000     | -0.26045 | 4  | 0.807377 | 3               | 3               | 11.92846         | 8.16149          | 2.136142          | 0.637726    |
| Control UR vs. 10 nM UR  | 8.42667                                                                                                    | 19.35333     | -1.36899 | 4  | 0.242839 | 3               | 3               | 11.92846         | 6.98756          | 2.914188          | 0.510962    |
| Control UR vs. 33 nM UR  | 8.42667                                                                                                    | 28.08667     | -1.85445 | 4  | 0.137281 | 3               | 3               | 11.92846         | 13.96032         | 1.369688          | 0.843993    |
| Control UR vs. 100 nM UR | 8.42667                                                                                                    | 36.07333     | -2.07016 | 4  | 0.107211 | 3               | 3               | 11.92846         | 19.81836         | 2.760363          | 0.531863    |
| 1 nM UR vs. 3 nM UR      | 8.15333                                                                                                    | 10.60000     | -0.34120 | 4  | 0.750120 | 3               | 3               | 9.36197          | 8.16149          | 1.315817          | 0.863626    |
| 1 nM UR vs. 10 nM UR     | 8.15333                                                                                                    | 19.35333     | -1.66057 | 4  | 0.172138 | 3               | 3               | 9.36197          | 6.98756          | 1.795076          | 0.715544    |
| 1 nM UR vs. 33 nM UR     | 8.15333                                                                                                    | 28.08667     | -2.05401 | 4  | 0.109192 | 3               | 3               | 9.36197          | 13.96032         | 2.223599          | 0.620425    |
| 1 nM UR vs. 100 nM UR    | 8.15333                                                                                                    | 36.07333     | -2.20632 | 4  | 0.092002 | 3               | 3               | 9.36197          | 19.81836         | 4.481269          | 0.364879    |
| 3 nM UR vs. 10 nM UR     | 10.60000                                                                                                   | 19.35333     | -1.41112 | 4  | 0.231043 | 3               | 3               | 8.16149          | 6.98756          | 1.364229          | 0.845942    |
| 3 nM UR vs. 33 nM UR     | 10.60000                                                                                                   | 28.08667     | -1.87297 | 4  | 0.134368 | 3               | 3               | 8.16149          | 13.96032         | 2.925849          | 0.509444    |
| 3 nM UR vs. 100 nM UR    | 10.60000                                                                                                   | 36.07333     | -2.05855 | 4  | 0.108631 | 3               | 3               | 8.16149          | 19.81836         | 5.896529          | 0.290001    |

|                        |          |          |          |   |          |   |   |          |          |          |          |
|------------------------|----------|----------|----------|---|----------|---|---|----------|----------|----------|----------|
| 10 nM UR vs. 33 nM UR  | 19.35333 | 28.08667 | -0.96894 | 4 | 0.387442 | 3 | 3 | 6.98756  | 13.96032 | 3.991529 | 0.400679 |
| 10 nM UR vs. 100 nM UR | 19.35333 | 36.07333 | -1.37812 | 4 | 0.240236 | 3 | 3 | 6.98756  | 19.81836 | 8.044218 | 0.221136 |
| 33 nM UR vs. 100 nM UR | 28.08667 | 36.07333 | -0.57064 | 4 | 0.598770 | 3 | 3 | 13.96032 | 19.81836 | 2.015322 | 0.663279 |

Table S13. Continuation.

| Group 1 vs. Group 2      | T-test for Independent Samples (Paclitaxel_FACS_SCC25) Note: Variables were treated as independent samples |              |         |    |          |                 |                 |                  |                  |                   |             |
|--------------------------|------------------------------------------------------------------------------------------------------------|--------------|---------|----|----------|-----------------|-----------------|------------------|------------------|-------------------|-------------|
|                          | Mean Group 1                                                                                               | Mean Group 2 | t-value | df | p        | Valid N Group 1 | Valid N Group 2 | Std.Dev. Group 1 | Std.Dev. Group 2 | F-ratio Variances | p Variances |
| Control LL vs. 1 nM LL   | 88.19333                                                                                                   | 87.74000     | 0.05461 | 4  | 0.959069 | 3               | 3               | 11.68871         | 8.37375          | 1.94847           | 0.678319    |
| Control LL vs. 3 nM LL   | 88.19333                                                                                                   | 81.81000     | 0.82941 | 4  | 0.453499 | 3               | 3               | 11.68871         | 6.40850          | 3.32675           | 0.462241    |
| Control LL vs. 10 nM LL  | 88.19333                                                                                                   | 62.58667     | 3.49569 | 4  | 0.024994 | 3               | 3               | 11.68871         | 4.93463          | 5.61079           | 0.302536    |
| Control LL vs. 33 nM LL  | 88.19333                                                                                                   | 47.91667     | 3.96212 | 4  | 0.016648 | 3               | 3               | 11.68871         | 13.16750         | 1.26904           | 0.881432    |
| Control LL vs. 100 nM LL | 88.19333                                                                                                   | 35.98000     | 4.36533 | 4  | 0.012012 | 3               | 3               | 11.68871         | 17.10453         | 2.14136           | 0.636667    |
| 1 nM LL vs. 3 nM LL      | 87.74000                                                                                                   | 81.81000     | 0.97406 | 4  | 0.385183 | 3               | 3               | 8.37375          | 6.40850          | 1.70737           | 0.738725    |
| 1 nM LL vs. 10 nM LL     | 87.74000                                                                                                   | 62.58667     | 4.48238 | 4  | 0.010970 | 3               | 3               | 8.37375          | 4.93463          | 2.87960           | 0.515518    |
| 1 nM LL vs. 33 nM LL     | 87.74000                                                                                                   | 47.91667     | 4.42024 | 4  | 0.011509 | 3               | 3               | 8.37375          | 13.16750         | 2.47267           | 0.575925    |
| 1 nM LL vs. 100 nM LL    | 87.74000                                                                                                   | 35.98000     | 4.70750 | 4  | 0.009257 | 3               | 3               | 8.37375          | 17.10453         | 4.17237           | 0.386670    |
| 3 nM LL vs. 10 nM LL     | 81.81000                                                                                                   | 62.58667     | 4.11657 | 4  | 0.014653 | 3               | 3               | 6.40850          | 4.93463          | 1.68657           | 0.744443    |
| 3 nM LL vs. 33 nM LL     | 81.81000                                                                                                   | 47.91667     | 4.00876 | 4  | 0.016013 | 3               | 3               | 6.40850          | 13.16750         | 4.22176           | 0.383013    |
| 3 nM LL vs. 100 nM LL    | 81.81000                                                                                                   | 35.98000     | 4.34586 | 4  | 0.012197 | 3               | 3               | 6.40850          | 17.10453         | 7.12376           | 0.246191    |
| 10 nM LL vs. 33 nM LL    | 62.58667                                                                                                   | 47.91667     | 1.80697 | 4  | 0.145058 | 3               | 3               | 4.93463          | 13.16750         | 7.12030           | 0.246296    |
| 10 nM LL vs. 100 nM LL   | 62.58667                                                                                                   | 35.98000     | 2.58869 | 4  | 0.060768 | 3               | 3               | 4.93463          | 17.10453         | 12.01473          | 0.153672    |
| 33 nM LL vs. 100 nM LL   | 47.91667                                                                                                   | 35.98000     | 0.95780 | 4  | 0.392403 | 3               | 3               | 13.16750         | 17.10453         | 1.68739           | 0.744216    |

Table 13. Continuation.

| Group 1 vs. Group 2    | T-test for Independent Samples (Paclitaxel_FACS_SCC25) Note: Variables were treated as independent samples |              |          |    |          |                 |                 |                  |                  |                   |             |
|------------------------|------------------------------------------------------------------------------------------------------------|--------------|----------|----|----------|-----------------|-----------------|------------------|------------------|-------------------|-------------|
|                        | Mean Group 1                                                                                               | Mean Group 2 | t-value  | df | p        | Valid N Group 1 | Valid N Group 2 | Std.Dev. Group 1 | Std.Dev. Group 2 | F-ratio Variances | p Variances |
| Control LR vs. 1 nM LR | 2.41000                                                                                                    | 3.00000      | -0.95356 | 4  | 0.394305 | 3               | 3               | 0.28583          | 1.03286          | 13.058            | 0.142273    |
| Control LR vs. 3 nM LR | 2.41000                                                                                                    | 6.22000      | -2.42608 | 4  | 0.072286 | 3               | 3               | 0.28583          | 2.70501          | 89.561            | 0.022085    |

|                          |          |          |          |   |          |   |   |         |          |          |          |
|--------------------------|----------|----------|----------|---|----------|---|---|---------|----------|----------|----------|
| Control LR vs. 10 nM LR  | 2.41000  | 15.10000 | -3.18116 | 4 | 0.033498 | 3 | 3 | 0.28583 | 6.90342  | 583.319  | 0.003423 |
| Control LR vs. 33 nM LR  | 2.41000  | 20.78333 | -3.47716 | 4 | 0.025418 | 3 | 3 | 0.28583 | 9.14771  | 1024.243 | 0.001951 |
| Control LR vs. 100 nM LR | 2.41000  | 24.16333 | -3.39748 | 4 | 0.027341 | 3 | 3 | 0.28583 | 11.08627 | 1504.350 | 0.001329 |
| 1 nM LR vs. 3 nM LR      | 3.00000  | 6.22000  | -1.92616 | 4 | 0.126372 | 3 | 3 | 1.03286 | 2.70501  | 6.859    | 0.254488 |
| 1 nM LR vs. 10 nM LR     | 3.00000  | 15.10000 | -3.00244 | 4 | 0.039846 | 3 | 3 | 1.03286 | 6.90342  | 44.673   | 0.043790 |
| 1 nM LR vs. 33 nM LR     | 3.00000  | 20.78333 | -3.34588 | 4 | 0.028678 | 3 | 3 | 1.03286 | 9.14771  | 78.441   | 0.025176 |
| 1 nM LR vs. 100 nM LR    | 3.00000  | 24.16333 | -3.29217 | 4 | 0.030154 | 3 | 3 | 1.03286 | 11.08627 | 115.209  | 0.017210 |
| 3 nM LR vs. 10 nM LR     | 6.22000  | 15.10000 | -2.07441 | 4 | 0.106696 | 3 | 3 | 2.70501 | 6.90342  | 6.513    | 0.266201 |
| 3 nM LR vs. 33 nM LR     | 6.22000  | 20.78333 | -2.64427 | 4 | 0.057324 | 3 | 3 | 2.70501 | 9.14771  | 11.436   | 0.160819 |
| 3 nM LR vs. 100 nM LR    | 6.22000  | 24.16333 | -2.72346 | 4 | 0.052798 | 3 | 3 | 2.70501 | 11.08627 | 16.797   | 0.112378 |
| 10 nM LR vs. 33 nM LR    | 15.10000 | 20.78333 | -0.85895 | 4 | 0.438794 | 3 | 3 | 6.90342 | 9.14771  | 1.756    | 0.725719 |
| 10 nM LR vs. 100 nM LR   | 15.10000 | 24.16333 | -1.20201 | 4 | 0.295655 | 3 | 3 | 6.90342 | 11.08627 | 2.579    | 0.558823 |
| 33 nM LR vs. 100 nM LR   | 20.78333 | 24.16333 | -0.40731 | 4 | 0.704634 | 3 | 3 | 9.14771 | 11.08627 | 1.469    | 0.810129 |



**Table S14.** Changes in the levels of Cx43 and Bcl-2 after *GJA1* siRNA knockdown in HNSCC cell lines. Densitometry analysis was performed using three independent experiments. The expression of all proteins were compared to expression of the non-targeting siRNA treated negative controls, after normalization to  $\alpha$ -tubulin. (Figure 4C).

| Cell line   | non-targ. siRNA | <i>GJA1</i> siRNA | Densitometry intensity of Cx43        |           |           |          |          |
|-------------|-----------------|-------------------|---------------------------------------|-----------|-----------|----------|----------|
|             |                 |                   | Sample1                               | Sample2   | Sample3   | Mean     | SD       |
| Detroit 562 | -               | +                 | 2033.376                              | 14413.075 | 24682.217 | 13709.56 | 11340.80 |
|             | +               | -                 | 27350.489                             | 36386.229 | 46415.735 | 36717.48 | 9536.94  |
| FaDu        | -               | +                 | 238.536                               | 1096.506  | 484.243   | 606.43   | 441.84   |
|             | +               | -                 | 18180.175                             | 17670.468 | 23580.338 | 19810.33 | 3274.86  |
| SCC25       | -               | +                 | 225.95                                | 153.243   | 271.657   | 216.95   | 59.72    |
|             | +               | -                 | 46966.037                             | 52617.38  | 39347.702 | 46310.37 | 6659.09  |
| Cell line   | non-targ. siRNA | <i>GJA1</i> siRNA | Densitometry intensity ratio of Cx43  |           |           |          |          |
|             |                 |                   | Sample1                               | Sample2   | Sample3   | Mean     | SD       |
| Detroit 562 | -               | +                 | 0.07                                  | 0.40      | 0.53      | 0.33     | 0.23     |
|             | +               | -                 | 1.00                                  | 1.00      | 1.00      | 1.00     | 0.00     |
| FaDu        | -               | +                 | 0.01                                  | 0.06      | 0.02      | 0.03     | 0.03     |
|             | +               | -                 | 1.00                                  | 1.00      | 1.00      | 1.00     | 0.00     |
| SCC25       | -               | +                 | 0.005                                 | 0.003     | 0.007     | 0.005    | 0.002    |
|             | +               | -                 | 1.00                                  | 1.00      | 1.00      | 1.00     | 0.00     |
| Cell line   | non-targ. siRNA | <i>GJA1</i> siRNA | Densitometry intensity of Bcl-2       |           |           |          |          |
|             |                 |                   | Sample1                               | Sample2   | Sample3   | Mean     | SD       |
| Detroit 562 | -               | +                 | 39833.158                             | 26670.439 | 54567.765 | 40357.12 | 13956.04 |
|             | +               | -                 | 47683.087                             | 32929.752 | 55872.451 | 45495.10 | 11626.79 |
| FaDu        | -               | +                 | 46459.451                             | 20580.246 | 39330.894 | 35456.86 | 13367.48 |
|             | +               | -                 | 47085.693                             | 22408.539 | 41324.48  | 36939.57 | 12909.73 |
| SCC25       | -               | +                 | 36417.706                             | 3267.276  | 38347.643 | 26010.88 | 19720.16 |
|             | +               | -                 | 19374.037                             | 1843.255  | 22078.865 | 14432.05 | 10985.78 |
| Cell line   | non-targ. siRNA | <i>GJA1</i> siRNA | Densitometry intensity ratio of Bcl-2 |           |           |          |          |
|             |                 |                   | Sample1                               | Sample2   | Sample3   | Mean     | SD       |
| Detroit 562 | -               | +                 | 0.84                                  | 0.81      | 0.98      | 0.87     | 0.09     |
|             | +               | -                 | 1.00                                  | 1.00      | 1.00      | 1.00     | 0.00     |
| FaDu        | -               | +                 | 0.99                                  | 0.92      | 0.95      | 0.95     | 0.03     |
|             | +               | -                 | 1.00                                  | 1.00      | 1.00      | 1.00     | 0.00     |
| SCC25       | -               | +                 | 1.88                                  | 1.77      | 1.74      | 1.80     | 0.07     |

|             | +               | -          | 1.00                                        | 1.00      | 1.00      | 1.00     | 0.00     |
|-------------|-----------------|------------|---------------------------------------------|-----------|-----------|----------|----------|
| Cell line   | non-targ. siRNA | GJA1 siRNA | Densitometry intensity of $\alpha$ -tubulin |           |           |          |          |
|             |                 |            | Sample1                                     | Sample2   | Sample3   | Mean     | SD       |
| Detroit 562 | -               | +          | 38601.622                                   | 81183.655 | 42655.288 | 54146.86 | 23502.12 |
|             | +               | -          | 35977.116                                   | 45325.2   | 45023.409 | 42108.58 | 5312.14  |
| FaDu        | -               | +          | 57659.966                                   | 63378.676 | 68391.2   | 63143.28 | 5369.49  |
|             | +               | -          | 59575.35                                    | 62569.856 | 65162.886 | 62436.03 | 2796.17  |
| SCC25       | -               | +          | 44299.773                                   | 53958.815 | 45026.48  | 47761.69 | 5379.15  |
|             | +               | -          | 47016.238                                   | 52371.915 | 46102.066 | 48496.74 | 3386.98  |

Table S14. Continuation.

| Cell line   | non-targ. siRNA | GJA1 siRNA | Densitometry intensity ratio of $\alpha$ -tubulin |         |         |      |      |
|-------------|-----------------|------------|---------------------------------------------------|---------|---------|------|------|
|             |                 |            | Sample1                                           | Sample2 | Sample3 | Mean | SD   |
| Detroit 562 | -               | +          | 1.07                                              | 1.79    | 0.95    | 1.27 | 0.46 |
|             | +               | -          | 1.00                                              | 1.00    | 1.00    | 1.00 | 0.00 |
| FaDu        | -               | +          | 0.97                                              | 1.01    | 1.05    | 1.01 | 0.04 |
|             | +               | -          | 1.00                                              | 1.00    | 1.00    | 1.00 | 0.00 |
| SCC25       | -               | +          | 0.94                                              | 1.03    | 0.98    | 0.98 | 0.04 |
|             | +               | -          | 1.00                                              | 1.00    | 1.00    | 1.00 | 0.00 |

  

| Cell line   | non-targ. siRNA | GJA1 siRNA | Densitometry intensity ratio of Cx43 after normalization to $\alpha$ -tubulin |         |         |      |       |
|-------------|-----------------|------------|-------------------------------------------------------------------------------|---------|---------|------|-------|
|             |                 |            | Sample1                                                                       | Sample2 | Sample3 | Mean | SD    |
| Detroit 562 | -               | +          | 0.07                                                                          | 0.22    | 0.56    | 0.28 | 0.25  |
|             | +               | -          | 1.00                                                                          | 1.00    | 1.00    | 1.00 | 0.00  |
| FaDu        | -               | +          | 0.01                                                                          | 0.06    | 0.02    | 0.03 | 0.03  |
|             | +               | -          | 1.00                                                                          | 1.00    | 1.00    | 1.00 | 0.00  |
| SCC25       | -               | +          | 0.01                                                                          | 0.003   | 0.01    | 0.01 | 0.002 |
|             | +               | -          | 1.00                                                                          | 1.00    | 1.00    | 1.00 | 0.00  |

  

| Cell line   | non-targ. siRNA | GJA1 siRNA | Densitometry intensity ratio of Bcl-2 after normalization to $\alpha$ -tubulin |         |         |      |      |
|-------------|-----------------|------------|--------------------------------------------------------------------------------|---------|---------|------|------|
|             |                 |            | Sample1                                                                        | Sample2 | Sample3 | Mean | SD   |
| Detroit 562 | -               | +          | 0.78                                                                           | 0.45    | 1.03    | 0.75 | 0.29 |
|             | +               | -          | 1.00                                                                           | 1.00    | 1.00    | 1.00 | 0.00 |
| FaDu        | -               | +          | 1.02                                                                           | 0.91    | 0.91    | 0.94 | 0.07 |
|             | +               | -          | 1.00                                                                           | 1.00    | 1.00    | 1.00 | 0.00 |
| SCC25       | -               | +          | 1.99                                                                           | 1.72    | 1.78    | 1.83 | 0.14 |

|   |   |      |      |      |      |      |
|---|---|------|------|------|------|------|
| + | - | 1.00 | 1.00 | 1.00 | 1.00 | 0.00 |
|---|---|------|------|------|------|------|

**Table S15.** Changes in the levels of Cx43 and Bcl-2 after *GJA1* siRNA knockdown in HNSCC cell lines. Statistical analysis was performed by Student’s t-test, in each cell line the expression of all proteins in *GJA1* siRNA treated samples were compared to protein expression in non-targeting siRNA treated samples. Red color indicate if  $p < 0.05$ . (Figure 4C).

| Group 1 vs. Group 2                                                    | T-test for Independent Samples (Cx43, Bcl2 siRNA) Note: Variables were treated as independent samples |              |          |    |          |     |     |                  |                  |                   |             |
|------------------------------------------------------------------------|-------------------------------------------------------------------------------------------------------|--------------|----------|----|----------|-----|-----|------------------|------------------|-------------------|-------------|
|                                                                        | Mean Group 1                                                                                          | Mean Group 2 | t-value  | df | p        | N 1 | N 2 | Std.Dev. Group 1 | Std.Dev. Group 2 | F-ratio Variances | p Variances |
| Detroit 562 siCx43 Cx43/tubulin vs. Detroit 562 siControl Cx43/tubulin | 0.283333                                                                                              | 1.000000     | -4.94416 | 4  | 0.007794 | 3   | 3   | 0.251064         | 0.00             | 0.00              | 1.000000    |

| Group 1 vs. Group 2                                                    | T-test for Independent Samples (Cx43, Bcl2 siRNA) Note: Variables were treated as independent samples |              |          |    |          |     |     |                  |                  |                   |             |
|------------------------------------------------------------------------|-------------------------------------------------------------------------------------------------------|--------------|----------|----|----------|-----|-----|------------------|------------------|-------------------|-------------|
|                                                                        | Mean Group 1                                                                                          | Mean Group 2 | t-value  | df | p        | N 1 | N 2 | Std.Dev. Group 1 | Std.Dev. Group 2 | F-ratio Variances | p Variances |
| Detroit 562 siCx43 Bcl2/tubulin vs. Detroit 562 siControl Bcl2/tubulin | 0.753333                                                                                              | 1.000000     | -1.46859 | 4  | 0.215867 | 3   | 3   | 0.290918         | 0.00             | 0.00              | 1.000000    |

| Group 1 vs. Group 2                                      | T-test for Independent Samples (Cx43, Bcl2 siRNA) Note: Variables were treated as independent samples |              |          |    |          |     |     |                  |                  |                   |             |
|----------------------------------------------------------|-------------------------------------------------------------------------------------------------------|--------------|----------|----|----------|-----|-----|------------------|------------------|-------------------|-------------|
|                                                          | Mean Group 1                                                                                          | Mean Group 2 | t-value  | df | p        | N 1 | N 2 | Std.Dev. Group 1 | Std.Dev. Group 2 | F-ratio Variances | p Variances |
| FaDu siCx43 Cx43/tubulin vs. FaDu siControl Cx43/tubulin | 0.030000                                                                                              | 1.000000     | -63.5014 | 4  | 0.000000 | 3   | 3   | 0.026458         | 0.00             | 0.00              | 1.000000    |

| Group 1 vs. Group 2                                      | T-test for Independent Samples (Cx43, Bcl2 siRNA) Note: Variables were treated as independent samples |              |          |    |          |     |     |                  |                  |                   |             |
|----------------------------------------------------------|-------------------------------------------------------------------------------------------------------|--------------|----------|----|----------|-----|-----|------------------|------------------|-------------------|-------------|
|                                                          | Mean Group 1                                                                                          | Mean Group 2 | t-value  | df | p        | N 1 | N 2 | Std.Dev. Group 1 | Std.Dev. Group 2 | F-ratio Variances | p Variances |
| FaDu siCx43 Bcl2/tubulin vs. FaDu siControl Bcl2/tubulin | 0.946667                                                                                              | 1.000000     | -1.45455 | 4  | 0.219480 | 3   | 3   | 0.063509         | 0.00             | 0.00              | 1.000000    |

| Group 1 vs. Group 2                                        | T-test for Independent Samples (Cx43, Bcl2 siRNA) Note: Variables were treated as independent samples |              |          |    |          |     |     |                  |                  |                   |             |
|------------------------------------------------------------|-------------------------------------------------------------------------------------------------------|--------------|----------|----|----------|-----|-----|------------------|------------------|-------------------|-------------|
|                                                            | Mean Group 1                                                                                          | Mean Group 2 | t-value  | df | p        | N 1 | N 2 | Std.Dev. Group 1 | Std.Dev. Group 2 | F-ratio Variances | p Variances |
| SCC25 siCx43 Cx43/tubulin vs. SCC25 siControl Cx43/tubulin | 0.007667                                                                                              | 1.000000     | -425.286 | 4  | 0.000000 | 3   | 3   | 0.004041         | 0.00             | 0.00              | 1.000000    |

| Group 1 vs. Group 2                                        | T-test for Independent Samples (Cx43, Bcl2 siRNA) Note: Variables were treated as independent samples |              |          |    |          |     |     |                  |                  |                   |             |
|------------------------------------------------------------|-------------------------------------------------------------------------------------------------------|--------------|----------|----|----------|-----|-----|------------------|------------------|-------------------|-------------|
|                                                            | Mean Group 1                                                                                          | Mean Group 2 | t-value  | df | p        | N 1 | N 2 | Std.Dev. Group 1 | Std.Dev. Group 2 | F-ratio Variances | p Variances |
| SCC25 siCx43 Bcl2/tubulin vs. SCC25 siControl Bcl2/tubulin | 1.830000                                                                                              | 1.000000     | 10.14006 | 4  | 0.000533 | 3   | 3   | 0.141774         | 0.00             | 0.00              | 1.000000    |

**Table S16.** Changes in the levels of Cx43 and Bcl-2 after Cx43 plasmid transfection in HNSCC cell lines. Densitometry analysis was performed using three independent experiments. The expression of all proteins were compared to expression of the control plasmid treated controls, after normalization to  $\alpha$ -tubulin. (Figure 4C).

| Cell line | control plasmid | Cx43 plasmid | Densitometry intensity of Cx43 |         |         |      |    |
|-----------|-----------------|--------------|--------------------------------|---------|---------|------|----|
|           |                 |              | Sample1                        | Sample2 | Sample3 | Mean | SD |

| Detroit 562 | +               | -            | 12927.246                                   | 17727.773 | 443.192   | 10366.07 | 8922.38  |
|-------------|-----------------|--------------|---------------------------------------------|-----------|-----------|----------|----------|
|             | -               | +            | 15706.459                                   | 40611.016 | 1401.355  | 19239.61 | 19842.17 |
| FaDu        | +               | -            | 7167.296                                    | 3659.983  | 1599.335  | 4142.20  | 2815.13  |
|             | -               | +            | 46062.057                                   | 85854.182 | 28102.643 | 53339.63 | 29555.58 |
| SCC25       | +               | -            | 83349.141                                   | 21344.338 | 15950.116 | 40214.53 | 37452.91 |
|             | -               | +            | 89663.534                                   | 44354.551 | 33706.794 | 55908.29 | 29713.73 |
| Cell line   | control plasmid | Cx43 plasmid | Densitometry intensity ratio of Cx43        |           |           |          |          |
|             |                 |              | Sample1                                     | Sample2   | Sample3   | Mean     | SD       |
| Detroit 562 | +               | -            | 1.00                                        | 1.00      | 1.00      | 1.00     | 0.00     |
|             | -               | +            | 1.21                                        | 2.29      | 3.16      | 2.22     | 0.98     |
| FaDu        | +               | -            | 1.00                                        | 1.00      | 1.00      | 1.00     | 0.00     |
|             | -               | +            | 6.43                                        | 23.46     | 17.57     | 15.82    | 8.65     |
| SCC25       | +               | -            | 1.00                                        | 1.00      | 1.00      | 1.00     | 0.00     |
|             | -               | +            | 1.08                                        | 2.08      | 2.11      | 1.76     | 0.59     |
| Cell line   | control plasmid | Cx43 plasmid | Densitometry intensity of Bcl-2             |           |           |          |          |
|             |                 |              | Sample1                                     | Sample2   | Sample3   | Mean     | SD       |
| Detroit 562 | +               | -            | 26180.673                                   | 63103.208 | 27522.995 | 38935.63 | 20940.50 |
|             | -               | +            | 17938.681                                   | 58450.673 | 34458.288 | 36949.21 | 20370.54 |
| FaDu        | +               | -            | 34953.765                                   | 12093.518 | 17825.752 | 21624.35 | 11894.10 |
|             | -               | +            | 18042.602                                   | 7312.075  | 12910.288 | 12754.99 | 5366.95  |
| SCC25       | +               | -            | 11264.903                                   | 36610.459 | 7610.953  | 18495.44 | 15794.09 |
|             | -               | +            | 11998.568                                   | 22999.581 | 11714.731 | 15570.96 | 6434.94  |
| Cell line   | control plasmid | Cx43 plasmid | Densitometry intensity ratio of Bcl-2       |           |           |          |          |
|             |                 |              | Sample1                                     | Sample2   | Sample3   | Mean     | SD       |
| Detroit 562 | +               | -            | 1.00                                        | 1.00      | 1.00      | 1.00     | 0.00     |
|             | -               | +            | 0.69                                        | 0.93      | 1.25      | 0.95     | 0.28     |
| FaDu        | +               | -            | 1.00                                        | 1.00      | 1.00      | 1.00     | 0.00     |
|             | -               | +            | 0.52                                        | 0.60      | 0.72      | 0.62     | 0.10     |
| SCC25       | +               | -            | 1.00                                        | 1.00      | 1.00      | 1.00     | 0.00     |
|             | -               | +            | 1.07                                        | 0.63      | 1.54      | 1.08     | 0.46     |
| Cell line   | control plasmid | Cx43 plasmid | Densitometry intensity of $\alpha$ -tubulin |           |           |          |          |
|             |                 |              | Sample1                                     | Sample2   | Sample3   | Mean     | SD       |
| Detroit 562 | +               | -            | 42183.43                                    | 45450.995 | 25165.51  | 37599.98 | 10891.80 |
|             | -               | +            | 42463.38                                    | 52334.602 | 32299.137 | 42365.71 | 10018.09 |
| FaDu        | +               | -            | 55866.522                                   | 39057.673 | 32829.359 | 42584.52 | 11916.66 |

|       |   |   |           |           |           |          |          |
|-------|---|---|-----------|-----------|-----------|----------|----------|
|       | - | + | 52392.551 | 39973.492 | 43844.108 | 45403.38 | 6354.66  |
| SCC25 | + | - | 72646.836 | 40715.401 | 45867.016 | 53076.42 | 17143.10 |
|       | - | + | 76718.22  | 32498.602 | 67022.543 | 58746.46 | 23242.50 |

Table S16. Continuation.

| Cell line   | control plasmid | Cx43 plasmid | Densitometry intensity ratio of $\alpha$ -tubulin                              |         |         |       |      |
|-------------|-----------------|--------------|--------------------------------------------------------------------------------|---------|---------|-------|------|
|             |                 |              | Sample1                                                                        | Sample2 | Sample3 | Mean  | SD   |
| Detroit 562 | +               | -            | 1.00                                                                           | 1.00    | 1.00    | 1.00  | 0.00 |
|             | -               | +            | 1.01                                                                           | 1.15    | 1.28    | 1.15  | 0.14 |
| FaDu        | +               | -            | 1.00                                                                           | 1.00    | 1.00    | 1.00  | 0.00 |
|             | -               | +            | 0.94                                                                           | 1.02    | 1.34    | 1.10  | 0.21 |
| SCC25       | +               | -            | 1.00                                                                           | 1.00    | 1.00    | 1.00  | 0.00 |
|             | -               | +            | 1.06                                                                           | 0.80    | 1.46    | 1.11  | 0.33 |
| Cell line   | control plasmid | Cx43 plasmid | Densitometry intensity ratio of Cx43 after normalization to $\alpha$ -tubulin  |         |         |       |      |
|             |                 |              | Sample1                                                                        | Sample2 | Sample3 | Mean  | SD   |
| Detroit 562 | +               | -            | 1.00                                                                           | 1.00    | 1.00    | 1.00  | 0.00 |
|             | -               | +            | 1.21                                                                           | 1.99    | 2.46    | 1.89  | 0.63 |
| FaDu        | +               | -            | 1.00                                                                           | 1.00    | 1.00    | 1.00  | 0.00 |
|             | -               | +            | 6.85                                                                           | 22.92   | 13.16   | 14.31 | 8.10 |
| SCC25       | +               | -            | 1.00                                                                           | 1.00    | 1.00    | 1.00  | 0.00 |
|             | -               | +            | 1.02                                                                           | 2.60    | 1.45    | 1.69  | 0.82 |
| Cell line   | control plasmid | Cx43 plasmid | Densitometry intensity ratio of Bcl-2 after normalization to $\alpha$ -tubulin |         |         |       |      |
|             |                 |              | Sample1                                                                        | Sample2 | Sample3 | Mean  | SD   |
| Detroit 562 | +               | -            | 1.00                                                                           | 1.00    | 1.00    | 1.00  | 0.00 |
|             | -               | +            | 0.68                                                                           | 0.80    | 0.98    | 0.82  | 0.15 |
| FaDu        | +               | -            | 1.00                                                                           | 1.00    | 1.00    | 1.00  | 0.00 |
|             | -               | +            | 0.55                                                                           | 0.59    | 0.54    | 0.56  | 0.03 |
| SCC25       | +               | -            | 1.00                                                                           | 1.00    | 1.00    | 1.00  | 0.00 |
|             | -               | +            | 1.01                                                                           | 0.79    | 1.05    | 0.95  | 0.14 |

**Table S17.** Changes in the levels of Cx43 and Bcl-2 after Cx43 plasmid transfection in HNSCC cell lines. Densitometry analysis was performed using three independent experiments. The expression of all proteins were compared to expression of the the control plasmid treated controls, after normalization to  $\alpha$ -tubulin. Red color indicate if  $p < 0.05$ . (Figure 4C).

|  |                                          |
|--|------------------------------------------|
|  | T-test for Independent Samples (plasmid) |
|--|------------------------------------------|

| Group 1 vs. Group 2                                             | Note: Variables were treated as independent samples |              |           |    |          |     |     |                  |                  |                   |             |
|-----------------------------------------------------------------|-----------------------------------------------------|--------------|-----------|----|----------|-----|-----|------------------|------------------|-------------------|-------------|
|                                                                 | Mean Group 1                                        | Mean Group 2 | t-value   | df | p        | N 1 | N 2 | Std.Dev. Group 1 | Std.Dev. Group 2 | F-ratio Variances | p Variances |
| Detroit 562 ctrl plasmid Cx43 vs. Detroit 562 Cx43 plasmid Cx43 | 1                                                   | 1.886667     | -2.432396 | 4  | 0.071795 | 3   | 3   | 0                | 0.631374         | 0                 | 1           |

| Group 1 vs. Group 2                                             | T-test for Independent Samples (plasmid)<br>Note: Variables were treated as independent samples |              |          |    |          |     |     |                  |                  |                   |             |
|-----------------------------------------------------------------|-------------------------------------------------------------------------------------------------|--------------|----------|----|----------|-----|-----|------------------|------------------|-------------------|-------------|
|                                                                 | Mean Group 1                                                                                    | Mean Group 2 | t-value  | df | p        | N 1 | N 2 | Std.Dev. Group 1 | Std.Dev. Group 2 | F-ratio Variances | p Variances |
| Detroit 562 ctrl plasmid Cx43 vs. Detroit 562 Cx43 plasmid Bcl2 | 1                                                                                               | 0.82         | 2.064742 | 4  | 0.107871 | 3   | 3   | 0                | 0.150997         | 0                 | 1           |

| Group 1 vs. Group 2                               | T-test for Independent Samples (plasmid)<br>Note: Variables were treated as independent samples |              |           |    |         |     |     |                  |                  |                   |             |
|---------------------------------------------------|-------------------------------------------------------------------------------------------------|--------------|-----------|----|---------|-----|-----|------------------|------------------|-------------------|-------------|
|                                                   | Mean Group 1                                                                                    | Mean Group 2 | t-value   | df | p       | N 1 | N 2 | Std.Dev. Group 1 | Std.Dev. Group 2 | F-ratio Variances | p Variances |
| FaDu ctrl plasmid Cx43 vs. FaDu Cx43 plasmid Cx43 | 1                                                                                               | 14.31        | -2.847358 | 4  | 0.04652 | 3   | 3   | 0                | 8.09649          | 0                 | 1           |

| Group 1 vs. Group 2                               | T-test for Independent Samples (plasmid)<br>Note: Variables were treated as independent samples |              |          |    |          |     |     |                  |                  |                   |             |
|---------------------------------------------------|-------------------------------------------------------------------------------------------------|--------------|----------|----|----------|-----|-----|------------------|------------------|-------------------|-------------|
|                                                   | Mean Group 1                                                                                    | Mean Group 2 | t-value  | df | p        | N 1 | N 2 | Std.Dev. Group 1 | Std.Dev. Group 2 | F-ratio Variances | p Variances |
| FaDu ctrl plasmid Cx43 vs. FaDu Cx43 plasmid Bcl2 | 1                                                                                               | 0.56         | 28.80476 | 4  | 0.000009 | 3   | 3   | 0                | 0.02645751       | 0                 | 1           |

| Group 1 vs. Group 2                                 | T-test for Independent Samples (plasmid)<br>Note: Variables were treated as independent samples |              |          |    |          |     |     |                  |                  |                   |              |
|-----------------------------------------------------|-------------------------------------------------------------------------------------------------|--------------|----------|----|----------|-----|-----|------------------|------------------|-------------------|--------------|
|                                                     | Mean Group 1                                                                                    | Mean Group 2 | t-value  | df | p        | N 1 | N 2 | Std.Dev. Group 1 | Std.Dev. Group 2 | F-ratio Variances | p Variance s |
| SCC25 ctrl plasmid Cx43 vs. SCC25 Cx43 plasmid Cx43 | 1                                                                                               | 1.69         | -1.46302 | 4  | 0.217293 | 3   | 3   | 0                | 0.81688433       | 0                 | 1            |

| Group 1 vs. Group 2                                 | T-test for Independent Samples (plasmid)<br>Note: Variables were treated as independent samples |              |         |    |          |     |     |                  |                  |                   |             |
|-----------------------------------------------------|-------------------------------------------------------------------------------------------------|--------------|---------|----|----------|-----|-----|------------------|------------------|-------------------|-------------|
|                                                     | Mean Group 1                                                                                    | Mean Group 2 | t-value | df | p        | N 1 | N 2 | Std.Dev. Group 1 | Std.Dev. Group 2 | F-ratio Variances | p Variances |
| SCC25 ctrl plasmid Cx43 vs. SCC25 Cx43 plasmid Bcl2 | 1                                                                                               | 0.95         | 0.61859 | 4  | 0.569673 | 3   | 3   | 0                | 0.14             | 0                 | 1           |

**Table S18.** Changes in the effect of paclitaxel on cell viability after knocking down Cx43. HNSCC cell lines were analyzed by trypan blue exclusion test after 48 h of treatment with paclitaxel at different concentrations. Statistical analysis was performed by Student's t-test, the IC<sub>50</sub> values of the cell lines were compared to each other. Red color indicate if p < 0.05. (Figure S3, Table S1).

| Group 1 vs. Group 2                          | T-test for Independent Samples (Paclitaxel+siRNS_IC50) Note: Variables were treated as independent samples |              |          |    |          |     |     |                  |                  |                   |             |
|----------------------------------------------|------------------------------------------------------------------------------------------------------------|--------------|----------|----|----------|-----|-----|------------------|------------------|-------------------|-------------|
|                                              | Mean Group 1                                                                                               | Mean Group 2 | t-value  | df | P        | N 1 | N 2 | Std.Dev. Group 1 | Std.Dev. Group 2 | F-ratio Variances | p Variances |
| Detroit 562 siControl vs. Detroit 562 siCx43 | 48.99333                                                                                                   | 42.76200     | 0.27665  | 4  | 0.795754 | 3   | 3   | 17.39978         | 34.91770         | 4.027206          | 0.397835    |
| Detroit 562 siControl vs. FaDu siControl     | 48.99333                                                                                                   | 40.53333     | 0.44562  | 4  | 0.678924 | 3   | 3   | 17.39978         | 27.90144         | 2.571377          | 0.560008    |
| Detroit 562 siControl vs. FaDu siCx43        | 48.99333                                                                                                   | 50.42333     | -0.07347 | 4  | 0.944957 | 3   | 3   | 17.39978         | 28.87289         | 2.753551          | 0.532829    |
| Detroit 562 siControl vs. SCC25 siControl    | 48.99333                                                                                                   | 11.97400     | 2.97495  | 4  | 0.040943 | 3   | 3   | 17.39978         | 12.71944         | 1.871333          | 0.696540    |
| Detroit 562 siControl vs. SCC25 siCx43       | 48.99333                                                                                                   | 21.67967     | 1.98074  | 4  | 0.118702 | 3   | 3   | 17.39978         | 16.36191         | 1.130888          | 0.938576    |
| Detroit 562 siCx43 vs. FaDu siControl        | 42.76200                                                                                                   | 40.53333     | 0.08636  | 4  | 0.935327 | 3   | 3   | 34.91770         | 27.90144         | 1.566167          | 0.779372    |
| Detroit 562 siCx43 vs. FaDu siCx43           | 42.76200                                                                                                   | 50.42333     | -0.29287 | 4  | 0.784183 | 3   | 3   | 34.91770         | 28.87289         | 1.462550          | 0.812166    |
| Detroit 562 siCx43 vs. SCC25 siControl       | 42.76200                                                                                                   | 11.97400     | 1.43496  | 4  | 0.224621 | 3   | 3   | 34.91770         | 12.71944         | 7.536245          | 0.234295    |
| Detroit 562 siCx43 vs. SCC25 siCx43          | 42.76200                                                                                                   | 21.67967     | 0.94696  | 4  | 0.397282 | 3   | 3   | 34.91770         | 16.36191         | 4.554318          | 0.360080    |
| FaDu siControl vs. FaDu siCx43               | 40.53333                                                                                                   | 50.42333     | -0.42663 | 4  | 0.691605 | 3   | 3   | 27.90144         | 28.87289         | 1.070847          | 0.965789    |
| FaDu siControl vs. SCC25 siControl           | 40.53333                                                                                                   | 11.97400     | 1.61317  | 4  | 0.182003 | 3   | 3   | 27.90144         | 12.71944         | 4.811904          | 0.344121    |
| FaDu siControl vs. SCC25 siCx43              | 40.53333                                                                                                   | 21.67967     | 1.00960  | 4  | 0.369800 | 3   | 3   | 27.90144         | 16.36191         | 2.907939          | 0.511779    |
| FaDu siCx43 vs. SCC25 siControl              | 50.42333                                                                                                   | 11.97400     | 2.11079  | 4  | 0.102399 | 3   | 3   | 28.87289         | 12.71944         | 5.152812          | 0.325055    |
| FaDu siCx43 vs. SCC25 siCx43                 | 50.42333                                                                                                   | 21.67967     | 1.50016  | 4  | 0.207959 | 3   | 3   | 28.87289         | 16.36191         | 3.113957          | 0.486150    |
| SCC25 siControl vs. SCC25 siCx43             | 11.97400                                                                                                   | 21.67967     | -0.81116 | 4  | 0.462780 | 3   | 3   | 12.71944         | 16.36191         | 1.654747          | 0.753367    |

**Table S19.** Changes in the paclitaxel-induced apoptosis of SCC25 after knocking down Cx43. Annexin V-FLUOS/PI (Ann/PI)-stained HNSCC cells were analyzed by FACS after 48 h of treatment with paclitaxel at different concentrations. Live cells are presented by the Ann-/PI- fraction (LL), apoptotic cells by the Ann+/PI- fraction (LR), secondary necrotic cells by the Ann+/PI+ fraction (UR) and primary necrotic cells are detected in the Ann-/PI+ fraction (UL). (Figure 5).

| Concentration (nM) | Paclitaxel-induced apoptosis of non-targeting siRNA treated SCC25 cell (%) |          |          |       |      |          |
|--------------------|----------------------------------------------------------------------------|----------|----------|-------|------|----------|
|                    | Sample 1                                                                   | Sample 2 | Sample 3 | Mean  | SD   |          |
| Control            | UL                                                                         | 0.36     | 0.93     | 1.61  | 1.0  | 0.625806 |
|                    | UR                                                                         | 5.71     | 8.58     | 11.66 | 8.7  | 2.975618 |
|                    | LL                                                                         | 86.94    | 83.85    | 82.28 | 84.4 | 2.370956 |
|                    | LR                                                                         | 6.98     | 6.64     | 4.45  | 6.0  | 1.373111 |

|     |    |       |       |       |      |          |
|-----|----|-------|-------|-------|------|----------|
| 1   | UL | 0.92  | 0.61  |       | 0.8  | 0.219203 |
|     | UR | 5.01  | 7.24  |       | 6.1  | 1.576848 |
|     | LL | 85.73 | 85.3  |       | 85.5 | 0.304056 |
|     | LR | 8.34  | 6.85  |       | 7.6  | 1.053589 |
| 3   | UL | 1.04  | 0.6   | 1.62  | 1.1  | 0.511599 |
|     | UR | 7.98  | 11.02 | 17.94 | 12.3 | 5.104403 |
|     | LL | 79.28 | 76.97 | 76.24 | 77.5 | 1.586957 |
|     | LR | 11.7  | 11.41 | 4.2   | 9.1  | 4.248886 |
| 10  | UL | 1.1   | 0.93  | 1.52  | 1.2  | 0.303699 |
|     | UR | 11.78 | 16.07 | 11.74 | 13.2 | 2.48846  |
|     | LL | 64.83 | 54.99 | 78.3  | 66.0 | 11.70201 |
|     | LR | 22.29 | 28.01 | 8.44  | 19.6 | 10.06252 |
| 33  | UL | 0.69  | 0.67  | 1.96  | 1.1  | 0.739076 |
|     | UR | 21.22 | 19.85 | 27.64 | 22.9 | 4.158874 |
|     | LL | 22.03 | 27.21 | 30.69 | 26.6 | 4.357721 |
|     | LR | 56.07 | 52.27 | 39.71 | 49.4 | 8.561962 |
| 100 | UL | 0.77  | 0.47  | 1.69  | 1.0  | 0.635715 |
|     | UR | 22.12 | 19.68 | 24.54 | 22.1 | 2.430007 |
|     | LL | 20.42 | 23.1  | 27.76 | 23.8 | 3.714243 |
|     | LR | 56.69 | 56.75 | 46.01 | 53.2 | 6.183494 |

| Concentration<br>(nM) | Paclitaxel-induced apoptosis of <i>GJA1</i> siRNA treated SCC25 cell (%) |          |          |       |       |          |
|-----------------------|--------------------------------------------------------------------------|----------|----------|-------|-------|----------|
|                       | Sample 1                                                                 | Sample 2 | Sample 3 | Mean  | SD    |          |
| Control               | UL                                                                       | 1.02     | 0.64     | 1.54  | 1.07  | 0.451811 |
|                       | UR                                                                       | 4.52     | 5.48     | 6.79  | 5.60  | 1.139488 |
|                       | LL                                                                       | 89.22    | 90.3     | 88.71 | 89.41 | 0.81185  |
|                       | LR                                                                       | 5.24     | 3.58     | 2.96  | 3.93  | 1.17887  |
| 1                     | UL                                                                       | 0.98     | 0.82     | 2.03  | 1.28  | 0.657292 |
|                       | UR                                                                       | 4.6      | 9.28     | 6.31  | 6.73  | 2.368101 |
|                       | LL                                                                       | 88.72    | 85.81    | 89.31 | 87.95 | 1.873775 |
|                       | LR                                                                       | 5.7      | 4.09     | 2.35  | 4.05  | 1.67542  |
| 3                     | UL                                                                       | 0.97     | 1.06     | 1.79  | 1.27  | 0.449704 |
|                       | UR                                                                       | 5.7      | 8.87     | 7.1   | 7.22  | 1.588595 |
|                       | LL                                                                       | 85.82    | 84.15    | 88.16 | 86.04 | 2.014307 |
|                       | LR                                                                       | 7.5      | 5.92     | 2.95  | 5.46  | 2.310115 |



**Table S19.** continuation

|     |    |       |       |       |       |          |
|-----|----|-------|-------|-------|-------|----------|
|     | UL | 1.23  | 1.18  | 1.52  | 1.31  | 0.183576 |
| 10  | UR | 8.69  | 12.73 | 10.17 | 10.53 | 2.043918 |
|     | LL | 77.44 | 74.62 | 83.85 | 78.64 | 4.72993  |
|     | LR | 12.64 | 11.47 | 4.46  | 9.52  | 4.423826 |
|     | UL | 1.27  | 0.75  | 4.28  | 2.10  | 1.905754 |
| 33  | UR | 21.63 | 22.2  | 16.57 | 20.13 | 3.09907  |
|     | LL | 40.95 | 44.97 | 67.14 | 51.02 | 14.10429 |
|     | LR | 36.15 | 32.08 | 12.01 | 26.75 | 12.92355 |
| 100 | UL | 1.01  | 0.57  | 2.8   | 1.46  | 1.181144 |
|     | UR | 21.87 | 23.97 | 23.14 | 22.99 | 1.057655 |
|     | LL | 38.25 | 41.38 | 49.19 | 42.94 | 5.634368 |
|     | LR | 38.87 | 34.08 | 24.87 | 32.61 | 7.115338 |

**Table S20.** Changes in the paclitaxel-induced apoptosis of SCC25 after knocking down Cx43. Annexin V-FLUOS/PI (Ann/PI)-stained HNSCC cells were analyzed by FACS after 48 h of treatment with paclitaxel at different concentrations. Live cells are presented by the Ann-/PI- fraction (LL), apoptotic cells by the Ann+/PI- fraction (LR), secondary necrotic cells by the Ann+/PI+ fraction (UR) and primary necrotic cells are detected in the Ann-/PI+ fraction (UL). Statistical analysis was performed by Student's t-test, the cell fractions in all concentration were compared to negative control fractions in non-targeting siRNA or *GJA1* siRNA treated samples. The cell fractions in *GJA1* siRNA treated samples were also compared to cell fractions in non-targeting siRNA treated samples. Red color indicate if  $p < 0.05$ . (Figure 5).

| Group 1 vs. Group 2      | T-test for Independent Samples (Paclitaxel_FACS_SCC25_non-targeting siRNA) Note: Variables were treated as independent samples |              |          |    |          |                 |                 |                  |                  |                   |             |
|--------------------------|--------------------------------------------------------------------------------------------------------------------------------|--------------|----------|----|----------|-----------------|-----------------|------------------|------------------|-------------------|-------------|
|                          | Mean Group 1                                                                                                                   | Mean Group 2 | t-value  | df | p        | Valid N Group 1 | Valid N Group 2 | Std.Dev. Group 1 | Std.Dev. Group 2 | F-ratio Variances | p Variances |
| Control UL vs. 1 nM UL   | 0.966667                                                                                                                       | 0.765000     | 0.41966  | 3  | 0.702972 | 3               | 2               | 0.625806         | 0.219203         | 8.15054           | 0.480832    |
| Control UL vs. 3 nM UL   | 0.966667                                                                                                                       | 1.086667     | -0.25714 | 4  | 0.809759 | 3               | 3               | 0.625806         | 0.511599         | 1.49631           | 0.801184    |
| Control UL vs. 10 nM UL  | 0.966667                                                                                                                       | 1.183333     | -0.53950 | 4  | 0.618173 | 3               | 3               | 0.625806         | 0.303699         | 4.24611           | 0.381234    |
| Control UL vs. 33 nM UL  | 0.966667                                                                                                                       | 1.106667     | -0.25039 | 4  | 0.814620 | 3               | 3               | 0.625806         | 0.739076         | 1.39476           | 0.835158    |
| Control UL vs. 100 nM UL | 0.966667                                                                                                                       | 0.976667     | -0.01942 | 4  | 0.985439 | 3               | 3               | 0.625806         | 0.635715         | 1.03192           | 0.984292    |
| 1 nM UL vs. 3 nM UL      | 0.765000                                                                                                                       | 1.086667     | -0.80731 | 3  | 0.478558 | 2               | 3               | 0.219203         | 0.511599         | 5.44710           | 0.579912    |
| 1 nM UL vs. 10 nM UL     | 0.765000                                                                                                                       | 1.183333     | -1.64606 | 3  | 0.198303 | 2               | 3               | 0.219203         | 0.303699         | 1.91953           | 0.909180    |
| 1 nM UL vs. 33 nM UL     | 0.765000                                                                                                                       | 1.106667     | -0.60702 | 3  | 0.586698 | 2               | 3               | 0.219203         | 0.739076         | 11.36802          | 0.410512    |
| 1 nM UL vs. 100 nM UL    | 0.765000                                                                                                                       | 0.976667     | -0.43400 | 3  | 0.693608 | 2               | 3               | 0.219203         | 0.635715         | 8.41068           | 0.473761    |
| 3 nM UL vs. 10 nM UL     | 1.086667                                                                                                                       | 1.183333     | -0.28142 | 4  | 0.792346 | 3               | 3               | 0.511599         | 0.303699         | 2.83773           | 0.521141    |

|                        |          |          |          |   |          |   |   |          |          |         |          |
|------------------------|----------|----------|----------|---|----------|---|---|----------|----------|---------|----------|
| 3 nM UL vs. 33 nM UL   | 1.086667 | 1.106667 | -0.03854 | 4 | 0.971105 | 3 | 3 | 0.511599 | 0.739076 | 2.08698 | 0.647882 |
| 3 nM UL vs. 100 nM UL  | 1.086667 | 0.976667 | 0.23349  | 4 | 0.826847 | 3 | 3 | 0.511599 | 0.635715 | 1.54407 | 0.786143 |
| 10 nM UL vs. 33 nM UL  | 1.183333 | 1.106667 | 0.16619  | 4 | 0.876071 | 3 | 3 | 0.303699 | 0.739076 | 5.92230 | 0.288921 |
| 10 nM UL vs. 100 nM UL | 1.183333 | 0.976667 | 0.50808  | 4 | 0.638136 | 3 | 3 | 0.303699 | 0.635715 | 4.38164 | 0.371634 |
| 33 nM UL vs. 100 nM UL | 1.106667 | 0.976667 | 0.23097  | 4 | 0.828670 | 3 | 3 | 0.739076 | 0.635715 | 1.35162 | 0.850479 |

Table S20. continuation

| Group 1 vs. Group 2      | T-test for Independent Samples (Paclitaxel_FACS_SCC25_non-targeting siRNA) Note: Variables were treated as independent samples |              |          |    |          |                 |                 |                  |                  |                   |             |
|--------------------------|--------------------------------------------------------------------------------------------------------------------------------|--------------|----------|----|----------|-----------------|-----------------|------------------|------------------|-------------------|-------------|
|                          | Mean Group 1                                                                                                                   | Mean Group 2 | t-value  | df | p        | Valid N Group 1 | Valid N Group 2 | Std.Dev. Group 1 | Std.Dev. Group 2 | F-ratio Variances | p Variances |
| Control UR vs. 1 nM UR   | 8.65000                                                                                                                        | 6.12500      | 1.06608  | 3  | 0.364570 | 3               | 2               | 2.975618         | 1.576848         | 3.56102           | 0.701774    |
| Control UR vs. 3 nM UR   | 8.65000                                                                                                                        | 12.31333     | -1.07391 | 4  | 0.343331 | 3               | 3               | 2.975618         | 5.104403         | 2.94263           | 0.507276    |
| Control UR vs. 10 nM UR  | 8.65000                                                                                                                        | 13.19667     | -2.03017 | 4  | 0.112191 | 3               | 3               | 2.975618         | 2.488460         | 1.42986           | 0.823093    |
| Control UR vs. 33 nM UR  | 8.65000                                                                                                                        | 22.90333     | -4.82766 | 4  | 0.008476 | 3               | 3               | 2.975618         | 4.158874         | 1.95343           | 0.677179    |
| Control UR vs. 100 nM UR | 8.65000                                                                                                                        | 22.11333     | -6.06990 | 4  | 0.003721 | 3               | 3               | 2.975618         | 2.430007         | 1.49948           | 0.800168    |
| 1 nM UR vs. 3 nM UR      | 6.12500                                                                                                                        | 12.31333     | -1.58907 | 3  | 0.210259 | 2               | 3               | 1.576848         | 5.104403         | 10.47877          | 0.426814    |
| 1 nM UR vs. 10 nM UR     | 6.12500                                                                                                                        | 13.19667     | -3.47935 | 3  | 0.040074 | 2               | 3               | 1.576848         | 2.488460         | 2.49047           | 0.817796    |
| 1 nM UR vs. 33 nM UR     | 6.12500                                                                                                                        | 22.90333     | -5.22801 | 3  | 0.013615 | 2               | 3               | 1.576848         | 4.158874         | 6.95620           | 0.517912    |
| 1 nM UR vs. 100 nM UR    | 6.12500                                                                                                                        | 22.11333     | -8.02310 | 3  | 0.004043 | 2               | 3               | 1.576848         | 2.430007         | 2.37484           | 0.834080    |
| 3 nM UR vs. 10 nM UR     | 12.31333                                                                                                                       | 13.19667     | -0.26943 | 4  | 0.800930 | 3               | 3               | 5.104403         | 2.488460         | 4.20754           | 0.384058    |
| 3 nM UR vs. 33 nM UR     | 12.31333                                                                                                                       | 22.90333     | -2.78584 | 4  | 0.049522 | 3               | 3               | 5.104403         | 4.158874         | 1.50639           | 0.797959    |
| 3 nM UR vs. 100 nM UR    | 12.31333                                                                                                                       | 22.11333     | -3.00251 | 4  | 0.039843 | 3               | 3               | 5.104403         | 2.430007         | 4.41240           | 0.369522    |
| 10 nM UR vs. 33 nM UR    | 13.19667                                                                                                                       | 22.90333     | -3.46898 | 4  | 0.025607 | 3               | 3               | 2.488460         | 4.158874         | 2.79312           | 0.527270    |
| 10 nM UR vs. 100 nM UR   | 13.19667                                                                                                                       | 22.11333     | -4.44036 | 4  | 0.011331 | 3               | 3               | 2.488460         | 2.430007         | 1.04869           | 0.976234    |
| 33 nM UR vs. 100 nM UR   | 22.90333                                                                                                                       | 22.11333     | 0.28407  | 4  | 0.790452 | 3               | 3               | 4.158874         | 2.430007         | 2.92912           | 0.509020    |

Table S20. continuation

| Group 1 vs. Group 2    | T-test for Independent Samples (Paclitaxel_FACS_SCC25_non-targeting siRNA) Note: Variables were treated as independent samples |              |         |    |          |                 |                 |                  |                  |                   |             |
|------------------------|--------------------------------------------------------------------------------------------------------------------------------|--------------|---------|----|----------|-----------------|-----------------|------------------|------------------|-------------------|-------------|
|                        | Mean Group 1                                                                                                                   | Mean Group 2 | t-value | df | p        | Valid N Group 1 | Valid N Group 2 | Std.Dev. Group 1 | Std.Dev. Group 2 | F-ratio Variances | p Variances |
| Control LL vs. 1 nM LL | 84.35667                                                                                                                       | 85.51500     | -0.6528 | 3  | 0.560459 | 3               | 2               | 2.37096          | 0.30406          | 60.805            | 0.180620    |

|                          |          |          |         |   |          |   |   |          |          |          |          |
|--------------------------|----------|----------|---------|---|----------|---|---|----------|----------|----------|----------|
| Control LL vs. 3 nM LL   | 84.35667 | 77.49667 | 4.1646  | 4 | 0.014092 | 3 | 3 | 2.37096  | 1.58696  | 2.232    | 0.618790 |
| Control LL vs. 10 nM LL  | 84.35667 | 66.04000 | 2.6571  | 4 | 0.056560 | 3 | 3 | 2.37096  | 11.70201 | 24.360   | 0.078865 |
| Control LL vs. 33 nM LL  | 84.35667 | 26.64333 | 20.1498 | 4 | 0.000036 | 3 | 3 | 2.37096  | 4.35772  | 3.378    | 0.456820 |
| Control LL vs. 100 nM LL | 84.35667 | 23.76000 | 23.8187 | 4 | 0.000018 | 3 | 3 | 2.37096  | 3.71424  | 2.454    | 0.579021 |
| 1 nM LL vs. 3 nM LL      | 85.51500 | 77.49667 | 6.7175  | 3 | 0.006734 | 2 | 3 | 0.30406  | 1.58696  | 27.241   | 0.268506 |
| 1 nM LL vs. 10 nM LL     | 85.51500 | 66.04000 | 2.2324  | 3 | 0.111743 | 2 | 3 | 0.30406  | 11.70201 | 1481.202 | 0.036740 |
| 1 nM LL vs. 33 nM LL     | 85.51500 | 26.64333 | 18.1032 | 3 | 0.000368 | 2 | 3 | 0.30406  | 4.35772  | 205.405  | 0.098556 |
| 1 nM LL vs. 100 nM LL    | 85.51500 | 23.76000 | 22.2696 | 3 | 0.000198 | 2 | 3 | 0.30406  | 3.71424  | 149.222  | 0.115577 |
| 3 nM LL vs. 10 nM LL     | 77.49667 | 66.04000 | 1.6804  | 4 | 0.168185 | 3 | 3 | 1.58696  | 11.70201 | 54.374   | 0.036118 |
| 3 nM LL vs. 33 nM LL     | 77.49667 | 26.64333 | 18.9923 | 4 | 0.000045 | 3 | 3 | 1.58696  | 4.35772  | 7.540    | 0.234184 |
| 3 nM LL vs. 100 nM LL    | 77.49667 | 23.76000 | 23.0436 | 4 | 0.000021 | 3 | 3 | 1.58696  | 3.71424  | 5.478    | 0.308744 |
| 10 nM LL vs. 33 nM LL    | 66.04000 | 26.64333 | 5.4646  | 4 | 0.005454 | 3 | 3 | 11.70201 | 4.35772  | 7.211    | 0.243572 |
| 10 nM LL vs. 100 nM LL   | 66.04000 | 23.76000 | 5.9647  | 4 | 0.003967 | 3 | 3 | 11.70201 | 3.71424  | 9.926    | 0.183047 |
| 33 nM LL vs. 100 nM LL   | 26.64333 | 23.76000 | 0.8722  | 4 | 0.432326 | 3 | 3 | 4.35772  | 3.71424  | 1.377    | 0.841571 |

Table S20. continuation

| Group 1 vs. Group 2      | T-test for Independent Samples (Paclitaxel_FACS_SCC25_non-targeting siRNA) Note: Variables were treated as independent samples |              |          |    |          |                 |                 |                  |                  |                   |             |
|--------------------------|--------------------------------------------------------------------------------------------------------------------------------|--------------|----------|----|----------|-----------------|-----------------|------------------|------------------|-------------------|-------------|
|                          | Mean Group 1                                                                                                                   | Mean Group 2 | t-value  | df | p        | Valid N Group 1 | Valid N Group 2 | Std.Dev. Group 1 | Std.Dev. Group 2 | F-ratio Variances | p Variances |
| Control LR vs. 1 nM LR   | 6.02333                                                                                                                        | 7.59500      | -1.3498  | 3  | 0.269904 | 3               | 2               | 1.37311          | 1.05359          | 1.69851           | 0.953785    |
| Control LR vs. 3 nM LR   | 6.02333                                                                                                                        | 9.10333      | -1.1947  | 4  | 0.298193 | 3               | 3               | 1.37311          | 4.24889          | 9.57500           | 0.189125    |
| Control LR vs. 10 nM LR  | 6.02333                                                                                                                        | 19.58000     | -2.3121  | 4  | 0.081846 | 3               | 3               | 1.37311          | 10.06252         | 53.70346          | 0.036561    |
| Control LR vs. 33 nM LR  | 6.02333                                                                                                                        | 49.35000     | -8.6542  | 4  | 0.000981 | 3               | 3               | 1.37311          | 8.56196          | 38.88082          | 0.050149    |
| Control LR vs. 100 nM LR | 6.02333                                                                                                                        | 53.15000     | -12.8867 | 4  | 0.000209 | 3               | 3               | 1.37311          | 6.18349          | 20.27948          | 0.093987    |
| 1 nM LR vs. 3 nM LR      | 7.59500                                                                                                                        | 9.10333      | -0.4691  | 3  | 0.670972 | 2               | 3               | 1.05359          | 4.24889          | 16.26326          | 0.345411    |
| 1 nM LR vs. 10 nM LR     | 7.59500                                                                                                                        | 19.58000     | -1.5936  | 3  | 0.209279 | 2               | 3               | 1.05359          | 10.06252         | 91.21598          | 0.147670    |
| 1 nM LR vs. 33 nM LR     | 7.59500                                                                                                                        | 49.35000     | -6.5183  | 3  | 0.007336 | 2               | 3               | 1.05359          | 8.56196          | 66.03955          | 0.173370    |
| 1 nM LR vs. 100 nM LR    | 7.59500                                                                                                                        | 53.15000     | -9.8132  | 3  | 0.002249 | 2               | 3               | 1.05359          | 6.18349          | 34.44493          | 0.239234    |
| 3 nM LR vs. 10 nM LR     | 9.10333                                                                                                                        | 19.58000     | -1.6613  | 4  | 0.171988 | 3               | 3               | 4.24889          | 10.06252         | 5.60871           | 0.302631    |

|                        |          |          |          |   |          |   |   |          |         |         |          |
|------------------------|----------|----------|----------|---|----------|---|---|----------|---------|---------|----------|
| 3 nM LR vs. 33 nM LR   | 9.10333  | 49.35000 | -7.2931  | 4 | 0.001879 | 3 | 3 | 4.24889  | 8.56196 | 4.06066 | 0.395205 |
| 3 nM LR vs. 100 nM LR  | 9.10333  | 53.15000 | -10.1687 | 4 | 0.000527 | 3 | 3 | 4.24889  | 6.18349 | 2.11796 | 0.641445 |
| 10 nM LR vs. 33 nM LR  | 19.58000 | 49.35000 | -3.9027  | 4 | 0.017501 | 3 | 3 | 10.06252 | 8.56196 | 1.38123 | 0.839901 |
| 10 nM LR vs. 100 nM LR | 19.58000 | 53.15000 | -4.9231  | 4 | 0.007912 | 3 | 3 | 10.06252 | 6.18349 | 2.64817 | 0.548220 |
| 33 nM LR vs. 100 nM LR | 49.35000 | 53.15000 | -0.6232  | 4 | 0.566930 | 3 | 3 | 8.56196  | 6.18349 | 1.91725 | 0.685577 |

Table S20. continuation

| Group 1 vs. Group 2      | T-test for Independent Samples (Paclitaxel_FACS_SCC25_GJA1 siRNA) Note: Variables were treated as independent samples |              |           |    |          |                 |                 |                  |                  |                   |             |
|--------------------------|-----------------------------------------------------------------------------------------------------------------------|--------------|-----------|----|----------|-----------------|-----------------|------------------|------------------|-------------------|-------------|
|                          | Mean Group 1                                                                                                          | Mean Group 2 | t-value   | df | p        | Valid N Group 1 | Valid N Group 2 | Std.Dev. Group 1 | Std.Dev. Group 2 | F-ratio Variances | p Variances |
| Control UL vs. 1 nM UL   | 1.066667                                                                                                              | 1.276667     | -0.456031 | 4  | 0.672029 | 3               | 3               | 0.451811         | 0.657292         | 2.1164            | 0.641761    |
| Control UL vs. 3 nM UL   | 1.066667                                                                                                              | 1.273333     | -0.561529 | 4  | 0.604407 | 3               | 3               | 0.451811         | 0.449704         | 1.0094            | 0.995324    |
| Control UL vs. 10 nM UL  | 1.066667                                                                                                              | 1.310000     | -0.864223 | 4  | 0.436211 | 3               | 3               | 0.451811         | 0.183576         | 6.0574            | 0.283392    |
| Control UL vs. 33 nM UL  | 1.066667                                                                                                              | 2.100000     | -0.913818 | 4  | 0.412512 | 3               | 3               | 0.451811         | 1.905754         | 17.7918           | 0.106429    |
| Control UL vs. 100 nM UL | 1.066667                                                                                                              | 1.460000     | -0.538723 | 4  | 0.618661 | 3               | 3               | 0.451811         | 1.181144         | 6.8343            | 0.255289    |
| 1 nM UL vs. 3 nM UL      | 1.276667                                                                                                              | 1.273333     | 0.007249  | 4  | 0.994563 | 3               | 3               | 0.657292         | 0.449704         | 2.1363            | 0.637692    |
| 1 nM UL vs. 10 nM UL     | 1.276667                                                                                                              | 1.310000     | -0.084600 | 4  | 0.936644 | 3               | 3               | 0.657292         | 0.183576         | 12.8200           | 0.144718    |
| 1 nM UL vs. 33 nM UL     | 1.276667                                                                                                              | 2.100000     | -0.707397 | 4  | 0.518357 | 3               | 3               | 0.657292         | 1.905754         | 8.4065            | 0.212618    |
| 1 nM UL vs. 100 nM UL    | 1.276667                                                                                                              | 1.460000     | -0.234918 | 4  | 0.825808 | 3               | 3               | 0.657292         | 1.181144         | 3.2291            | 0.472908    |
| 3 nM UL vs. 10 nM UL     | 1.273333                                                                                                              | 1.310000     | -0.130749 | 4  | 0.902286 | 3               | 3               | 0.449704         | 0.183576         | 6.0010            | 0.285674    |
| 3 nM UL vs. 33 nM UL     | 1.273333                                                                                                              | 2.100000     | -0.731236 | 4  | 0.505166 | 3               | 3               | 0.449704         | 1.905754         | 17.9590           | 0.105491    |
| 3 nM UL vs. 100 nM UL    | 1.273333                                                                                                              | 1.460000     | -0.255817 | 4  | 0.810709 | 3               | 3               | 0.449704         | 1.181144         | 6.8985            | 0.253214    |
| 10 nM UL vs. 33 nM UL    | 1.310000                                                                                                              | 2.100000     | -0.714686 | 4  | 0.514297 | 3               | 3               | 0.183576         | 1.905754         | 107.7715          | 0.018387    |
| 10 nM UL vs. 100 nM UL   | 1.310000                                                                                                              | 1.460000     | -0.217353 | 4  | 0.838570 | 3               | 3               | 0.183576         | 1.181144         | 41.3976           | 0.047172    |
| 33 nM UL vs. 100 nM UL   | 2.100000                                                                                                              | 1.460000     | 0.494409  | 4  | 0.646940 | 3               | 3               | 1.905754         | 1.181144         | 2.6033            | 0.555043    |

Table S20. continuation

| Group 1 vs. Group 2    | T-test for Independent Samples (Paclitaxel_FACS_SCC25_GJA1 siRNA) Note: Variables were treated as independent samples |              |         |    |          |                 |                 |                  |                  |                   |             |
|------------------------|-----------------------------------------------------------------------------------------------------------------------|--------------|---------|----|----------|-----------------|-----------------|------------------|------------------|-------------------|-------------|
|                        | Mean Group 1                                                                                                          | Mean Group 2 | t-value | df | p        | Valid N Group 1 | Valid N Group 2 | Std.Dev. Group 1 | Std.Dev. Group 2 | F-ratio Variances | p Variances |
| Control UR vs. 1 nM UR | 5.59667                                                                                                               | 6.73000      | -0.7470 | 4  | 0.496605 | 3               | 3               | 1.139488         | 2.368101         | 4.318974          | 0.376012    |

|                          |          |          |          |   |          |   |   |          |          |          |          |
|--------------------------|----------|----------|----------|---|----------|---|---|----------|----------|----------|----------|
| Control UR vs. 3 nM UR   | 5.59667  | 7.22333  | -1.4412  | 4 | 0.222983 | 3 | 3 | 1.139488 | 1.588595 | 1.943599 | 0.679440 |
| Control UR vs. 10 nM UR  | 5.59667  | 10.53000 | -3.6515  | 4 | 0.021743 | 3 | 3 | 1.139488 | 2.043918 | 3.217416 | 0.474224 |
| Control UR vs. 33 nM UR  | 5.59667  | 20.13333 | -7.6253  | 4 | 0.001588 | 3 | 3 | 1.139488 | 3.099070 | 7.396786 | 0.238186 |
| Control UR vs. 100 nM UR | 5.59667  | 22.99333 | -19.3813 | 4 | 0.000042 | 3 | 3 | 1.139488 | 1.057655 | 1.160732 | 0.925612 |
| 1 nM UR vs. 3 nM UR      | 6.73000  | 7.22333  | -0.2997  | 4 | 0.779369 | 3 | 3 | 2.368101 | 1.588595 | 2.222153 | 0.620703 |
| 1 nM UR vs. 10 nM UR     | 6.73000  | 10.53000 | -2.1040  | 4 | 0.103182 | 3 | 3 | 2.368101 | 2.043918 | 1.342374 | 0.853835 |
| 1 nM UR vs. 33 nM UR     | 6.73000  | 20.13333 | -5.9522  | 4 | 0.003998 | 3 | 3 | 2.368101 | 3.099070 | 1.712626 | 0.737293 |
| 1 nM UR vs. 100 nM UR    | 6.73000  | 22.99333 | -10.8611 | 4 | 0.000408 | 3 | 3 | 2.368101 | 1.057655 | 5.013171 | 0.332603 |
| 3 nM UR vs. 10 nM UR     | 7.22333  | 10.53000 | -2.2125  | 4 | 0.091376 | 3 | 3 | 1.588595 | 2.043918 | 1.655391 | 0.753185 |
| 3 nM UR vs. 33 nM UR     | 7.22333  | 20.13333 | -6.4209  | 4 | 0.003024 | 3 | 3 | 1.588595 | 3.099070 | 3.805717 | 0.416171 |
| 3 nM UR vs. 100 nM UR    | 7.22333  | 22.99333 | -14.3122 | 4 | 0.000138 | 3 | 3 | 1.588595 | 1.057655 | 2.255997 | 0.614251 |
| 10 nM UR vs. 33 nM UR    | 10.53000 | 20.13333 | -4.4805  | 4 | 0.010985 | 3 | 3 | 2.043918 | 3.099070 | 2.298983 | 0.606247 |
| 10 nM UR vs. 100 nM UR   | 10.53000 | 22.99333 | -9.3802  | 4 | 0.000720 | 3 | 3 | 2.043918 | 1.057655 | 3.734557 | 0.422426 |
| 33 nM UR vs. 100 nM UR   | 20.13333 | 22.99333 | -1.5128  | 4 | 0.204887 | 3 | 3 | 3.099070 | 1.057655 | 8.585685 | 0.208644 |

Table S20. continuation

| Group 1 vs. Group 2      | T-test for Independent Samples (Paclitaxel_FACS_SCC25_GJA1 siRNA) Note: Variables were treated as independent samples |              |         |    |          |                 |                 |                  |                  |                   |             |
|--------------------------|-----------------------------------------------------------------------------------------------------------------------|--------------|---------|----|----------|-----------------|-----------------|------------------|------------------|-------------------|-------------|
|                          | Mean Group 1                                                                                                          | Mean Group 2 | t-value | df | p        | Valid N Group 1 | Valid N Group 2 | Std.Dev. Group 1 | Std.Dev. Group 2 | F-ratio Variances | p Variances |
| Control LL vs. 1 nM LL   | 89.41000                                                                                                              | 87.94667     | 1.2412  | 4  | 0.282360 | 3               | 3               | 0.81185          | 1.87378          | 5.3270            | 0.316105    |
| Control LL vs. 3 nM LL   | 89.41000                                                                                                              | 86.04333     | 2.6850  | 4  | 0.054941 | 3               | 3               | 0.81185          | 2.01431          | 6.1560            | 0.279485    |
| Control LL vs. 10 nM LL  | 89.41000                                                                                                              | 78.63667     | 3.8882  | 4  | 0.017717 | 3               | 3               | 0.81185          | 4.72993          | 33.9436           | 0.057235    |
| Control LL vs. 33 nM LL  | 89.41000                                                                                                              | 51.02000     | 4.7066  | 4  | 0.009263 | 3               | 3               | 0.81185          | 14.10429         | 301.8220          | 0.006605    |
| Control LL vs. 100 nM LL | 89.41000                                                                                                              | 42.94000     | 14.1392 | 4  | 0.000145 | 3               | 3               | 0.81185          | 5.63437          | 48.1658           | 0.040679    |
| 1 nM LL vs. 3 nM LL      | 87.94667                                                                                                              | 86.04333     | 1.1983  | 4  | 0.296937 | 3               | 3               | 1.87378          | 2.01431          | 1.1556            | 0.927806    |
| 1 nM LL vs. 10 nM LL     | 87.94667                                                                                                              | 78.63667     | 3.1696  | 4  | 0.033872 | 3               | 3               | 1.87378          | 4.72993          | 6.3720            | 0.271298    |
| 1 nM LL vs. 33 nM LL     | 87.94667                                                                                                              | 51.02000     | 4.4952  | 4  | 0.010862 | 3               | 3               | 1.87378          | 14.10429         | 56.6588           | 0.034687    |
| 1 nM LL vs. 100 nM LL    | 87.94667                                                                                                              | 42.94000     | 13.1285 | 4  | 0.000194 | 3               | 3               | 1.87378          | 5.63437          | 9.0418            | 0.199167    |
| 3 nM LL vs. 10 nM LL     | 86.04333                                                                                                              | 78.63667     | 2.4954  | 4  | 0.067097 | 3               | 3               | 2.01431          | 4.72993          | 5.5139            | 0.307036    |

|                        |          |          |         |   |          |   |   |          |          |         |          |
|------------------------|----------|----------|---------|---|----------|---|---|----------|----------|---------|----------|
| 3 nM LL vs. 33 nM LL   | 86.04333 | 51.02000 | 4.2578  | 4 | 0.013077 | 3 | 3 | 2.01431  | 14.10429 | 49.0288 | 0.039977 |
| 3 nM LL vs. 100 nM LL  | 86.04333 | 42.94000 | 12.4770 | 4 | 0.000237 | 3 | 3 | 2.01431  | 5.63437  | 7.8242  | 0.226650 |
| 10 nM LL vs. 33 nM LL  | 78.63667 | 51.02000 | 3.2154  | 4 | 0.032421 | 3 | 3 | 4.72993  | 14.10429 | 8.8919  | 0.202186 |
| 10 nM LL vs. 100 nM LL | 78.63667 | 42.94000 | 8.4046  | 4 | 0.001097 | 3 | 3 | 4.72993  | 5.63437  | 1.4190  | 0.826789 |
| 33 nM LL vs. 100 nM LL | 51.02000 | 42.94000 | 0.9214  | 4 | 0.408964 | 3 | 3 | 14.10429 | 5.63437  | 6.2663  | 0.275243 |

Table S20. continuation

| Group 1 vs. Group 2      | T-test for Independent Samples (Paclitaxel_FACS_SCC25_GJA1 siRNA) Note: Variables were treated as independent samples |              |          |    |          |                 |                 |                  |                  |                   |             |
|--------------------------|-----------------------------------------------------------------------------------------------------------------------|--------------|----------|----|----------|-----------------|-----------------|------------------|------------------|-------------------|-------------|
|                          | Mean Group 1                                                                                                          | Mean Group 2 | t-value  | df | p        | Valid N Group 1 | Valid N Group 2 | Std.Dev. Group 1 | Std.Dev. Group 2 | F-ratio Variances | p Variances |
| Control LR vs. 1 nM LR   | 3.92667                                                                                                               | 4.04667      | -0.10146 | 4  | 0.924070 | 3               | 3               | 1.17887          | 1.67542          | 2.0198            | 0.662288    |
| Control LR vs. 3 nM LR   | 3.92667                                                                                                               | 5.45667      | -1.02179 | 4  | 0.364647 | 3               | 3               | 1.17887          | 2.31012          | 3.8400            | 0.413220    |
| Control LR vs. 10 nM LR  | 3.92667                                                                                                               | 9.52333      | -2.11736 | 4  | 0.101644 | 3               | 3               | 1.17887          | 4.42383          | 14.0820           | 0.132608    |
| Control LR vs. 33 nM LR  | 3.92667                                                                                                               | 26.74667     | -3.04575 | 4  | 0.038186 | 3               | 3               | 1.17887          | 12.92355         | 120.1801          | 0.016504    |
| Control LR vs. 100 nM LR | 3.92667                                                                                                               | 32.60667     | -6.88754 | 4  | 0.002329 | 3               | 3               | 1.17887          | 7.11534          | 36.4300           | 0.053433    |
| 1 nM LR vs. 3 nM LR      | 4.04667                                                                                                               | 5.45667      | -0.85580 | 4  | 0.440347 | 3               | 3               | 1.67542          | 2.31012          | 1.9012            | 0.689378    |
| 1 nM LR vs. 10 nM LR     | 4.04667                                                                                                               | 9.52333      | -2.00527 | 4  | 0.115420 | 3               | 3               | 1.67542          | 4.42383          | 6.9719            | 0.250883    |
| 1 nM LR vs. 33 nM LR     | 4.04667                                                                                                               | 26.74667     | -3.01707 | 4  | 0.039276 | 3               | 3               | 1.67542          | 12.92355         | 59.4999           | 0.033058    |
| 1 nM LR vs. 100 nM LR    | 4.04667                                                                                                               | 32.60667     | -6.76715 | 4  | 0.002488 | 3               | 3               | 1.67542          | 7.11534          | 18.0361           | 0.105063    |
| 3 nM LR vs. 10 nM LR     | 5.45667                                                                                                               | 9.52333      | -1.41137 | 4  | 0.230976 | 3               | 3               | 2.31012          | 4.42383          | 3.6671            | 0.428527    |
| 3 nM LR vs. 33 nM LR     | 5.45667                                                                                                               | 26.74667     | -2.80882 | 4  | 0.048375 | 3               | 3               | 2.31012          | 12.92355         | 31.2966           | 0.061926    |
| 3 nM LR vs. 100 nM LR    | 5.45667                                                                                                               | 32.60667     | -6.28599 | 4  | 0.003271 | 3               | 3               | 2.31012          | 7.11534          | 9.4869            | 0.190714    |
| 10 nM LR vs. 33 nM LR    | 9.52333                                                                                                               | 26.74667     | -2.18391 | 4  | 0.094331 | 3               | 3               | 4.42383          | 12.92355         | 8.5343            | 0.209769    |
| 10 nM LR vs. 100 nM LR   | 9.52333                                                                                                               | 32.60667     | -4.77195 | 4  | 0.008827 | 3               | 3               | 4.42383          | 7.11534          | 2.5870            | 0.557570    |
| 33 nM LR vs. 100 nM LR   | 26.74667                                                                                                              | 32.60667     | -0.68799 | 4  | 0.529279 | 3               | 3               | 12.92355         | 7.11534          | 3.2989            | 0.465232    |

**Table S20.** continuation

| Group 1 vs. Group 2                        | T-test for Independent Samples (Paclitaxel_FACS_SCC25_non-targeting siRNA + GJA1 siRNA) Note: Variables were treated as independent samples |                |                |    |                  |     |     |                  |                  |                   |                 |
|--------------------------------------------|---------------------------------------------------------------------------------------------------------------------------------------------|----------------|----------------|----|------------------|-----|-----|------------------|------------------|-------------------|-----------------|
|                                            | Mean Group 1                                                                                                                                | Mean Group 2   | t-value        | df | p                | N 1 | N 2 | Std.Dev. Group 1 | Std.Dev. Group 2 | F-ratio Variances | p Variances     |
| siControl Control UL vs. siGJA1 Control UL | 0.96667                                                                                                                                     | 1.06667        | -0.224         | 4  | 0.833443         | 3   | 3   | 0.62581          | 0.45181          | 1.919             | 0.685279        |
| siControl Control UR vs. siGJA1 Control UR | 8.650000                                                                                                                                    | 5.596667       | 1.659753       | 4  | 0.172302         | 3   | 3   | 2.975618         | 1.139488         | 6.819218          | 0.255780        |
| siControl Control LL vs. siGJA1 Control LL | 84.35667                                                                                                                                    | 89.41000       | -3.49253       | 4  | 0.025065         | 3   | 3   | 2.370956         | 0.811850         | 8.528954          | 0.209887        |
| siControl Control LR vs. siGJA1 Control LR | 6.023333                                                                                                                                    | 3.926667       | 2.006658       | 4  | 0.115237         | 3   | 3   | 1.373111         | 1.178870         | 1.356687          | 0.848649        |
| siControl 1 nM UL vs. siGJA1 1 nM UL       | 0.765000                                                                                                                                    | 1.276667       | -1.01651       | 3  | 0.384230         | 2   | 3   | 0.219203         | 0.657292         | 8.991328          | 0.459041        |
| siControl 1 nM UR vs. siGJA1 1 nM UR       | 6.125000                                                                                                                                    | 6.730000       | -0.310106      | 3  | 0.776774         | 2   | 3   | 1.576848         | 2.368101         | 2.255384          | 0.851969        |
| siControl 1 nM LL vs. siGJA1 1 nM LL       | 85.51500                                                                                                                                    | 87.94667       | -1.72975       | 3  | 0.182114         | 2   | 3   | 0.304056         | 1.873775         | 37.97765          | 0.227987        |
| siControl 1 nM LR vs. siGJA1 1 nM LR       | 7.595                                                                                                                                       | 4.046666<br>67 | 2.596318<br>94 | 3  | 0.080631<br>9866 | 2   | 3   | 1.0535891        | 1.67542035       | 2.52874495        | 0.81261277<br>6 |
| siControl 3 nM UL vs. siGJA1 3 nM UL       | 1.086667                                                                                                                                    | 1.273333       | -0.474662      | 4  | 0.659782         | 3   | 3   | 0.511599         | 0.449704         | 1.294215          | 0.871758        |
| siControl 3 nM UR vs. siGJA1 3 nM UR       | 12.31333                                                                                                                                    | 7.223333       | 1.649143       | 4  | 0.174464         | 3   | 3   | 5.104403         | 1.588595         | 10.32437          | 0.176610        |
| siControl 3 nM LL vs. siGJA1 3 nM LL       | 77.49667                                                                                                                                    | 86.04333       | -5.77273       | 4  | 0.004471         | 3   | 3   | 1.586957         | 2.014307         | 1.611094          | 0.765962        |
| siControl 3 nM LR vs. siGJA1 3 nM LR       | 9.103333                                                                                                                                    | 5.456667       | 1.306005       | 4  | 0.261592         | 3   | 3   | 4.248886         | 2.310115         | 3.382851          | 0.456324        |
| siControl 10 nM UL vs. siGJA1 10 nM UL     | 1.183333                                                                                                                                    | 1.310000       | -0.618234      | 4  | 0.569886         | 3   | 3   | 0.303699         | 0.183576         | 2.736894          | 0.535204        |
| siControl 10 nM UR vs. siGJA1 10 nM UR     | 13.19667                                                                                                                                    | 10.53000       | 1.434298       | 4  | 0.224798         | 3   | 3   | 2.488460         | 2.043918         | 1.482294          | 0.805706        |
| siControl 10 nM LL vs. siGJA1 10 nM LL     | 66.04000                                                                                                                                    | 78.63667       | -1.72860       | 4  | 0.158942         | 3   | 3   | 11.70201         | 4.729930         | 6.120851          | 0.280865        |
| siControl 10 nM LR vs. siGJA1 10 nM LR     | 19.58000                                                                                                                                    | 9.523333       | 1.584664       | 4  | 0.188220         | 3   | 3   | 10.06252         | 4.423826         | 5.173893          | 0.323945        |
| siControl 33 nM UL vs. siGJA1 33 nM UL     | 1.106667                                                                                                                                    | 2.100000       | -0.841714      | 4  | 0.447328         | 3   | 3   | 0.739076         | 1.905754         | 6.648990          | 0.261472        |
| siControl 33 nM UR vs. siGJA1 33 nM UR     | 22.90333                                                                                                                                    | 20.13333       | 0.925040       | 4  | 0.407300         | 3   | 3   | 4.158874         | 3.099070         | 1.800897          | 0.714057        |
| siControl 33 nM LL vs. siGJA1 33 nM LL     | 26.64333                                                                                                                                    | 51.02000       | -2.86013       | 4  | 0.045923         | 3   | 3   | 4.357721         | 14.10429         | 10.47571          | 0.174281        |
| siControl 33 nM LR vs. siGJA1 33 nM LR     | 49.35000                                                                                                                                    | 26.74667       | 2.525418       | 4  | 0.064981         | 3   | 3   | 8.561962         | 12.92355         | 2.278333          | 0.610066        |

**Table S20.** continuation

|                                          |                 |      |                      |   |                 |   |   |                 |                |                |                 |
|------------------------------------------|-----------------|------|----------------------|---|-----------------|---|---|-----------------|----------------|----------------|-----------------|
| siControl 100 nM UL vs. siGJA1 100 nM UL | 0.976666<br>667 | 1.46 | -<br>0.624113<br>577 | 4 | 0.566382<br>804 | 3 | 3 | 0.6357148<br>21 | 1.1811435<br>1 | 3.4520785<br>2 | 0.4492283<br>75 |
|------------------------------------------|-----------------|------|----------------------|---|-----------------|---|---|-----------------|----------------|----------------|-----------------|

|                                          |                |                |                      |   |                 |   |   |                |                |                |                 |
|------------------------------------------|----------------|----------------|----------------------|---|-----------------|---|---|----------------|----------------|----------------|-----------------|
| siControl 100 nM UR vs. siGJA1 100 nM UR | 22.11333<br>33 | 22.99333<br>33 | -<br>0.575127<br>912 | 4 | 0.596007<br>662 | 3 | 3 | 2.4300068<br>6 | 1.0576546<br>4 | 5.2787031<br>8 | 0.3185371<br>16 |
| siControl 100 nM LL vs. siGJA1 100 nM LL | 23.76000       | 42.94000       | -4.92271             | 4 | 0.007914        | 3 | 3 | 3.714243       | 5.634368       | 2.301176       | 0.605845        |
| siControl 100 nM LR vs. siGJA1 100 nM LR | 53.15000       | 32.60667       | 3.774588             | 4 | 0.019527        | 3 | 3 | 6.183494       | 7.115338       | 1.324107       | 0.860546        |

**Table S21.** Changes in the paclitaxel-induced apoptosis of Detroit 562 after knocking down Cx43. Annexin V-FLUOS/PI (Ann/PI)-stained HNSCC cells were analyzed by FACS after 48 h of treatment with paclitaxel at different concentrations. Live cells are presented by the Ann-/PI- fraction (LL), apoptotic cells by the Ann+/PI- fraction (LR), secondary necrotic cells by the Ann+/PI+ fraction (UR) and primary necrotic cells are detected in the Ann-/PI+ fraction (UL). (Figure S1).

| Concentration (nM) | Paclitaxel-induced apoptosis of non-targeting siRNA treated Detroit 562 cell (%) |          |          |       |      |          |
|--------------------|----------------------------------------------------------------------------------|----------|----------|-------|------|----------|
|                    | Sample 1                                                                         | Sample 2 | Sample 3 | Mean  | SD   |          |
| Control            | UL                                                                               | 2.27     | 5.11     | 4.42  | 3.9  | 1.481227 |
|                    | UR                                                                               | 9.65     | 23.53    | 21.54 | 18.2 | 7.505405 |
|                    | LL                                                                               | 85.95    | 61.36    | 64.44 | 70.6 | 13.39673 |
|                    | LR                                                                               | 2.13     | 9.99     | 9.6   | 7.2  | 4.429684 |
| 1                  | UL                                                                               | 1.92     | 3.92     | 5.14  | 3.7  | 1.625669 |
|                    | UR                                                                               | 10.31    | 19.98    | 21.01 | 17.1 | 5.902821 |
|                    | LL                                                                               | 85.6     | 65.96    | 64.5  | 72.0 | 11.78326 |
|                    | LR                                                                               | 2.17     | 10.14    | 9.35  | 7.2  | 4.39123  |
| 3                  | UL                                                                               | 1.48     | 4.73     | 4.74  | 3.7  | 1.879282 |
|                    | UR                                                                               | 8.37     | 23.57    | 20.16 | 17.4 | 7.975715 |
|                    | LL                                                                               | 87.51    | 62.06    | 65.35 | 71.6 | 13.84192 |
|                    | LR                                                                               | 2.64     | 9.64     | 9.75  | 7.3  | 4.073577 |
| 10                 | UL                                                                               | 1.89     | 5.4      | 7.21  | 4.8  | 2.704891 |
|                    | UR                                                                               | 10.45    | 25.26    | 25.36 | 20.4 | 8.579571 |
|                    | LL                                                                               | 85.42    | 57.81    | 57.43 | 66.9 | 16.05146 |
|                    | LR                                                                               | 2.25     | 11.52    | 10    | 7.9  | 4.971683 |
| 33                 | UL                                                                               | 5.71     | 10.01    | 9.09  | 8.3  | 2.264244 |
|                    | UR                                                                               | 16.41    | 42.56    | 41.89 | 33.6 | 14.90806 |
|                    | LL                                                                               | 71.68    | 30.71    | 33.3  | 45.2 | 22.94295 |
|                    | LR                                                                               | 6.2      | 16.71    | 15.72 | 12.9 | 5.803312 |
| 100                | UL                                                                               | 6.43     | 10.79    | 8.61  | 8.6  | 2.18     |



|                    | UR | 16.22                                                                          | 43.17    | 44.93    | 34.8  | 16.09174 |
|--------------------|----|--------------------------------------------------------------------------------|----------|----------|-------|----------|
|                    | LL | 68.53                                                                          | 29.88    | 29.38    | 42.6  | 22.46032 |
|                    | LR | 8.82                                                                           | 16.15    | 17.08    | 14.0  | 4.524404 |
| Concentration (nM) |    | Paclitaxel-induced apoptosis of <i>GJA1</i> siRNA treated Detroit 562 cell (%) |          |          |       |          |
|                    |    | Sample 1                                                                       | Sample 2 | Sample 3 | Mean  | SD       |
| Control            | UL | 1.14                                                                           | 2.32     | 2.36     | 1.94  | 0.693109 |
|                    | UR | 7.67                                                                           | 13.45    | 13.19    | 11.44 | 3.264618 |
|                    | LL | 89.03                                                                          | 76.51    | 77.14    | 80.89 | 7.053597 |
|                    | LR | 2.16                                                                           | 7.72     | 7.31     | 5.73  | 3.0985   |
| 1                  | UL | 0.65                                                                           | 1.90     | 2.41     | 1.65  | 0.905557 |
|                    | UR | 4.97                                                                           | 11.74    | 17.70    | 11.47 | 6.369294 |
|                    | LL | 91.26                                                                          | 80.33    | 72.84    | 81.48 | 9.263381 |
| 3                  | LR | 3.12                                                                           | 6.03     | 7.05     | 5.40  | 2.039338 |
|                    | UL | 0.75                                                                           | 1.67     | 2.61     | 1.68  | 0.930018 |
|                    | UR | 9.40                                                                           | 11.65    | 15.48    | 12.18 | 3.074026 |
| 3                  | LL | 87.29                                                                          | 79.93    | 74.43    | 80.55 | 6.452379 |
|                    | LR | 2.56                                                                           | 6.75     | 7.48     | 5.60  | 2.655039 |

**Table S21.** continuation

|     |    |       |       |       |       |          |
|-----|----|-------|-------|-------|-------|----------|
|     | UL | 1.92  | 3.72  | 4.33  | 3.32  | 1.25301  |
| 10  | UR | 6.67  | 12.50 | 16.13 | 11.77 | 4.772445 |
|     | LL | 88.79 | 75.33 | 69.40 | 77.84 | 9.935698 |
|     | LR | 2.61  | 8.45  | 10.14 | 7.07  | 3.951004 |
| 33  | UL | 3.67  | 9.91  | 6.73  | 6.77  | 3.120192 |
|     | UR | 13.15 | 27.32 | 33.32 | 24.60 | 10.35711 |
|     | LL | 74.76 | 46.26 | 44.53 | 55.18 | 16.97594 |
| 100 | LR | 8.42  | 16.51 | 15.42 | 13.45 | 4.390068 |
|     | UL | 4.78  | 11.86 | 7.40  | 8.01  | 3.579628 |
|     | UR | 11.96 | 32.33 | 37.78 | 27.36 | 13.60951 |
| 100 | LL | 71.41 | 38.77 | 39.04 | 49.74 | 18.76726 |
|     | LR | 11.85 | 17.04 | 15.78 | 14.89 | 2.707046 |

**Table S22.** Changes in the paclitaxel-induced apoptosis of Detroit 562 after knocking down Cx43. Annexin V-FLUOS/PI (Ann/PI)-stained HNSCC cells were analyzed by FACS after 48 h of treatment with paclitaxel at different concentrations. Live cells are presented by the Ann-/PI- fraction (LL), apoptotic cells by the Ann+/PI- fraction (LR), secondary necrotic cells by the Ann+/PI+ fraction (UR) and primary necrotic cells are detected in the Ann-/PI+ fraction (UL). Statistical analysis was performed by Student's t-test, the cell fractions in all concentration were compared to negative control fractions in non-targeting siRNA or *GJA1* siRNA treated samples. The cell fractions in *GJA1* siRNA treated samples were also compared to cell

fractions in non-targeting siRNA treated samples.

Red color indicate if  $p < 0.05$ . (Figure S1).

| Group 1 vs. Group 2      | T-test for Independent Samples (Paclitaxel_FACS_Detroit562_non-targeting siRNA) Note: Variables were treated as independent samples |              |          |    |          |                 |                 |                  |                  |                   |             |
|--------------------------|-------------------------------------------------------------------------------------------------------------------------------------|--------------|----------|----|----------|-----------------|-----------------|------------------|------------------|-------------------|-------------|
|                          | Mean Group 1                                                                                                                        | Mean Group 2 | t-value  | df | p        | Valid N Group 1 | Valid N Group 2 | Std.Dev. Group 1 | Std.Dev. Group 2 | F-ratio Variances | p Variances |
| Control UL vs. 1 nM UL   | 3.933333                                                                                                                            | 3.660000     | 0.21526  | 4  | 0.840091 | 3               | 3               | 1.481227         | 1.625669         | 1.204540          | 0.907219    |
| Control UL vs. 3 nM UL   | 3.933333                                                                                                                            | 3.650000     | 0.20509  | 4  | 0.847516 | 3               | 3               | 1.481227         | 1.879282         | 1.609684          | 0.766376    |
| Control UL vs. 10 nM UL  | 3.933333                                                                                                                            | 4.833333     | -0.50548 | 4  | 0.639805 | 3               | 3               | 1.481227         | 2.704891         | 3.334696          | 0.461393    |
| Control UL vs. 33 nM UL  | 3.933333                                                                                                                            | 8.270000     | -2.77611 | 4  | 0.050017 | 3               | 3               | 1.481227         | 2.264244         | 2.336701          | 0.599394    |
| Control UL vs. 100 nM UL | 3.933333                                                                                                                            | 8.610000     | -3.07338 | 4  | 0.037170 | 3               | 3               | 1.481227         | 2.180000         | 2.166056          | 0.631701    |
| 1 nM UL vs. 3 nM UL      | 3.660000                                                                                                                            | 3.650000     | 0.00697  | 4  | 0.994772 | 3               | 3               | 1.625669         | 1.879282         | 1.336348          | 0.856037    |
| 1 nM UL vs. 10 nM UL     | 3.660000                                                                                                                            | 4.833333     | -0.64398 | 4  | 0.554658 | 3               | 3               | 1.625669         | 2.704891         | 2.768440          | 0.530724    |
| 1 nM UL vs. 33 nM UL     | 3.660000                                                                                                                            | 8.270000     | -2.86459 | 4  | 0.045717 | 3               | 3               | 1.625669         | 2.264244         | 1.939912          | 0.680292    |
| 1 nM UL vs. 100 nM UL    | 3.660000                                                                                                                            | 8.610000     | -3.15276 | 4  | 0.034423 | 3               | 3               | 1.625669         | 2.180000         | 1.798244          | 0.714734    |
| 3 nM UL vs. 10 nM UL     | 3.650000                                                                                                                            | 4.833333     | -0.62229 | 4  | 0.567470 | 3               | 3               | 1.879282         | 2.704891         | 2.071646          | 0.651117    |
| 3 nM UL vs. 33 nM UL     | 3.650000                                                                                                                            | 8.270000     | -2.71945 | 4  | 0.053017 | 3               | 3               | 1.879282         | 2.264244         | 1.451652          | 0.815776    |
| 3 nM UL vs. 100 nM UL    | 3.650000                                                                                                                            | 8.610000     | -2.98483 | 4  | 0.040545 | 3               | 3               | 1.879282         | 2.180000         | 1.345641          | 0.852645    |
| 10 nM UL vs. 33 nM UL    | 4.833333                                                                                                                            | 8.270000     | -1.68745 | 4  | 0.166791 | 3               | 3               | 2.704891         | 2.264244         | 1.427096          | 0.824030    |
| 10 nM UL vs. 100 nM UL   | 4.833333                                                                                                                            | 8.610000     | -1.88294 | 4  | 0.132829 | 3               | 3               | 2.704891         | 2.180000         | 1.539524          | 0.787549    |
| 33 nM UL vs. 100 nM UL   | 8.270000                                                                                                                            | 8.610000     | -0.18736 | 4  | 0.860498 | 3               | 3               | 2.264244         | 2.180000         | 1.078781          | 0.962102    |

**Table S22.** continuation

| Group 1 vs. Group 2      | T-test for Independent Samples (Paclitaxel_FACS_Detroit562_non-targeting siRNA) Note: Variables were treated as independent samples |              |          |    |          |                 |                 |                  |                  |                   |             |
|--------------------------|-------------------------------------------------------------------------------------------------------------------------------------|--------------|----------|----|----------|-----------------|-----------------|------------------|------------------|-------------------|-------------|
|                          | Mean Group 1                                                                                                                        | Mean Group 2 | t-value  | df | p        | Valid N Group 1 | Valid N Group 2 | Std.Dev. Group 1 | Std.Dev. Group 2 | F-ratio Variances | p Variances |
| Control UR vs. 1 nM UR   | 18.24000                                                                                                                            | 17.10000     | 0.20679  | 4  | 0.846274 | 3               | 3               | 7.50540          | 5.90282          | 1.616698          | 0.764322    |
| Control UR vs. 3 nM UR   | 18.24000                                                                                                                            | 17.36667     | 0.13812  | 4  | 0.896821 | 3               | 3               | 7.50540          | 7.97572          | 1.129252          | 0.939297    |
| Control UR vs. 10 nM UR  | 18.24000                                                                                                                            | 20.35667     | -0.32162 | 4  | 0.763847 | 3               | 3               | 7.50540          | 8.57957          | 1.306721          | 0.867032    |
| Control UR vs. 33 nM UR  | 18.24000                                                                                                                            | 33.62000     | -1.59603 | 4  | 0.185716 | 3               | 3               | 7.50540          | 14.90806         | 3.945428          | 0.404414    |
| Control UR vs. 100 nM UR | 18.24000                                                                                                                            | 34.77333     | -1.61278 | 4  | 0.182087 | 3               | 3               | 7.50540          | 16.09174         | 4.596822          | 0.357346    |
| 1 nM UR vs. 3 nM UR      | 17.10000                                                                                                                            | 17.36667     | -0.04655 | 4  | 0.965104 | 3               | 3               | 5.90282          | 7.97572          | 1.825660          | 0.707799    |

|                        |          |          |          |   |          |   |   |          |          |          |          |
|------------------------|----------|----------|----------|---|----------|---|---|----------|----------|----------|----------|
| 1 nM UR vs. 10 nM UR   | 17.10000 | 20.35667 | -0.54164 | 4 | 0.616823 | 3 | 3 | 5.90282  | 8.57957  | 2.112574 | 0.642555 |
| 1 nM UR vs. 33 nM UR   | 17.10000 | 33.62000 | -1.78453 | 4 | 0.148895 | 3 | 3 | 5.90282  | 14.90806 | 6.378566 | 0.271055 |
| 1 nM UR vs. 100 nM UR  | 17.10000 | 34.77333 | -1.78592 | 4 | 0.148655 | 3 | 3 | 5.90282  | 16.09174 | 7.431674 | 0.237201 |
| 3 nM UR vs. 10 nM UR   | 17.36667 | 20.35667 | -0.44210 | 4 | 0.681268 | 3 | 3 | 7.97572  | 8.57957  | 1.157156 | 0.927147 |
| 3 nM UR vs. 33 nM UR   | 17.36667 | 33.62000 | -1.66504 | 4 | 0.171236 | 3 | 3 | 7.97572  | 14.90806 | 3.493841 | 0.445054 |
| 3 nM UR vs. 100 nM UR  | 17.36667 | 34.77333 | -1.67870 | 4 | 0.168511 | 3 | 3 | 7.97572  | 16.09174 | 4.070677 | 0.394425 |
| 10 nM UR vs. 33 nM UR  | 20.35667 | 33.62000 | -1.33558 | 4 | 0.252616 | 3 | 3 | 8.57957  | 14.90806 | 3.019335 | 0.497595 |
| 10 nM UR vs. 100 nM UR | 20.35667 | 34.77333 | -1.36929 | 4 | 0.242755 | 3 | 3 | 8.57957  | 16.09174 | 3.517830 | 0.442690 |
| 33 nM UR vs. 100 nM UR | 33.62000 | 34.77333 | -0.09107 | 4 | 0.931818 | 3 | 3 | 14.90806 | 16.09174 | 1.165101 | 0.923744 |

Table S22. continuation

| Group 1 vs. Group 2      | T-test for Independent Samples (Paclitaxel_FACS_Detroit562_non-targeting siRNA) Note: Variables were treated as independent samples |              |          |    |          |                 |                 |                  |                  |                   |             |
|--------------------------|-------------------------------------------------------------------------------------------------------------------------------------|--------------|----------|----|----------|-----------------|-----------------|------------------|------------------|-------------------|-------------|
|                          | Mean Group 1                                                                                                                        | Mean Group 2 | t-value  | df | p        | Valid N Group 1 | Valid N Group 2 | Std.Dev. Group 1 | Std.Dev. Group 2 | F-ratio Variances | p Variances |
| Control LL vs. 1 nM LL   | 70.58333                                                                                                                            | 72.02000     | -0.13947 | 4  | 0.895818 | 3               | 3               | 13.39673         | 11.78326         | 1.292608          | 0.872369    |
| Control LL vs. 3 nM LL   | 70.58333                                                                                                                            | 71.64000     | -0.09501 | 4  | 0.928876 | 3               | 3               | 13.39673         | 13.84192         | 1.067566          | 0.967321    |
| Control LL vs. 10 nM LL  | 70.58333                                                                                                                            | 66.88667     | 0.30625  | 4  | 0.774696 | 3               | 3               | 13.39673         | 16.05146         | 1.435593          | 0.821155    |
| Control LL vs. 33 nM LL  | 70.58333                                                                                                                            | 45.23000     | 1.65287  | 4  | 0.173701 | 3               | 3               | 13.39673         | 22.94295         | 2.932923          | 0.508528    |
| Control LL vs. 100 nM LL | 70.58333                                                                                                                            | 42.59667     | 1.85355  | 4  | 0.137424 | 3               | 3               | 13.39673         | 22.46032         | 2.810826          | 0.524821    |
| 1 nM LL vs. 3 nM LL      | 72.02000                                                                                                                            | 71.64000     | 0.03621  | 4  | 0.972852 | 3               | 3               | 11.78326         | 13.84192         | 1.379945          | 0.840356    |
| 1 nM LL vs. 10 nM LL     | 72.02000                                                                                                                            | 66.88667     | 0.44652  | 4  | 0.678329 | 3               | 3               | 11.78326         | 16.05146         | 1.855660          | 0.700364    |
| 1 nM LL vs. 33 nM LL     | 72.02000                                                                                                                            | 45.23000     | 1.79908  | 4  | 0.146396 | 3               | 3               | 11.78326         | 22.94295         | 3.791121          | 0.417439    |
| 1 nM LL vs. 100 nM LL    | 72.02000                                                                                                                            | 42.59667     | 2.00929  | 4  | 0.114892 | 3               | 3               | 11.78326         | 22.46032         | 3.633297          | 0.431658    |
| 3 nM LL vs. 10 nM LL     | 71.64000                                                                                                                            | 66.88667     | 0.38843  | 4  | 0.717484 | 3               | 3               | 13.84192         | 16.05146         | 1.344735          | 0.852975    |
| 3 nM LL vs. 33 nM LL     | 71.64000                                                                                                                            | 45.23000     | 1.70716  | 4  | 0.162982 | 3               | 3               | 13.84192         | 22.94295         | 2.747299          | 0.533718    |
| 3 nM LL vs. 100 nM LL    | 71.64000                                                                                                                            | 42.59667     | 1.90670  | 4  | 0.129237 | 3               | 3               | 13.84192         | 22.46032         | 2.632929          | 0.550520    |
| 10 nM LL vs. 33 nM LL    | 66.88667                                                                                                                            | 45.23000     | 1.33963  | 4  | 0.251410 | 3               | 3               | 16.05146         | 22.94295         | 2.043004          | 0.657245    |
| 10 nM LL vs. 100 nM LL   | 66.88667                                                                                                                            | 42.59667     | 1.52397  | 4  | 0.202192 | 3               | 3               | 16.05146         | 22.46032         | 1.957954          | 0.676143    |
| 33 nM LL vs. 100 nM LL   | 45.23000                                                                                                                            | 42.59667     | 0.14206  | 4  | 0.893901 | 3               | 3               | 22.94295         | 22.46032         | 1.043438          | 0.978743    |

**Table S22.** continuation

| Group 1 vs. Group 2      | T-test for Independent Samples (Paclitaxel_FACS_Detroit562_non-targeting siRNA) Note: Variables were treated as independent samples |              |          |    |          |                 |                 |                  |                  |                   |             |
|--------------------------|-------------------------------------------------------------------------------------------------------------------------------------|--------------|----------|----|----------|-----------------|-----------------|------------------|------------------|-------------------|-------------|
|                          | Mean Group 1                                                                                                                        | Mean Group 2 | t-value  | df | p        | Valid N Group 1 | Valid N Group 2 | Std.Dev. Group 1 | Std.Dev. Group 2 | F-ratio Variances | p Variances |
| Control LR vs. 1 nM LR   | 7.24000                                                                                                                             | 7.22000      | 0.00555  | 4  | 0.995835 | 3               | 3               | 4.429684         | 4.391230         | 1.017591          | 0.991281    |
| Control LR vs. 3 nM LR   | 7.24000                                                                                                                             | 7.34333      | -0.02974 | 4  | 0.977699 | 3               | 3               | 4.429684         | 4.073577         | 1.182479          | 0.916389    |
| Control LR vs. 10 nM LR  | 7.24000                                                                                                                             | 7.92333      | -0.17774 | 4  | 0.867562 | 3               | 3               | 4.429684         | 4.971683         | 1.259683          | 0.885080    |
| Control LR vs. 33 nM LR  | 7.24000                                                                                                                             | 12.87667     | -1.33726 | 4  | 0.252115 | 3               | 3               | 4.429684         | 5.803312         | 1.716352          | 0.736282    |
| Control LR vs. 100 nM LR | 7.24000                                                                                                                             | 14.01667     | -1.85373 | 4  | 0.137395 | 3               | 3               | 4.429684         | 4.524404         | 1.043223          | 0.978845    |
| 1 nM LR vs. 3 nM LR      | 7.22000                                                                                                                             | 7.34333      | -0.03566 | 4  | 0.973259 | 3               | 3               | 4.391230         | 4.073577         | 1.162038          | 0.925053    |
| 1 nM LR vs. 10 nM LR     | 7.22000                                                                                                                             | 7.92333      | -0.18365 | 4  | 0.863221 | 3               | 3               | 4.391230         | 4.971683         | 1.281842          | 0.876485    |
| 1 nM LR vs. 33 nM LR     | 7.22000                                                                                                                             | 12.87667     | -1.34630 | 4  | 0.249439 | 3               | 3               | 4.391230         | 5.803312         | 1.746544          | 0.728188    |
| 1 nM LR vs. 100 nM LR    | 7.22000                                                                                                                             | 14.01667     | -1.86711 | 4  | 0.135282 | 3               | 3               | 4.391230         | 4.524404         | 1.061574          | 0.970132    |
| 3 nM LR vs. 10 nM LR     | 7.34333                                                                                                                             | 7.92333      | -0.15630 | 4  | 0.883370 | 3               | 3               | 4.073577         | 4.971683         | 1.489549          | 0.803358    |
| 3 nM LR vs. 33 nM LR     | 7.34333                                                                                                                             | 12.87667     | -1.35171 | 4  | 0.247851 | 3               | 3               | 4.073577         | 5.803312         | 2.029551          | 0.660164    |
| 3 nM LR vs. 100 nM LR    | 7.34333                                                                                                                             | 14.01667     | -1.89857 | 4  | 0.130454 | 3               | 3               | 4.073577         | 4.524404         | 1.233590          | 0.895419    |
| 10 nM LR vs. 33 nM LR    | 7.92333                                                                                                                             | 12.87667     | -1.12271 | 4  | 0.324393 | 3               | 3               | 4.971683         | 5.803312         | 1.362527          | 0.846551    |
| 10 nM LR vs. 100 nM LR   | 7.92333                                                                                                                             | 14.01667     | -1.57002 | 4  | 0.191498 | 3               | 3               | 4.971683         | 4.524404         | 1.207492          | 0.906006    |
| 33 nM LR vs. 100 nM LR   | 12.87667                                                                                                                            | 14.01667     | -0.26833 | 4  | 0.801714 | 3               | 3               | 5.803312         | 4.524404         | 1.645239          | 0.756075    |

**Table S22.** continuation

| Group 1 vs. Group 2      | T-test for Independent Samples (Paclitaxel_FACS_Detroit562_GJA1 siRNA) Note: Variables were treated as independent samples |              |          |    |          |                 |                 |                  |                  |                   |             |
|--------------------------|----------------------------------------------------------------------------------------------------------------------------|--------------|----------|----|----------|-----------------|-----------------|------------------|------------------|-------------------|-------------|
|                          | Mean Group 1                                                                                                               | Mean Group 2 | t-value  | df | p        | Valid N Group 1 | Valid N Group 2 | Std.Dev. Group 1 | Std.Dev. Group 2 | F-ratio Variances | p Variances |
| Control UL vs. 1 nM UL   | 1.940000                                                                                                                   | 1.653333     | 0.43541  | 4  | 0.685733 | 3               | 3               | 0.693109         | 0.905557         | 1.70698           | 0.738831    |
| Control UL vs. 3 nM UL   | 1.940000                                                                                                                   | 1.676667     | 0.39323  | 4  | 0.714205 | 3               | 3               | 0.693109         | 0.930018         | 1.80044           | 0.714172    |
| Control UL vs. 10 nM UL  | 1.940000                                                                                                                   | 3.323333     | -1.67326 | 4  | 0.169590 | 3               | 3               | 0.693109         | 1.253010         | 3.26818           | 0.468584    |
| Control UL vs. 33 nM UL  | 1.940000                                                                                                                   | 6.770000     | -2.61738 | 4  | 0.058961 | 3               | 3               | 0.693109         | 3.120192         | 20.26561          | 0.094049    |
| Control UL vs. 100 nM UL | 1.940000                                                                                                                   | 8.013333     | -2.88508 | 4  | 0.044784 | 3               | 3               | 0.693109         | 3.579628         | 26.67305          | 0.072272    |
| 1 nM UL vs. 3 nM UL      | 1.653333                                                                                                                   | 1.676667     | -0.03113 | 4  | 0.976654 | 3               | 3               | 0.905557         | 0.930018         | 1.05475           | 0.973353    |

|                        |          |          |          |   |          |   |   |          |          |          |          |
|------------------------|----------|----------|----------|---|----------|---|---|----------|----------|----------|----------|
| 1 nM UL vs. 10 nM UL   | 1.653333 | 3.323333 | -1.87099 | 4 | 0.134676 | 3 | 3 | 0.905557 | 1.253010 | 1.91460  | 0.686201 |
| 1 nM UL vs. 33 nM UL   | 1.653333 | 6.770000 | -2.72776 | 4 | 0.052564 | 3 | 3 | 0.905557 | 3.120192 | 11.87220 | 0.155374 |
| 1 nM UL vs. 100 nM UL  | 1.653333 | 8.013333 | -2.98339 | 4 | 0.040603 | 3 | 3 | 0.905557 | 3.579628 | 15.62587 | 0.120294 |
| 3 nM UL vs. 10 nM UL   | 1.676667 | 3.323333 | -1.82776 | 4 | 0.141595 | 3 | 3 | 0.930018 | 1.253010 | 1.81521  | 0.710427 |
| 3 nM UL vs. 33 nM UL   | 1.676667 | 6.770000 | -2.70956 | 4 | 0.053562 | 3 | 3 | 0.930018 | 3.120192 | 11.25590 | 0.163187 |
| 3 nM UL vs. 100 nM UL  | 1.676667 | 8.013333 | -2.96756 | 4 | 0.041244 | 3 | 3 | 0.930018 | 3.579628 | 14.81471 | 0.126465 |
| 10 nM UL vs. 33 nM UL  | 3.323333 | 6.770000 | -1.77547 | 4 | 0.150477 | 3 | 3 | 1.253010 | 3.120192 | 6.20089  | 0.277744 |
| 10 nM UL vs. 100 nM UL | 3.323333 | 8.013333 | -2.14189 | 4 | 0.098878 | 3 | 3 | 1.253010 | 3.579628 | 8.16144  | 0.218306 |
| 33 nM UL vs. 100 nM UL | 6.770000 | 8.013333 | -0.45350 | 4 | 0.673700 | 3 | 3 | 3.120192 | 3.579628 | 1.31617  | 0.863493 |

Table S22. continuation

| Group 1 vs. Group 2      | T-test for Independent Samples (Paclitaxel_FACS_Detroit562_GJA1 siRNA) Note: Variables were treated as independent samples |              |          |    |          |                 |                 |                  |                  |                   |             |
|--------------------------|----------------------------------------------------------------------------------------------------------------------------|--------------|----------|----|----------|-----------------|-----------------|------------------|------------------|-------------------|-------------|
|                          | Mean Group 1                                                                                                               | Mean Group 2 | t-value  | df | p        | Valid N Group 1 | Valid N Group 2 | Std.Dev. Group 1 | Std.Dev. Group 2 | F-ratio Variances | p Variances |
| Control UR vs. 1 nM UR   | 11.43667                                                                                                                   | 11.47000     | -0.00807 | 4  | 0.993950 | 3               | 3               | 3.26462          | 6.36929          | 3.80643           | 0.416109    |
| Control UR vs. 3 nM UR   | 11.43667                                                                                                                   | 12.17667     | -0.28583 | 4  | 0.789196 | 3               | 3               | 3.26462          | 3.07403          | 1.12785           | 0.939918    |
| Control UR vs. 10 nM UR  | 11.43667                                                                                                                   | 11.76667     | -0.09885 | 4  | 0.926012 | 3               | 3               | 3.26462          | 4.77245          | 2.13706           | 0.637539    |
| Control UR vs. 33 nM UR  | 11.43667                                                                                                                   | 24.59667     | -2.09898 | 4  | 0.103772 | 3               | 3               | 3.26462          | 10.35711         | 10.06496          | 0.180751    |
| Control UR vs. 100 nM UR | 11.43667                                                                                                                   | 27.35667     | -1.97021 | 4  | 0.120141 | 3               | 3               | 3.26462          | 13.60951         | 17.37880          | 0.108821    |
| 1 nM UR vs. 3 nM UR      | 11.47000                                                                                                                   | 12.17667     | -0.17307 | 4  | 0.871003 | 3               | 3               | 6.36929          | 3.07403          | 4.29307           | 0.377853    |
| 1 nM UR vs. 10 nM UR     | 11.47000                                                                                                                   | 11.76667     | -0.06456 | 4  | 0.951621 | 3               | 3               | 6.36929          | 4.77245          | 1.78115           | 0.719127    |
| 1 nM UR vs. 33 nM UR     | 11.47000                                                                                                                   | 24.59667     | -1.86992 | 4  | 0.134844 | 3               | 3               | 6.36929          | 10.35711         | 2.64420           | 0.548817    |
| 1 nM UR vs. 100 nM UR    | 11.47000                                                                                                                   | 27.35667     | -1.83124 | 4  | 0.141025 | 3               | 3               | 6.36929          | 13.60951         | 4.56565           | 0.359347    |
| 3 nM UR vs. 10 nM UR     | 12.17667                                                                                                                   | 11.76667     | 0.12510  | 4  | 0.906483 | 3               | 3               | 3.07403          | 4.77245          | 2.41028           | 0.586463    |
| 3 nM UR vs. 33 nM UR     | 12.17667                                                                                                                   | 24.59667     | -1.99118 | 4  | 0.117292 | 3               | 3               | 3.07403          | 10.35711         | 11.35172          | 0.161921    |
| 3 nM UR vs. 100 nM UR    | 12.17667                                                                                                                   | 27.35667     | -1.88445 | 4  | 0.132598 | 3               | 3               | 3.07403          | 13.60951         | 19.60062          | 0.097084    |
| 10 nM UR vs. 33 nM UR    | 11.76667                                                                                                                   | 24.59667     | -1.94867 | 4  | 0.123145 | 3               | 3               | 4.77245          | 10.35711         | 4.70972           | 0.350280    |
| 10 nM UR vs. 100 nM UR   | 11.76667                                                                                                                   | 27.35667     | -1.87232 | 4  | 0.134470 | 3               | 3               | 4.77245          | 13.60951         | 8.13210           | 0.219008    |
| 33 nM UR vs. 100 nM UR   | 24.59667                                                                                                                   | 27.35667     | -0.27952 | 4  | 0.793703 | 3               | 3               | 10.35711         | 13.60951         | 1.72666           | 0.733497    |

Table S22. continuation

| Group 1 vs.<br>Group 2   | T-test for Independent Samples (Paclitaxel_FACS_Detroit562_GJA1 siRNA) Note: Variables were treated as independent samples |              |          |    |          |                 |                 |                  |                  |                   |             |
|--------------------------|----------------------------------------------------------------------------------------------------------------------------|--------------|----------|----|----------|-----------------|-----------------|------------------|------------------|-------------------|-------------|
|                          | Mean Group 1                                                                                                               | Mean Group 2 | t-value  | df | p        | Valid N Group 1 | Valid N Group 2 | Std.Dev. Group 1 | Std.Dev. Group 2 | F-ratio Variances | p Variances |
| Control LL vs. 1 nM LL   | 80.89333                                                                                                                   | 81.47667     | -0.08678 | 4  | 0.935019 | 3               | 3               | 7.05360          | 9.26338          | 1.724717          | 0.734021    |
| Control LL vs. 3 nM LL   | 80.89333                                                                                                                   | 80.55000     | 0.06221  | 4  | 0.953383 | 3               | 3               | 7.05360          | 6.45238          | 1.195037          | 0.911146    |
| Control LL vs. 10 nM LL  | 80.89333                                                                                                                   | 77.84000     | 0.43402  | 4  | 0.686656 | 3               | 3               | 7.05360          | 9.93570          | 1.984154          | 0.670207    |
| Control LL vs. 33 nM LL  | 80.89333                                                                                                                   | 55.18333     | 2.42240  | 4  | 0.072575 | 3               | 3               | 7.05360          | 16.97594         | 5.792239          | 0.294454    |
| Control LL vs. 100 nM LL | 80.89333                                                                                                                   | 49.74000     | 2.69136  | 4  | 0.054581 | 3               | 3               | 7.05360          | 18.76726         | 7.079136          | 0.247551    |
| 1 nM LL vs. 3 nM LL      | 81.47667                                                                                                                   | 80.55000     | 0.14218  | 4  | 0.893815 | 3               | 3               | 9.26338          | 6.45238          | 2.061101          | 0.653360    |
| 1 nM LL vs. 10 nM LL     | 81.47667                                                                                                                   | 77.84000     | 0.46370  | 4  | 0.666975 | 3               | 3               | 9.26338          | 9.93570          | 1.150423          | 0.930049    |
| 1 nM LL vs. 33 nM LL     | 81.47667                                                                                                                   | 55.18333     | 2.35491  | 4  | 0.078095 | 3               | 3               | 9.26338          | 16.97594         | 3.358371          | 0.458887    |
| 1 nM LL vs. 100 nM LL    | 81.47667                                                                                                                   | 49.74000     | 2.62648  | 4  | 0.058401 | 3               | 3               | 9.26338          | 18.76726         | 4.104521          | 0.391810    |
| 3 nM LL vs. 10 nM LL     | 80.55000                                                                                                                   | 77.84000     | 0.39621  | 4  | 0.712179 | 3               | 3               | 6.45238          | 9.93570          | 2.371139          | 0.593271    |
| 3 nM LL vs. 33 nM LL     | 80.55000                                                                                                                   | 55.18333     | 2.41929  | 4  | 0.072819 | 3               | 3               | 6.45238          | 16.97594         | 6.921943          | 0.252463    |
| 3 nM LL vs. 100 nM LL    | 80.55000                                                                                                                   | 49.74000     | 2.68900  | 4  | 0.054715 | 3               | 3               | 6.45238          | 18.76726         | 8.459833          | 0.211420    |
| 10 nM LL vs. 33 nM LL    | 77.84000                                                                                                                   | 55.18333     | 1.99506  | 4  | 0.116773 | 3               | 3               | 9.93570          | 16.97594         | 2.919248          | 0.510302    |
| 10 nM LL vs. 100 nM LL   | 77.84000                                                                                                                   | 49.74000     | 2.29199  | 4  | 0.083673 | 3               | 3               | 9.93570          | 18.76726         | 3.567835          | 0.437844    |
| 33 nM LL vs. 100 nM LL   | 55.18333                                                                                                                   | 49.74000     | 0.37257  | 4  | 0.728372 | 3               | 3               | 16.97594         | 18.76726         | 1.222176          | 0.900019    |

Table S22. continuation

| Group 1 vs.<br>Group 2   | T-test for Independent Samples (Paclitaxel_FACS_Detroit562_GJA1 siRNA) Note: Variables were treated as independent samples |              |          |    |          |                 |                 |                  |                  |                   |             |
|--------------------------|----------------------------------------------------------------------------------------------------------------------------|--------------|----------|----|----------|-----------------|-----------------|------------------|------------------|-------------------|-------------|
|                          | Mean Group 1                                                                                                               | Mean Group 2 | t-value  | df | p        | Valid N Group 1 | Valid N Group 2 | Std.Dev. Group 1 | Std.Dev. Group 2 | F-ratio Variances | p Variances |
| Control LR vs. 1 nM LR   | 5.73000                                                                                                                    | 5.40000      | 0.15409  | 4  | 0.885001 | 3               | 3               | 3.098500         | 2.039338         | 2.308471          | 0.604509    |
| Control LR vs. 3 nM LR   | 5.73000                                                                                                                    | 5.59667      | 0.05660  | 4  | 0.957581 | 3               | 3               | 3.098500         | 2.655039         | 1.361950          | 0.846758    |
| Control LR vs. 10 nM LR  | 5.73000                                                                                                                    | 7.06667      | -0.46109 | 4  | 0.668690 | 3               | 3               | 3.098500         | 3.951004         | 1.625968          | 0.761624    |
| Control LR vs. 33 nM LR  | 5.73000                                                                                                                    | 13.45000     | -2.48845 | 4  | 0.067596 | 3               | 3               | 3.098500         | 4.390068         | 2.007427          | 0.665020    |
| Control LR vs. 100 nM LR | 5.73000                                                                                                                    | 14.89000     | -3.85605 | 4  | 0.018208 | 3               | 3               | 3.098500         | 2.707046         | 1.310121          | 0.865755    |
| 1 nM LR vs. 3 nM LR      | 5.40000                                                                                                                    | 5.59667      | -0.10175 | 4  | 0.923853 | 3               | 3               | 2.039338         | 2.655039         | 1.694975          | 0.742122    |

|                        |          |          |          |   |          |   |   |          |          |          |          |
|------------------------|----------|----------|----------|---|----------|---|---|----------|----------|----------|----------|
| 1 nM LR vs. 10 nM LR   | 5.40000  | 7.06667  | -0.64925 | 4 | 0.551572 | 3 | 3 | 2.039338 | 3.951004 | 3.753501 | 0.420743 |
| 1 nM LR vs. 33 nM LR   | 5.40000  | 13.45000 | -2.88042 | 4 | 0.044994 | 3 | 3 | 2.039338 | 4.390068 | 4.634086 | 0.354982 |
| 1 nM LR vs. 100 nM LR  | 5.40000  | 14.89000 | -4.84980 | 4 | 0.008341 | 3 | 3 | 2.039338 | 2.707046 | 1.762028 | 0.724106 |
| 3 nM LR vs. 10 nM LR   | 5.59667  | 7.06667  | -0.53487 | 4 | 0.621087 | 3 | 3 | 2.655039 | 3.951004 | 2.214487 | 0.622183 |
| 3 nM LR vs. 33 nM LR   | 5.59667  | 13.45000 | -2.65128 | 4 | 0.056906 | 3 | 3 | 2.655039 | 4.390068 | 2.734014 | 0.535617 |
| 3 nM LR vs. 100 nM LR  | 5.59667  | 14.89000 | -4.24515 | 4 | 0.013209 | 3 | 3 | 2.655039 | 2.707046 | 1.039560 | 0.980604 |
| 10 nM LR vs. 33 nM LR  | 7.06667  | 13.45000 | -1.87198 | 4 | 0.134523 | 3 | 3 | 3.951004 | 4.390068 | 1.234604 | 0.895013 |
| 10 nM LR vs. 100 nM LR | 7.06667  | 14.89000 | -2.82924 | 4 | 0.047382 | 3 | 3 | 3.951004 | 2.707046 | 2.130216 | 0.638934 |
| 33 nM LR vs. 100 nM LR | 13.45000 | 14.89000 | -0.48359 | 4 | 0.653958 | 3 | 3 | 4.390068 | 2.707046 | 2.629972 | 0.550968 |

Table S22. continuation

| Group 1 vs. Group 2                        | T-test for Independent Samples (Paclitaxel_FACS_Detroit562_non-targeting siRNA + GJA1 siRNA) Note: Variables were treated as independent samples |              |          |    |          |     |     |                  |                  |                   |             |
|--------------------------------------------|--------------------------------------------------------------------------------------------------------------------------------------------------|--------------|----------|----|----------|-----|-----|------------------|------------------|-------------------|-------------|
|                                            | Mean Group 1                                                                                                                                     | Mean Group 2 | t-value  | df | p        | N 1 | N 2 | Std.Dev. Group 1 | Std.Dev. Group 2 | F-ratio Variances | p Variances |
| siControl Control UL vs. siGJA1 Control UL | 3.933333                                                                                                                                         | 1.940000     | 2.111177 | 4  | 0.102355 | 3   | 3   | 1.481227         | 0.693109         | 4.567097          | 0.359254    |
| siControl Control UR vs. siGJA1 Control UR | 18.24000                                                                                                                                         | 11.43667     | 1.439730 | 4  | 0.223358 | 3   | 3   | 7.505405         | 3.264618         | 5.285467          | 0.318194    |
| siControl Control LL vs. siGJA1 Control LL | 70.58333                                                                                                                                         | 80.89333     | -1.17947 | 4  | 0.303570 | 3   | 3   | 13.39673         | 7.053597         | 3.607252          | 0.434098    |
| siControl Control LR vs. siGJA1 Control LR | 7.240000                                                                                                                                         | 5.730000     | 0.483812 | 4  | 0.653813 | 3   | 3   | 4.429684         | 3.098500         | 2.043820          | 0.657069    |
| siControl 1 nM UL vs. siGJA1 1 nM UL       | 3.660000                                                                                                                                         | 1.653333     | 1.867756 | 4  | 0.135182 | 3   | 3   | 1.625669         | 0.905557         | 3.222796          | 0.473620    |
| siControl 1 nM UR vs. siGJA1 1 nM UR       | 17.10000                                                                                                                                         | 11.47000     | 1.122926 | 4  | 0.324310 | 3   | 3   | 5.902821         | 6.369294         | 1.164296          | 0.924088    |
| siControl 1 nM LL vs. siGJA1 1 nM LL       | 72.02000                                                                                                                                         | 81.47667     | -1.09280 | 4  | 0.335884 | 3   | 3   | 11.78326         | 9.263381         | 1.618049          | 0.763928    |
| siControl 1 nM LR vs. siGJA1 1 nM LR       | 7.220000                                                                                                                                         | 5.400000     | 0.651083 | 4  | 0.550503 | 3   | 3   | 4.391230         | 2.039338         | 4.636539          | 0.354828    |
| siControl 3 nM UL vs. siGJA1 3 nM UL       | 3.650000                                                                                                                                         | 1.676667     | 1.630050 | 4  | 0.178424 | 3   | 3   | 1.879282         | 0.930018         | 4.083205          | 0.393453    |
| siControl 3 nM UR vs. siGJA1 3 nM UR       | 17.36667                                                                                                                                         | 12.17667     | 1.051679 | 4  | 0.352283 | 3   | 3   | 7.975715         | 3.074026         | 6.731693          | 0.258676    |
| siControl 3 nM LL vs. siGJA1 3 nM LL       | 71.64000                                                                                                                                         | 80.55000     | -1.01052 | 4  | 0.369409 | 3   | 3   | 13.84192         | 6.452379         | 4.602065          | 0.357011    |
| siControl 3 nM LR vs. siGJA1 3 nM LR       | 7.343333                                                                                                                                         | 5.596667     | 0.622181 | 4  | 0.567532 | 3   | 3   | 4.073577         | 2.655039         | 2.354020          | 0.596299    |
| siControl 10 nM UL vs. siGJA1 10 nM UL     | 4.833333                                                                                                                                         | 3.323333     | 0.877350 | 4  | 0.429832 | 3   | 3   | 2.704891         | 1.253010         | 4.660050          | 0.353354    |
| siControl 10 nM UR vs. siGJA1 10 nM UR     | 20.35667                                                                                                                                         | 11.76667     | 1.515474 | 4  | 0.204232 | 3   | 3   | 8.579571         | 4.772445         | 3.231835          | 0.472608    |
| siControl 10 nM LL vs. siGJA1 10 nM LL     | 66.88667                                                                                                                                         | 77.84000     | -1.00498 | 4  | 0.371768 | 3   | 3   | 16.05146         | 9.935698         | 2.609951          | 0.554024    |
| siControl 10 nM LR vs. siGJA1 10 nM LR     | 7.923333                                                                                                                                         | 7.066667     | 0.233652 | 4  | 0.826726 | 3   | 3   | 4.971683         | 3.951004         | 1.583405          | 0.774172    |

|                                           |          |          |          |   |          |   |   |          |          |          |          |
|-------------------------------------------|----------|----------|----------|---|----------|---|---|----------|----------|----------|----------|
| siControl 33 nM UL vs. siGJA1<br>33 nM UL | 8.270000 | 6.770000 | 0.673919 | 4 | 0.537302 | 3 | 3 | 2.264244 | 3.120192 | 1.898962 | 0.689902 |
| siControl 33 nM UR vs. siGJA1<br>33 nM UR | 33.62000 | 24.59667 | 0.860968 | 4 | 0.437805 | 3 | 3 | 14.90806 | 10.35711 | 2.071885 | 0.651066 |
| siControl 33 nM LL vs. siGJA1<br>33 nM LL | 45.23000 | 55.18333 | 0.604042 | 4 | 0.578401 | 3 | 3 | 22.94295 | 16.97594 | 1.826546 | 0.707577 |
| siControl 33 nM LR vs. siGJA1<br>33 nM LR | 12.87667 | 13.45000 | 0.136468 | 4 | 0.898044 | 3 | 3 | 5.803312 | 4.390068 | 1.747468 | 0.727943 |

**Table S22.** continuation

|                                             |          |          |           |   |          |   |   |          |          |          |          |
|---------------------------------------------|----------|----------|-----------|---|----------|---|---|----------|----------|----------|----------|
| siControl 100 nM UL vs. siGJA1<br>100 nM UL | 8.610000 | 8.013333 | 0.246578  | 4 | 0.817372 | 3 | 3 | 2.180000 | 3.579628 | 2.696266 | 0.541087 |
| siControl 100 nM UR vs. siGJA1<br>100 nM UR | 34.77333 | 27.35667 | 0.609535  | 4 | 0.575095 | 3 | 3 | 16.09174 | 13.60951 | 1.398045 | 0.834013 |
| siControl 100 nM LL vs. siGJA1<br>100 nM LL | 42.59667 | 49.74000 | -0.422721 | 4 | 0.694234 | 3 | 3 | 22.46032 | 18.76726 | 1.432287 | 0.822271 |
| siControl 100 nM LR vs. siGJA1<br>100 nM LR | 14.01667 | 14.89000 | -0.286900 | 4 | 0.788437 | 3 | 3 | 4.524404 | 2.707046 | 2.793389 | 0.527233 |

**Table S23.** Changes in the paclitaxel-induced apoptosis of FaDu after knocking down Cx43. Annexin V-FLUOS/PI (Ann/PI)-stained HNSCC cells were analyzed by FACS after 48 h of treatment with paclitaxel at different concentrations. Live cells are presented by the Ann-/PI- fraction (LL), apoptotic cells by the Ann+/PI- fraction (LR), secondary necrotic cells by the Ann+/PI+ fraction (UR) and primary necrotic cells are detected in the Ann-/PI+ fraction (UL). (Figure S2).

| Concentration<br>(nM) | Paclitaxel-induced apoptosis of non-targeting siRNA treated FaDu cell (%) |          |          |       |      |          |
|-----------------------|---------------------------------------------------------------------------|----------|----------|-------|------|----------|
|                       | Sample 1                                                                  | Sample 2 | Sample 3 | Mean  | SD   |          |
| Control               | UL                                                                        | 0.99     | 0.8      | 0.39  | 0.7  | 0.306649 |
|                       | UR                                                                        | 6.47     | 18.53    | 10.77 | 11.9 | 6.112163 |
|                       | LL                                                                        | 89.52    | 78.09    | 86.38 | 84.7 | 5.905204 |
|                       | LR                                                                        | 3.02     | 2.57     | 2.46  | 2.7  | 0.296704 |
| 1                     | UL                                                                        | 0.76     | 0.89     | 0.57  | 0.7  | 0.160935 |
|                       | UR                                                                        | 4.71     | 19.58    | 8.68  | 11.0 | 7.699435 |
|                       | LL                                                                        | 91.78    | 76.06    | 88.56 | 85.5 | 8.303983 |
|                       | LR                                                                        | 2.76     | 3.47     | 2.19  | 2.8  | 0.641275 |
| 3                     | UL                                                                        | 0.62     | 0.97     | 0.43  | 0.7  | 0.273922 |
|                       | UR                                                                        | 5.45     | 21.33    | 10    | 12.3 | 8.177671 |
|                       | LL                                                                        | 89.96    | 73.72    | 85.64 | 83.1 | 8.411167 |
|                       | LR                                                                        | 3.97     | 3.98     | 3.93  | 4.0  | 0.026458 |
| 10                    | UL                                                                        | 1.37     | 1.57     | 1.02  | 1.3  | 0.278388 |
|                       | UR                                                                        | 6.98     | 26.64    | 11.54 | 15.1 | 10.29012 |
|                       | LL                                                                        | 85.46    | 62.9     | 80.28 | 76.2 | 11.81701 |
|                       | LR                                                                        | 6.19     | 8.89     | 7.16  | 7.4  | 1.367711 |
| 33                    | UL                                                                        | 3.68     | 3.08     | 2.64  | 3.1  | 0.522047 |
|                       | UR                                                                        | 8.42     | 32.7     | 20.46 | 20.5 | 12.14014 |



|                                                                         | LL | 77.2     | 43.78    | 58.06    | 59.7  | 16.76879 |
|-------------------------------------------------------------------------|----|----------|----------|----------|-------|----------|
|                                                                         | LR | 10.71    | 20.45    | 18.84    | 16.7  | 5.221057 |
|                                                                         | UL | 7.78     | 3.66     | 7.86     | 6.4   | 2.40211  |
| 100                                                                     | UR | 11.18    | 45.74    | 25.84    | 27.6  | 17.34608 |
|                                                                         | LL | 59.06    | 28.6     | 47.9     | 45.2  | 15.41021 |
|                                                                         | LR | 21.97    | 21.99    | 18.4     | 20.8  | 2.066938 |
| Paclitaxel-induced apoptosis of <i>GJA1</i> siRNA treated FaDu cell (%) |    |          |          |          |       |          |
| Concentration (nM)                                                      |    | Sample 1 | Sample 2 | Sample 3 | Mean  | SD       |
| Control                                                                 | UL | 0.45     | 0.42     | 0.64     | 0.50  | 0.119304 |
|                                                                         | UR | 3.49     | 12.3     | 13.13    | 9.64  | 5.3422   |
|                                                                         | LL | 93.77    | 84.16    | 84.22    | 87.38 | 5.531097 |
|                                                                         | LR | 2.28     | 3.12     | 2.01     | 2.47  | 0.578878 |
| 1                                                                       | UL | 0.51     | 0.46     | 0.65     | 0.54  | 0.098489 |
|                                                                         | UR | 5.56     | 13.97    | 9.16     | 9.56  | 4.219483 |
|                                                                         | LL | 90.43    | 82.8     | 87.44    | 86.89 | 3.84462  |
|                                                                         | LR | 3.49     | 2.77     | 2.75     | 3.00  | 0.421584 |
| 3                                                                       | UL | 0.76     | 0.71     | 0.61     | 0.69  | 0.076376 |
|                                                                         | UR | 4.75     | 14.05    | 9.59     | 9.46  | 4.651294 |
|                                                                         | LL | 91.6     | 81.22    | 86.28    | 86.37 | 5.190543 |
|                                                                         | LR | 2.89     | 4.02     | 3.52     | 3.48  | 0.566245 |
| Table S23. continuation                                                 |    |          |          |          |       |          |
| 10                                                                      | UL | 0.6      | 0.99     | 0.75     | 0.78  | 0.196723 |
|                                                                         | UR | 3.74     | 19.1     | 8.73     | 10.52 | 7.83546  |
|                                                                         | LL | 92.1     | 73.4     | 83.63    | 83.04 | 9.363794 |
|                                                                         | LR | 3.56     | 6.51     | 6.89     | 5.65  | 1.822809 |
| 33                                                                      | UL | 1.11     | 0.88     | 0.88     | 0.96  | 0.132791 |
|                                                                         | UR | 6.05     | 14.76    | 11.43    | 10.75 | 4.395024 |
|                                                                         | LL | 87.21    | 73.93    | 79.88    | 80.34 | 6.65194  |
|                                                                         | LR | 5.63     | 10.43    | 7.81     | 7.96  | 2.403359 |
| 100                                                                     | UL | 1.58     | 0.98     | 0.77     | 1.11  | 0.420357 |
|                                                                         | UR | 5.98     | 17.16    | 13.67    | 12.27 | 5.719974 |
|                                                                         | LL | 82.66    | 67.51    | 75.07    | 75.08 | 7.575005 |
|                                                                         | LR | 9.78     | 14.35    | 10.49    | 11.54 | 2.459289 |

**Table S24.** Changes in the paclitaxel-induced apoptosis of FaDu after knocking down Cx43. Annexin V-FLUOS/PI (Ann/PI)-stained HNSCC cells were analyzed by FACS after 48 h of treatment with paclitaxel at different concentrations. Live cells are presented by the Ann-/PI- fraction (LL), apoptotic cells by the Ann+/PI- fraction (LR), secondary necrotic cells by the Ann+/PI+ fraction (UR) and primary necrotic cells are detected in the Ann-/PI+ fraction (UL). Statistical analysis was performed by Student’s t-test, the cell fractions in all concentration were compared to negative control fractions in non-targeting siRNA or *GJA1* siRNA treated samples. The cell fractions in *GJA1* siRNA treated samples were also compared to cell fractions in non-targeting siRNA treated samples. Red color indicate if  $p < 0.05$ . (Figure S2).

| Group 1 vs. Group 2      | T-test for Independent Samples (Paclitaxel_FACS_FaDu_non-targeting siRNA) Note: Variables were treated as independent samples |              |          |    |          |                 |                 |                  |                  |                   |             |
|--------------------------|-------------------------------------------------------------------------------------------------------------------------------|--------------|----------|----|----------|-----------------|-----------------|------------------|------------------|-------------------|-------------|
|                          | Mean Group 1                                                                                                                  | Mean Group 2 | t-value  | df | p        | Valid N Group 1 | Valid N Group 2 | Std.Dev. Group 1 | Std.Dev. Group 2 | F-ratio Variances | p Variances |
| Control UL vs. 1 nM UL   | 0.726667                                                                                                                      | 0.740000     | -0.06669 | 4  | 0.950032 | 3               | 3               | 0.306649         | 0.160935         | 3.6306            | 0.431907    |
| Control UL vs. 3 nM UL   | 0.726667                                                                                                                      | 0.673333     | 0.22466  | 4  | 0.833252 | 3               | 3               | 0.306649         | 0.273922         | 1.2532            | 0.887618    |
| Control UL vs. 10 nM UL  | 0.726667                                                                                                                      | 1.320000     | -2.48133 | 4  | 0.068114 | 3               | 3               | 0.306649         | 0.278388         | 1.2133            | 0.903614    |
| Control UL vs. 33 nM UL  | 0.726667                                                                                                                      | 3.133333     | -6.88494 | 4  | 0.002332 | 3               | 3               | 0.306649         | 0.522047         | 2.8983            | 0.513049    |
| Control UL vs. 100 nM UL | 0.726667                                                                                                                      | 6.433333     | -4.08169 | 4  | 0.015078 | 3               | 3               | 0.306649         | 2.402110         | 61.3626           | 0.032070    |
| 1 nM UL vs. 3 nM UL      | 0.740000                                                                                                                      | 0.673333     | 0.36346  | 4  | 0.734659 | 3               | 3               | 0.160935         | 0.273922         | 2.8970            | 0.513210    |
| 1 nM UL vs. 10 nM UL     | 0.740000                                                                                                                      | 1.320000     | -3.12412 | 4  | 0.035385 | 3               | 3               | 0.160935         | 0.278388         | 2.9923            | 0.500967    |
| 1 nM UL vs. 33 nM UL     | 0.740000                                                                                                                      | 3.133333     | -7.58822 | 4  | 0.001618 | 3               | 3               | 0.160935         | 0.522047         | 10.5225           | 0.173573    |
| 1 nM UL vs. 100 nM UL    | 0.740000                                                                                                                      | 6.433333     | -4.09602 | 4  | 0.014902 | 3               | 3               | 0.160935         | 2.402110         | 222.7851          | 0.008937    |
| 3 nM UL vs. 10 nM UL     | 0.673333                                                                                                                      | 1.320000     | -2.86787 | 4  | 0.045567 | 3               | 3               | 0.273922         | 0.278388         | 1.0329            | 0.983829    |
| 3 nM UL vs. 33 nM UL     | 0.673333                                                                                                                      | 3.133333     | -7.22731 | 4  | 0.001944 | 3               | 3               | 0.273922         | 0.522047         | 3.6322            | 0.431764    |
| 3 nM UL vs. 100 nM UL    | 0.673333                                                                                                                      | 6.433333     | -4.12653 | 4  | 0.014535 | 3               | 3               | 0.273922         | 2.402110         | 76.9009           | 0.025674    |
| 10 nM UL vs. 33 nM UL    | 1.320000                                                                                                                      | 3.133333     | -5.30864 | 4  | 0.006052 | 3               | 3               | 0.278388         | 0.522047         | 3.5166            | 0.442815    |
| 10 nM UL vs. 100 nM UL   | 1.320000                                                                                                                      | 6.433333     | -3.66247 | 4  | 0.021533 | 3               | 3               | 0.278388         | 2.402110         | 74.4533           | 0.026506    |
| 33 nM UL vs. 100 nM UL   | 3.133333                                                                                                                      | 6.433333     | -2.32520 | 4  | 0.080675 | 3               | 3               | 0.522047         | 2.402110         | 21.1722           | 0.090203    |

**Table S24.** continuation

| Group 1 vs. Group 2    | T-test for Independent Samples (Paclitaxel_FACS_FaDu_non-targeting siRNA) Note: Variables were treated as independent samples |              |          |    |          |                 |                 |                  |                  |                   |             |
|------------------------|-------------------------------------------------------------------------------------------------------------------------------|--------------|----------|----|----------|-----------------|-----------------|------------------|------------------|-------------------|-------------|
|                        | Mean Group 1                                                                                                                  | Mean Group 2 | t-value  | df | p        | Valid N Group 1 | Valid N Group 2 | Std.Dev. Group 1 | Std.Dev. Group 2 | F-ratio Variances | p Variances |
| Control UR vs. 1 nM UR | 11.92333                                                                                                                      | 10.99000     | 0.16444  | 4  | 0.877357 | 3               | 3               | 6.11216          | 7.69944          | 1.586821          | 0.773150    |
| Control UR vs. 3 nM UR | 11.92333                                                                                                                      | 12.26000     | -0.05712 | 4  | 0.957192 | 3               | 3               | 6.11216          | 8.17767          | 1.790068          | 0.716829    |

|                          |          |          |          |   |          |   |   |          |          |          |          |
|--------------------------|----------|----------|----------|---|----------|---|---|----------|----------|----------|----------|
| Control UR vs. 10 nM UR  | 11.92333 | 15.05333 | -0.45297 | 4 | 0.674056 | 3 | 3 | 6.11216  | 10.29012 | 2.834333 | 0.521603 |
| Control UR vs. 33 nM UR  | 11.92333 | 20.52667 | -1.09634 | 4 | 0.334504 | 3 | 3 | 6.11216  | 12.14014 | 3.945094 | 0.404441 |
| Control UR vs. 100 nM UR | 11.92333 | 27.58667 | -1.47513 | 4 | 0.214205 | 3 | 3 | 6.11216  | 17.34608 | 8.054024 | 0.220896 |
| 1 nM UR vs. 3 nM UR      | 10.99000 | 12.26000 | -0.19584 | 4 | 0.854279 | 3 | 3 | 7.69944  | 8.17767  | 1.128084 | 0.939812 |
| 1 nM UR vs. 10 nM UR     | 10.99000 | 15.05333 | -0.54762 | 4 | 0.613074 | 3 | 3 | 7.69944  | 10.29012 | 1.786171 | 0.717831 |
| 1 nM UR vs. 33 nM UR     | 10.99000 | 20.52667 | -1.14901 | 4 | 0.314585 | 3 | 3 | 7.69944  | 12.14014 | 2.486162 | 0.573697 |
| 1 nM UR vs. 100 nM UR    | 10.99000 | 27.58667 | -1.51471 | 4 | 0.204417 | 3 | 3 | 7.69944  | 17.34608 | 5.075572 | 0.329187 |
| 3 nM UR vs. 10 nM UR     | 12.26000 | 15.05333 | -0.36810 | 4 | 0.731454 | 3 | 3 | 8.17767  | 10.29012 | 1.583367 | 0.774184 |
| 3 nM UR vs. 33 nM UR     | 12.26000 | 20.52667 | -0.97819 | 4 | 0.383367 | 3 | 3 | 8.17767  | 12.14014 | 2.203880 | 0.624243 |
| 3 nM UR vs. 100 nM UR    | 12.26000 | 27.58667 | -1.38429 | 4 | 0.238490 | 3 | 3 | 8.17767  | 17.34608 | 4.499285 | 0.363684 |
| 10 nM UR vs. 33 nM UR    | 15.05333 | 20.52667 | -0.59569 | 4 | 0.583450 | 3 | 3 | 10.29012 | 12.14014 | 1.391895 | 0.836157 |
| 10 nM UR vs. 100 nM UR   | 15.05333 | 27.58667 | -1.07634 | 4 | 0.342362 | 3 | 3 | 10.29012 | 17.34608 | 2.841594 | 0.520617 |
| 33 nM UR vs. 100 nM UR   | 20.52667 | 27.58667 | -0.57756 | 4 | 0.594515 | 3 | 3 | 12.14014 | 17.34608 | 2.041529 | 0.657564 |

**Table S24.** continuation

| Group 1 vs. Group 2      | T-test for Independent Samples (Paclitaxel_FACS_FaDu_non-targeting siRNA) Note: Variables were treated as independent samples |              |          |    |          |                 |                 |                  |                  |                   |             |
|--------------------------|-------------------------------------------------------------------------------------------------------------------------------|--------------|----------|----|----------|-----------------|-----------------|------------------|------------------|-------------------|-------------|
|                          | Mean Group 1                                                                                                                  | Mean Group 2 | t-value  | df | p        | Valid N Group 1 | Valid N Group 2 | Std.Dev. Group 1 | Std.Dev. Group 2 | F-ratio Variances | p Variances |
| Control LL vs. 1 nM LL   | 84.66333                                                                                                                      | 85.46667     | -0.13655 | 4  | 0.897981 | 3               | 3               | 5.90520          | 8.30398          | 1.977439          | 0.671718    |
| Control LL vs. 3 nM LL   | 84.66333                                                                                                                      | 83.10667     | 0.26235  | 4  | 0.806007 | 3               | 3               | 5.90520          | 8.41117          | 2.028816          | 0.660324    |
| Control LL vs. 10 nM LL  | 84.66333                                                                                                                      | 76.21333     | 1.10791  | 4  | 0.330034 | 3               | 3               | 5.90520          | 11.81701         | 4.004474          | 0.399642    |
| Control LL vs. 33 nM LL  | 84.66333                                                                                                                      | 59.68000     | 2.43402  | 4  | 0.071669 | 3               | 3               | 5.90520          | 16.76879         | 8.063689          | 0.220661    |
| Control LL vs. 100 nM LL | 84.66333                                                                                                                      | 45.18667     | 4.14325  | 4  | 0.014339 | 3               | 3               | 5.90520          | 15.41021         | 6.810002          | 0.256082    |
| 1 nM LL vs. 3 nM LL      | 85.46667                                                                                                                      | 83.10667     | 0.34583  | 4  | 0.746890 | 3               | 3               | 8.30398          | 8.41117          | 1.025982          | 0.987176    |
| 1 nM LL vs. 10 nM LL     | 85.46667                                                                                                                      | 76.21333     | 1.10970  | 4  | 0.329347 | 3               | 3               | 8.30398          | 11.81701         | 2.025081          | 0.661139    |
| 1 nM LL vs. 33 nM LL     | 85.46667                                                                                                                      | 59.68000     | 2.38688  | 4  | 0.075423 | 3               | 3               | 8.30398          | 16.76879         | 4.077845          | 0.393868    |
| 1 nM LL vs. 100 nM LL    | 85.46667                                                                                                                      | 45.18667     | 3.98551  | 4  | 0.016326 | 3               | 3               | 8.30398          | 15.41021         | 3.443849          | 0.450060    |
| 3 nM LL vs. 10 nM LL     | 83.10667                                                                                                                      | 76.21333     | 0.82315  | 4  | 0.456667 | 3               | 3               | 8.41117          | 11.81701         | 1.973798          | 0.672541    |
| 3 nM LL vs. 33 nM LL     | 83.10667                                                                                                                      | 59.68000     | 2.16290  | 4  | 0.096575 | 3               | 3               | 8.41117          | 16.76879         | 3.974578          | 0.402044    |

|                        |          |          |         |   |          |   |   |          |          |          |          |
|------------------------|----------|----------|---------|---|----------|---|---|----------|----------|----------|----------|
| 3 nM LL vs. 100 nM LL  | 83.10667 | 45.18667 | 3.74108 | 4 | 0.020102 | 3 | 3 | 8.41117  | 15.41021 | 3.356638 | 0.459070 |
| 10 nM LL vs. 33 nM LL  | 76.21333 | 59.68000 | 1.39594 | 4 | 0.235228 | 3 | 3 | 11.81701 | 16.76879 | 2.013670 | 0.663643 |
| 10 nM LL vs. 100 nM LL | 76.21333 | 45.18667 | 2.76731 | 4 | 0.050470 | 3 | 3 | 11.81701 | 15.41021 | 1.700599 | 0.740577 |
| 33 nM LL vs. 100 nM LL | 59.68000 | 45.18667 | 1.10226 | 4 | 0.332209 | 3 | 3 | 16.76879 | 15.41021 | 1.184095 | 0.915711 |

Table S24. continuation

| Group 1 vs. Group 2      | T-test for Independent Samples (Paclitaxel_FACS_FaDu_non-targeting siRNA) Note: Variables were treated as independent samples |              |          |    |          |                 |                 |                  |                  |                   |             |
|--------------------------|-------------------------------------------------------------------------------------------------------------------------------|--------------|----------|----|----------|-----------------|-----------------|------------------|------------------|-------------------|-------------|
|                          | Mean Group 1                                                                                                                  | Mean Group 2 | t-value  | df | p        | Valid N Group 1 | Valid N Group 2 | Std.Dev. Group 1 | Std.Dev. Group 2 | F-ratio Variances | p Variances |
| Control LR vs. 1 nM LR   | 2.68333                                                                                                                       | 2.80667      | -0.3023  | 4  | 0.777472 | 3               | 3               | 0.296704         | 0.641275         | 4.67              | 0.352651    |
| Control LR vs. 3 nM LR   | 2.68333                                                                                                                       | 3.96000      | -7.4233  | 4  | 0.001758 | 3               | 3               | 0.296704         | 0.026458         | 125.76            | 0.015778    |
| Control LR vs. 10 nM LR  | 2.68333                                                                                                                       | 7.41333      | -5.8538  | 4  | 0.004249 | 3               | 3               | 0.296704         | 1.367711         | 21.25             | 0.089891    |
| Control LR vs. 33 nM LR  | 2.68333                                                                                                                       | 16.66667     | -4.6314  | 4  | 0.009797 | 3               | 3               | 0.296704         | 5.221057         | 309.65            | 0.006438    |
| Control LR vs. 100 nM LR | 2.68333                                                                                                                       | 20.78667     | -15.0163 | 4  | 0.000115 | 3               | 3               | 0.296704         | 2.066938         | 48.53             | 0.040380    |
| 1 nM LR vs. 3 nM LR      | 2.80667                                                                                                                       | 3.96000      | -3.1124  | 4  | 0.035787 | 3               | 3               | 0.641275         | 0.026458         | 587.48            | 0.003399    |
| 1 nM LR vs. 10 nM LR     | 2.80667                                                                                                                       | 7.41333      | -5.2820  | 4  | 0.006162 | 3               | 3               | 0.641275         | 1.367711         | 4.55              | 0.360436    |
| 1 nM LR vs. 33 nM LR     | 2.80667                                                                                                                       | 16.66667     | -4.5637  | 4  | 0.010310 | 3               | 3               | 0.641275         | 5.221057         | 66.29             | 0.029723    |
| 1 nM LR vs. 100 nM LR    | 2.80667                                                                                                                       | 20.78667     | -14.3902 | 4  | 0.000136 | 3               | 3               | 0.641275         | 2.066938         | 10.39             | 0.175611    |
| 3 nM LR vs. 10 nM LR     | 3.96000                                                                                                                       | 7.41333      | -4.3724  | 4  | 0.011945 | 3               | 3               | 0.026458         | 1.367711         | 2672.33           | 0.000748    |
| 3 nM LR vs. 33 nM LR     | 3.96000                                                                                                                       | 16.66667     | -4.2153  | 4  | 0.013529 | 3               | 3               | 0.026458         | 5.221057         | 38942.05          | 0.000051    |
| 3 nM LR vs. 100 nM LR    | 3.96000                                                                                                                       | 20.78667     | -14.0992 | 4  | 0.000147 | 3               | 3               | 0.026458         | 2.066938         | 6103.19           | 0.000328    |
| 10 nM LR vs. 33 nM LR    | 7.41333                                                                                                                       | 16.66667     | -2.9695  | 4  | 0.041163 | 3               | 3               | 1.367711         | 5.221057         | 14.57             | 0.128433    |
| 10 nM LR vs. 100 nM LR   | 7.41333                                                                                                                       | 20.78667     | -9.3458  | 4  | 0.000730 | 3               | 3               | 1.367711         | 2.066938         | 2.28              | 0.609042    |
| 33 nM LR vs. 100 nM LR   | 16.66667                                                                                                                      | 20.78667     | -1.2708  | 4  | 0.272672 | 3               | 3               | 5.221057         | 2.066938         | 6.38              | 0.270980    |

Table S24. continuation

| Group 1 vs. Group 2    | T-test for Independent Samples (Paclitaxel_FACS_FaDu_GJA1 siRNA) Note: Variables were treated as independent samples |              |          |    |          |                 |                 |                  |                  |                   |             |
|------------------------|----------------------------------------------------------------------------------------------------------------------|--------------|----------|----|----------|-----------------|-----------------|------------------|------------------|-------------------|-------------|
|                        | Mean Group 1                                                                                                         | Mean Group 2 | t-value  | df | p        | Valid N Group 1 | Valid N Group 2 | Std.Dev. Group 1 | Std.Dev. Group 2 | F-ratio Variances | p Variances |
| Control UL vs. 1 nM UL | 0.503333                                                                                                             | 0.540000     | -0.41052 | 4  | 0.702465 | 3               | 3               | 0.119304         | 0.098489         | 1.46735           | 0.810585    |
| Control UL vs. 3 nM UL | 0.503333                                                                                                             | 0.693333     | -2.32315 | 4  | 0.080857 | 3               | 3               | 0.119304         | 0.076376         | 2.44000           | 0.581395    |

|                          |          |          |          |   |          |   |   |          |          |          |          |
|--------------------------|----------|----------|----------|---|----------|---|---|----------|----------|----------|----------|
| Control UL vs. 10 nM UL  | 0.503333 | 0.780000 | -2.08283 | 4 | 0.105685 | 3 | 3 | 0.119304 | 0.196723 | 2.71897  | 0.537783 |
| Control UL vs. 33 nM UL  | 0.503333 | 0.956667 | -4.39855 | 4 | 0.011704 | 3 | 3 | 0.119304 | 0.132791 | 1.23888  | 0.893305 |
| Control UL vs. 100 nM UL | 0.503333 | 1.110000 | -2.40475 | 4 | 0.073974 | 3 | 3 | 0.119304 | 0.420357 | 12.41452 | 0.149092 |
| 1 nM UL vs. 3 nM UL      | 0.540000 | 0.693333 | -2.13091 | 4 | 0.100106 | 3 | 3 | 0.098489 | 0.076376 | 1.66286  | 0.751073 |
| 1 nM UL vs. 10 nM UL     | 0.540000 | 0.780000 | -1.88951 | 4 | 0.131825 | 3 | 3 | 0.098489 | 0.196723 | 3.98969  | 0.400826 |
| 1 nM UL vs. 33 nM UL     | 0.540000 | 0.956667 | -4.36519 | 4 | 0.012013 | 3 | 3 | 0.098489 | 0.132791 | 1.81787  | 0.709756 |
| 1 nM UL vs. 100 nM UL    | 0.540000 | 1.110000 | -2.28672 | 4 | 0.084161 | 3 | 3 | 0.098489 | 0.420357 | 18.21649 | 0.104077 |
| 3 nM UL vs. 10 nM UL     | 0.693333 | 0.780000 | -0.71133 | 4 | 0.516164 | 3 | 3 | 0.076376 | 0.196723 | 6.63429  | 0.261976 |
| 3 nM UL vs. 33 nM UL     | 0.693333 | 0.956667 | -2.97742 | 4 | 0.040843 | 3 | 3 | 0.076376 | 0.132791 | 3.02286  | 0.497159 |
| 3 nM UL vs. 100 nM UL    | 0.693333 | 1.110000 | -1.68919 | 4 | 0.166451 | 3 | 3 | 0.076376 | 0.420357 | 30.29143 | 0.063915 |
| 10 nM UL vs. 33 nM UL    | 0.780000 | 0.956667 | -1.28924 | 4 | 0.266817 | 3 | 3 | 0.196723 | 0.132791 | 2.19471  | 0.626036 |
| 10 nM UL vs. 100 nM UL   | 0.780000 | 1.110000 | -1.23155 | 4 | 0.285571 | 3 | 3 | 0.196723 | 0.420357 | 4.56589  | 0.359331 |
| 33 nM UL vs. 100 nM UL   | 0.956667 | 1.110000 | -0.60245 | 4 | 0.579359 | 3 | 3 | 0.132791 | 0.420357 | 10.02079 | 0.181475 |

Table S24. continuation

| Group 1 vs. Group 2      | T-test for Independent Samples (Paclitaxel_FACS_FaDu_GJA1 siRNA) Note: Variables were treated as independent samples |              |           |    |          |                 |                 |                  |                  |                   |             |
|--------------------------|----------------------------------------------------------------------------------------------------------------------|--------------|-----------|----|----------|-----------------|-----------------|------------------|------------------|-------------------|-------------|
|                          | Mean Group 1                                                                                                         | Mean Group 2 | t-value   | df | p        | Valid N Group 1 | Valid N Group 2 | Std.Dev. Group 1 | Std.Dev. Group 2 | F-ratio Variances | p Variances |
| Control UR vs. 1 nM UR   | 9.64000                                                                                                              | 9.56333      | 0.019506  | 4  | 0.985371 | 3               | 3               | 5.342200         | 4.219483         | 1.602957          | 0.768357    |
| Control UR vs. 3 nM UR   | 9.64000                                                                                                              | 9.46333      | 0.043199  | 4  | 0.967613 | 3               | 3               | 5.342200         | 4.651294         | 1.319146          | 0.862387    |
| Control UR vs. 10 nM UR  | 9.64000                                                                                                              | 10.52333     | -0.161333 | 4  | 0.879652 | 3               | 3               | 5.342200         | 7.835460         | 2.151239          | 0.634671    |
| Control UR vs. 33 nM UR  | 9.64000                                                                                                              | 10.74667     | -0.277085 | 4  | 0.795445 | 3               | 3               | 5.342200         | 4.395024         | 1.477467          | 0.807276    |
| Control UR vs. 100 nM UR | 9.64000                                                                                                              | 12.27000     | -0.582020 | 4  | 0.591780 | 3               | 3               | 5.342200         | 5.719974         | 1.146431          | 0.931779    |
| 1 nM UR vs. 3 nM UR      | 9.56333                                                                                                              | 9.46333      | 0.027580  | 4  | 0.979318 | 3               | 3               | 4.219483         | 4.651294         | 1.215148          | 0.902874    |
| 1 nM UR vs. 10 nM UR     | 9.56333                                                                                                              | 10.52333     | -0.186842 | 4  | 0.860879 | 3               | 3               | 4.219483         | 7.835460         | 3.448344          | 0.449606    |
| 1 nM UR vs. 33 nM UR     | 9.56333                                                                                                              | 10.74667     | -0.336405 | 4  | 0.753473 | 3               | 3               | 4.219483         | 4.395024         | 1.084936          | 0.959262    |
| 1 nM UR vs. 100 nM UR    | 9.56333                                                                                                              | 12.27000     | -0.659560 | 4  | 0.545576 | 3               | 3               | 4.219483         | 5.719974         | 1.837679          | 0.704801    |
| 3 nM UR vs. 10 nM UR     | 9.46333                                                                                                              | 10.52333     | -0.201489 | 4  | 0.850148 | 3               | 3               | 4.651294         | 7.835460         | 2.837798          | 0.521132    |
| 3 nM UR vs. 33 nM UR     | 9.46333                                                                                                              | 10.74667     | -0.347351 | 4  | 0.745834 | 3               | 3               | 4.651294         | 4.395024         | 1.120018          | 0.943388    |

|                        |          |          |           |   |          |   |   |          |          |          |          |
|------------------------|----------|----------|-----------|---|----------|---|---|----------|----------|----------|----------|
| 3 nM UR vs. 100 nM UR  | 9.46333  | 12.27000 | -0.659388 | 4 | 0.545676 | 3 | 3 | 4.651294 | 5.719974 | 1.512309 | 0.796080 |
| 10 nM UR vs. 33 nM UR  | 10.52333 | 10.74667 | -0.043057 | 4 | 0.967719 | 3 | 3 | 7.835460 | 4.395024 | 3.178385 | 0.478654 |
| 10 nM UR vs. 100 nM UR | 10.52333 | 12.27000 | -0.311851 | 4 | 0.770733 | 3 | 3 | 7.835460 | 5.719974 | 1.876467 | 0.695297 |
| 33 nM UR vs. 100 nM UR | 10.74667 | 12.27000 | -0.365772 | 4 | 0.733058 | 3 | 3 | 4.395024 | 5.719974 | 1.693814 | 0.742442 |

**Table S24.** continuation

| Group 1 vs. Group 2      | T-test for Independent Samples (Paclitaxel_FACS_FaDu_GJA1 siRNA) Note: Variables were treated as independent samples |              |         |    |          |                 |                 |                  |                  |                   |             |
|--------------------------|----------------------------------------------------------------------------------------------------------------------|--------------|---------|----|----------|-----------------|-----------------|------------------|------------------|-------------------|-------------|
|                          | Mean Group 1                                                                                                         | Mean Group 2 | t-value | df | p        | Valid N Group 1 | Valid N Group 2 | Std.Dev. Group 1 | Std.Dev. Group 2 | F-ratio Variances | p Variances |
| Control LL vs. 1 nM LL   | 87.38333                                                                                                             | 86.89000     | 0.12685 | 4  | 0.905179 | 3               | 3               | 5.531097         | 3.844620         | 2.069740          | 0.651521    |
| Control LL vs. 3 nM LL   | 87.38333                                                                                                             | 86.36667     | 0.23215 | 4  | 0.827813 | 3               | 3               | 5.531097         | 5.190543         | 1.135526          | 0.936538    |
| Control LL vs. 10 nM LL  | 87.38333                                                                                                             | 83.04333     | 0.69120 | 4  | 0.527459 | 3               | 3               | 5.531097         | 9.363794         | 2.866033          | 0.517326    |
| Control LL vs. 33 nM LL  | 87.38333                                                                                                             | 80.34000     | 1.41016 | 4  | 0.231306 | 3               | 3               | 5.531097         | 6.651940         | 1.446352          | 0.817544    |
| Control LL vs. 100 nM LL | 87.38333                                                                                                             | 75.08000     | 2.27199 | 4  | 0.085539 | 3               | 3               | 5.531097         | 7.575005         | 1.875613          | 0.695504    |
| 1 nM LL vs. 3 nM LL      | 86.89000                                                                                                             | 86.36667     | 0.14033 | 4  | 0.895182 | 3               | 3               | 3.844620         | 5.190543         | 1.822715          | 0.708538    |
| 1 nM LL vs. 10 nM LL     | 86.89000                                                                                                             | 83.04333     | 0.65821 | 4  | 0.546359 | 3               | 3               | 3.844620         | 9.363794         | 5.931942          | 0.288519    |
| 1 nM LL vs. 33 nM LL     | 86.89000                                                                                                             | 80.34000     | 1.47662 | 4  | 0.213828 | 3               | 3               | 3.844620         | 6.651940         | 2.993573          | 0.500805    |
| 1 nM LL vs. 100 nM LL    | 86.89000                                                                                                             | 75.08000     | 2.40800 | 4  | 0.073714 | 3               | 3               | 3.844620         | 7.575005         | 3.882032          | 0.409666    |
| 3 nM LL vs. 10 nM LL     | 86.36667                                                                                                             | 83.04333     | 0.53765 | 4  | 0.619336 | 3               | 3               | 5.190543         | 9.363794         | 3.254454          | 0.470096    |
| 3 nM LL vs. 33 nM LL     | 86.36667                                                                                                             | 80.34000     | 1.23717 | 4  | 0.283691 | 3               | 3               | 5.190543         | 6.651940         | 1.642370          | 0.756896    |
| 3 nM LL vs. 100 nM LL    | 86.36667                                                                                                             | 75.08000     | 2.12890 | 4  | 0.100332 | 3               | 3               | 5.190543         | 7.575005         | 2.129807          | 0.639017    |
| 10 nM LL vs. 33 nM LL    | 83.04333                                                                                                             | 80.34000     | 0.40765 | 4  | 0.704403 | 3               | 3               | 9.363794         | 6.651940         | 1.981559          | 0.670790    |
| 10 nM LL vs. 100 nM LL   | 83.04333                                                                                                             | 75.08000     | 1.14520 | 4  | 0.315991 | 3               | 3               | 9.363794         | 7.575005         | 1.528051          | 0.791123    |
| 33 nM LL vs. 100 nM LL   | 80.34000                                                                                                             | 75.08000     | 0.90373 | 4  | 0.417245 | 3               | 3               | 6.651940         | 7.575005         | 1.296789          | 0.870781    |

**Table S24.** continuation

| Group 1 vs. Group 2    | T-test for Independent Samples (Paclitaxel_FACS_FaDu_GJA1 siRNA) Note: Variables were treated as independent samples |              |          |    |          |                 |                 |                  |                  |                   |             |
|------------------------|----------------------------------------------------------------------------------------------------------------------|--------------|----------|----|----------|-----------------|-----------------|------------------|------------------|-------------------|-------------|
|                        | Mean Group 1                                                                                                         | Mean Group 2 | t-value  | df | p        | Valid N Group 1 | Valid N Group 2 | Std.Dev. Group 1 | Std.Dev. Group 2 | F-ratio Variances | p Variances |
| Control LR vs. 1 nM LR | 2.47000                                                                                                              | 3.00333      | -1.28995 | 4  | 0.266594 | 3               | 3               | 0.578878         | 0.421584         | 1.88541           | 0.693143    |
| Control LR vs. 3 nM LR | 2.47000                                                                                                              | 3.47667      | -2.15319 | 4  | 0.097631 | 3               | 3               | 0.578878         | 0.566245         | 1.04512           | 0.977938    |

|                          |         |          |          |   |          |   |   |          |          |          |          |
|--------------------------|---------|----------|----------|---|----------|---|---|----------|----------|----------|----------|
| Control LR vs. 10 nM LR  | 2.47000 | 5.65333  | -2.88295 | 4 | 0.044880 | 3 | 3 | 0.578878 | 1.822809 | 9.91535  | 0.183228 |
| Control LR vs. 33 nM LR  | 2.47000 | 7.95667  | -3.84419 | 4 | 0.018394 | 3 | 3 | 0.578878 | 2.403359 | 17.23704 | 0.109667 |
| Control LR vs. 100 nM LR | 2.47000 | 11.54000 | -6.21797 | 4 | 0.003405 | 3 | 3 | 0.578878 | 2.459289 | 18.04864 | 0.104994 |
| 1 nM LR vs. 3 nM LR      | 3.00333 | 3.47667  | -1.16132 | 4 | 0.310089 | 3 | 3 | 0.421584 | 0.566245 | 1.80401  | 0.713263 |
| 1 nM LR vs. 10 nM LR     | 3.00333 | 5.65333  | -2.45329 | 4 | 0.070196 | 3 | 3 | 0.421584 | 1.822809 | 18.69449 | 0.101551 |
| 1 nM LR vs. 33 nM LR     | 3.00333 | 7.95667  | -3.51608 | 4 | 0.024537 | 3 | 3 | 0.421584 | 2.403359 | 32.49887 | 0.059703 |
| 1 nM LR vs. 100 nM LR    | 3.00333 | 11.54000 | -5.92584 | 4 | 0.004063 | 3 | 3 | 0.421584 | 2.459289 | 34.02907 | 0.057095 |
| 3 nM LR vs. 10 nM LR     | 3.47667 | 5.65333  | -1.97518 | 4 | 0.119459 | 3 | 3 | 0.566245 | 1.822809 | 10.36272 | 0.176014 |
| 3 nM LR vs. 33 nM LR     | 3.47667 | 7.95667  | -3.14260 | 4 | 0.034761 | 3 | 3 | 0.566245 | 2.403359 | 18.01476 | 0.105181 |
| 3 nM LR vs. 100 nM LR    | 3.47667 | 11.54000 | -5.53412 | 4 | 0.005210 | 3 | 3 | 0.566245 | 2.459289 | 18.86298 | 0.100690 |
| 10 nM LR vs. 33 nM LR    | 5.65333 | 7.95667  | -1.32259 | 4 | 0.256521 | 3 | 3 | 1.822809 | 2.403359 | 1.73842  | 0.730348 |
| 10 nM LR vs. 100 nM LR   | 5.65333 | 11.54000 | -3.33076 | 4 | 0.029085 | 3 | 3 | 1.822809 | 2.459289 | 1.82027  | 0.709151 |
| 33 nM LR vs. 100 nM LR   | 7.95667 | 11.54000 | -1.80493 | 4 | 0.145401 | 3 | 3 | 2.403359 | 2.459289 | 1.04708  | 0.976999 |

Table S24. continuation

| Group 1 vs. Group 2                        | T-test for Independent Samples (Paclitaxel_FACS_FaDu_non-targeting siRNA + GJA1 siRNA) Note: Variables were treated as independent samples |              |           |    |          |     |     |                  |                  |                   |             |
|--------------------------------------------|--------------------------------------------------------------------------------------------------------------------------------------------|--------------|-----------|----|----------|-----|-----|------------------|------------------|-------------------|-------------|
|                                            | Mean Group 1                                                                                                                               | Mean Group 2 | t-value   | df | p        | N 1 | N 2 | Std.Dev. Group 1 | Std.Dev. Group 2 | F-ratio Variances | p Variances |
| siControl Control UL vs. siGJA1 Control UL | 0.726667                                                                                                                                   | 0.503333     | 1.175620  | 4  | 0.304943 | 3   | 3   | 0.306649         | 0.119304         | 6.606557          | 0.262931    |
| siControl Control UR vs. siGJA1 Control UR | 11.92333                                                                                                                                   | 9.640000     | 0.487186  | 4  | 0.651620 | 3   | 3   | 6.112163         | 5.342200         | 1.309030          | 0.866165    |
| siControl Control LL vs. siGJA1 Control LL | 84.66333                                                                                                                                   | 87.38333     | -0.582273 | 4  | 0.591625 | 3   | 3   | 5.905204         | 5.531097         | 1.139849          | 0.934645    |
| siControl Control LR vs. siGJA1 Control LR | 2.683333                                                                                                                                   | 2.470000     | 0.568042  | 4  | 0.600375 | 3   | 3   | 0.296704         | 0.578878         | 3.806513          | 0.416102    |
| siControl 1 nM UL vs. siGJA1 1 nM UL       | 0.740000                                                                                                                                   | 0.540000     | 1.835970  | 4  | 0.140253 | 3   | 3   | 0.160935         | 0.098489         | 2.670103          | 0.544944    |
| siControl 1 nM UR vs. siGJA1 1 nM UR       | 10.99000                                                                                                                                   | 9.563333     | 0.281447  | 4  | 0.792327 | 3   | 3   | 7.699435         | 4.219483         | 3.329656          | 0.461931    |
| siControl 1 nM LL vs. siGJA1 1 nM LL       | 85.46667                                                                                                                                   | 86.89000     | -0.269406 | 4  | 0.800943 | 3   | 3   | 8.303983         | 3.844620         | 4.665156          | 0.353035    |
| siControl 1 nM LR vs. siGJA1 1 nM LR       | 2.806667                                                                                                                                   | 3.003333     | -0.443860 | 4  | 0.680097 | 3   | 3   | 0.641275         | 0.421584         | 2.313766          | 0.603543    |
| siControl 3 nM UL vs. siGJA1 3 nM UL       | 0.673333                                                                                                                                   | 0.693333     | -0.121816 | 4  | 0.908919 | 3   | 3   | 0.273922         | 0.076376         | 12.86286          | 0.144270    |
| siControl 3 nM UR vs. siGJA1 3 nM UR       | 12.26000                                                                                                                                   | 9.463333     | 0.514882  | 4  | 0.633780 | 3   | 3   | 8.177671         | 4.651294         | 3.091090          | 0.488867    |
| siControl 3 nM LL vs. siGJA1 3 nM LL       | 83.10667                                                                                                                                   | 86.36667     | -0.571287 | 4  | 0.598372 | 3   | 3   | 8.411167         | 5.190543         | 2.625953          | 0.551579    |
| siControl 3 nM LR vs. siGJA1 3 nM LR       | 3.960000                                                                                                                                   | 3.476667     | 1.476827  | 4  | 0.213775 | 3   | 3   | 0.026458         | 0.566245         | 458.0476          | 0.004357    |

|                                        |           |           |          |   |          |   |   |          |          |          |          |
|----------------------------------------|-----------|-----------|----------|---|----------|---|---|----------|----------|----------|----------|
| siControl 10 nM UL vs. siGJA1 10 nM UL | 1.320000  | 0.780000  | 2.743793 | 4 | 0.051703 | 3 | 3 | 0.278388 | 0.196723 | 2.002584 | 0.666093 |
| siControl 10 nM UR vs. siGJA1 10 nM UR | 15.053333 | 10.523333 | 0.606646 | 4 | 0.576832 | 3 | 3 | 10.29012 | 7.835460 | 1.724693 | 0.734028 |
| siControl 10 nM LL vs. siGJA1 10 nM LL | 76.213333 | 83.043333 | 0.784622 | 4 | 0.476538 | 3 | 3 | 11.81701 | 9.363794 | 1.592618 | 0.771421 |
| siControl 10 nM LR vs. siGJA1 10 nM LR | 7.413333  | 5.653333  | 1.337682 | 4 | 0.251991 | 3 | 3 | 1.367711 | 1.822809 | 1.776208 | 0.720407 |
| siControl 33 nM UL vs. siGJA1 33 nM UL | 3.133333  | 0.956667  | 6.998884 | 4 | 0.002193 | 3 | 3 | 0.522047 | 0.132791 | 15.45558 | 0.121539 |
| siControl 33 nM UR vs. siGJA1 33 nM UR | 20.52667  | 10.74667  | 1.311997 | 4 | 0.259749 | 3 | 3 | 12.14014 | 4.395024 | 7.630004 | 0.231750 |
| siControl 33 nM LL vs. siGJA1 33 nM LL | 59.68000  | 80.34000  | -1.98360 | 4 | 0.118313 | 3 | 3 | 16.76879 | 6.651940 | 6.354875 | 0.271928 |
| siControl 33 nM LR vs. siGJA1 33 nM LR | 16.66667  | 7.956667  | 2.624750 | 4 | 0.058507 | 3 | 3 | 5.221057 | 2.403359 | 4.719322 | 0.349692 |

Table S24. continuation

|                                          |          |          |          |   |          |   |   |          |          |          |          |
|------------------------------------------|----------|----------|----------|---|----------|---|---|----------|----------|----------|----------|
| siControl 100 nM UL vs. siGJA1 100 nM UL | 6.433333 | 1.110000 | 3.780954 | 4 | 0.019420 | 3 | 3 | 2.402110 | 0.420357 | 32.65497 | 0.059427 |
| siControl 100 nM UR vs. siGJA1 100 nM UR | 27.58667 | 12.27000 | 1.452476 | 4 | 0.220018 | 3 | 3 | 17.34608 | 5.719974 | 9.196333 | 0.196149 |
| siControl 100 nM LL vs. siGJA1 100 nM LL | 45.18667 | 75.08000 | -3.01530 | 4 | 0.039345 | 3 | 3 | 15.41021 | 7.575005 | 4.138579 | 0.389213 |
| siControl 100 nM LR vs. siGJA1 100 nM LR | 20.78667 | 11.54000 | 4.985388 | 4 | 0.007568 | 3 | 3 | 2.066938 | 2.459289 | 1.415676 | 0.827925 |

Table S25. Changes in the effect of paclitaxel on cell viability after transfection Cx43. FaDu was analyzed by trypan blue exclusion test after 48 h of treatment with paclitaxel at different concentrations. Statistical analysis was performed by Student’s t-test, the IC<sub>50</sub> values of the cell lines were compared to each other. Red color indicate if p < 0.05. (Figure 6)

| Group 1 vs. Group 2                     | T-test for Independent Samples (plasmid+paclitaxel)<br>Note: Variables were treated as independent samples |              |         |    |         |     |     |                  |                  |                   |             |
|-----------------------------------------|------------------------------------------------------------------------------------------------------------|--------------|---------|----|---------|-----|-----|------------------|------------------|-------------------|-------------|
|                                         | Mean Group 1                                                                                               | Mean Group 2 | t-value | df | p       | N 1 | N 2 | Std.Dev. Group 1 | Std.Dev. Group 2 | F-ratio Variances | p Variances |
| FaDu ctrl plasmid vs. FaDu Cx43 plasmid | 63.2667                                                                                                    | 6.6186667    | 2.62890 | 4  | 0.05825 | 3   | 3   | 37.1378          | 3.7090195        | 100.256738        | 0.0197518   |

Table S26. Data tables summarizing the results of Cx43 and Bcl-2 immunohistochemical analysis.

| Primary tumor site | Bcl-2 protein expression |    | Total |
|--------------------|--------------------------|----|-------|
|                    | 0                        | 1  |       |
| Oropharynx         | 15                       | 5  | 20    |
| Larynx             | 18                       | 2  | 20    |
| Hypopharynx        | 15                       | 2  | 17    |
| Oral cavity        | 1                        | 0  | 1     |
| <b>Total</b>       | 49                       | 9  | 58    |
| Primary tumor site | Cx43 protein expression  |    | Total |
|                    | 0                        | 1  |       |
| Oropharynx         | 5                        | 15 | 20    |



|              |                                 |          |              |
|--------------|---------------------------------|----------|--------------|
| Larynx       | 6                               | 14       | 20           |
| Hypopharynx  | 3                               | 14       | 17           |
| Oral cavity  | 0                               | 1        | 1            |
| <b>Total</b> | 14                              | 44       | 58           |
| <b>Grade</b> | <b>Cx43 protein expression</b>  |          | <b>Total</b> |
|              | <b>0</b>                        | <b>1</b> |              |
| 1            | 2                               | 3        | 5            |
| 2            | 5                               | 20       | 25           |
| 3            | 6                               | 17       | 23           |
| <b>Total</b> | 13                              | 40       | 53           |
| <b>Grade</b> | <b>Bcl-2 protein expression</b> |          | <b>Total</b> |
|              | <b>0</b>                        | <b>1</b> |              |
| 1            | 4                               | 1        | 5            |
| 2            | 25                              | 0        | 25           |
| 3            | 16                              | 7        | 23           |
| <b>Total</b> | 45                              | 8        | 53           |
| <b>Stage</b> | <b>Bcl-2 protein expression</b> |          | <b>Total</b> |
|              | <b>0</b>                        | <b>1</b> |              |
| 1            | 6                               | 0        | 6            |
| 2            | 8                               | 1        | 9            |
| 3            | 10                              | 3        | 13           |
| 4a           | 19                              | 4        | 23           |
| 4b           | 3                               | 1        | 4            |
| 4c           | 3                               | 0        | 3            |
| <b>Total</b> | 49                              | 9        | 58           |
| <b>Stage</b> | <b>Cx43 protein expression</b>  |          | <b>Total</b> |
|              | <b>0</b>                        | <b>1</b> |              |
| 1            | 1                               | 5        | 6            |
| 2            | 1                               | 8        | 9            |
| 3            | 3                               | 10       | 13           |
| 4a           | 8                               | 15       | 23           |
| 4b           | 1                               | 3        | 4            |

|              |    |    |    |
|--------------|----|----|----|
| 4c           | 0  | 3  | 3  |
| <b>Total</b> | 14 | 44 | 58 |

Table S26. continuation

| TNM <sup>1</sup> T parameter      | Cx43 protein expression           |                   | Total             |                   |       |
|-----------------------------------|-----------------------------------|-------------------|-------------------|-------------------|-------|
|                                   | 0                                 | 1                 |                   |                   |       |
| 1                                 | 2                                 | 8                 | 10                |                   |       |
| 2                                 | 5                                 | 10                | 15                |                   |       |
| 3                                 | 5                                 | 16                | 21                |                   |       |
| 4a                                | 2                                 | 8                 | 10                |                   |       |
| 4b                                | 0                                 | 2                 | 2                 |                   |       |
| <b>Total</b>                      | 14                                | 44                | 58                |                   |       |
| TNM <sup>1</sup> T parameter      | Bcl-2 protein expression          |                   | Total             |                   |       |
|                                   | 0                                 | 1                 |                   |                   |       |
| 1                                 | 10                                | 0                 | 10                |                   |       |
| 2                                 | 12                                | 3                 | 15                |                   |       |
| 3                                 | 15                                | 6                 | 21                |                   |       |
| 4a                                | 10                                | 0                 | 10                |                   |       |
| 4b                                | 2                                 | 0                 | 2                 |                   |       |
| <b>Total</b>                      | 49                                | 9                 | 58                |                   |       |
| Presence of lymph node metastasis | Bcl2 protein expression           |                   | Total             |                   |       |
|                                   | 0                                 | 1                 |                   |                   |       |
| yes                               | 25                                | 2                 | 27                |                   |       |
| no                                | 24                                | 7                 | 31                |                   |       |
| <b>Total</b>                      | 49                                | 9                 | 58                |                   |       |
| Presence of lymph node metastasis | Cx43 protein expression           |                   | Total             |                   |       |
|                                   | 0                                 | 1                 |                   |                   |       |
| yes                               | 5                                 | 22                | 27                |                   |       |
| no                                | 9                                 | 22                | 31                |                   |       |
| <b>Total</b>                      | 14                                | 44                | 58                |                   |       |
| Presence of lymph node metastasis | Cx43 and Bcl-2 protein expression |                   |                   |                   | Total |
|                                   | Bcl-2 0<br>Cx43 0                 | Bcl-2 0<br>Cx43 1 | Bcl-2 1<br>Cx43 0 | Bcl-2 1<br>Cx43 1 |       |

| yes                | 4                                 | 21      | 1       | 1       | 27    |
|--------------------|-----------------------------------|---------|---------|---------|-------|
| no                 | 4                                 | 20      | 5       | 2       | 31    |
| <b>Total</b>       | 8                                 | 41      | 6       | 3       | 58    |
| Primary tumor site | Cx43 and Bcl-2 protein expression |         |         |         | Total |
|                    | Bcl-2 0                           | Bcl-2 0 | Bcl-2 1 | Bcl-2 1 |       |
|                    | Cx43 0                            | Cx43 1  | Cx43 0  | Cx43 1  |       |
| Oropharynx         | 2                                 | 13      | 3       | 2       | 20    |
| Larynx             | 4                                 | 14      | 2       | 0       | 20    |
| Hypopharynx        | 2                                 | 13      | 1       | 1       | 17    |
| Oral cavity        | 0                                 | 1       | 0       | 0       | 1     |
| <b>Total</b>       | 8                                 | 41      | 6       | 3       | 58    |

<sup>1</sup> TNM: tumor, node and metastasis, UICC TNM 7th edition

Table S26. continuation

| Stage        | Cx43 and Bcl-2 protein expression |         |         |         | Total |
|--------------|-----------------------------------|---------|---------|---------|-------|
|              | Bcl-2 0                           | Bcl-2 0 | Bcl-2 1 | Bcl-2 1 |       |
|              | Cx43 0                            | Cx43 1  | Cx43 0  | Cx43 1  |       |
| 1            | 1                                 | 5       | 0       | 0       | 6     |
| 2            | 1                                 | 7       | 0       | 1       | 9     |
| 3            | 1                                 | 9       | 2       | 1       | 13    |
| 4a           | 5                                 | 14      | 3       | 1       | 23    |
| 4b           | 0                                 | 3       | 1       | 0       | 4     |
| 4c           | 0                                 | 3       | 0       | 0       | 3     |
| <b>Total</b> | 8                                 | 41      | 6       | 3       | 58    |
| Grade        | Cx43 and Bcl-2 protein expression |         |         |         | Total |
|              | Bcl-2 0                           | Bcl-2 0 | Bcl-2 1 | Bcl-2 1 |       |
|              | Cx43 0                            | Cx43 1  | Cx43 0  | Cx43 1  |       |
| 1            | 1                                 | 3       | 1       | 0       | 5     |
| 2            | 5                                 | 20      | 0       | 0       | 25    |
| 3            | 2                                 | 14      | 4       | 3       | 23    |
| <b>Total</b> | 8                                 | 37      | 5       | 3       | 53    |

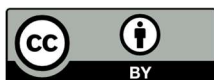

© 2019 by the authors. Submitted for possible open access publication under the terms and conditions of the Creative Commons Attribution (CC BY) license (<http://creativecommons.org/licenses/by/4.0/>).
